# Supplementary material for: Loss of Nup210 results in muscle repair delays and age-associated alterations in muscle integrity
Source: Life Sci Alliance. 2021 Dec 15;5(3):e202101216. doi: 10.26508/lsa.202101216 (PMC8711851; doi:10.26508/lsa.202101216)
Supplement: Supplementary file 1 [file LSA-2021-01216_TableS1.xlsx]

## Sheet: GeneDE
Gene	log2 fold change (MLE): Group NUP210 vs Control	DESeq2 Stat:Mean,SE,Wald stat	Wald test p-value: Group NUP210 vs Control	BH adjusted p-values	Significance: Log2FC 0.585 BHP 0.05	gene_name	Description	gene_biotype	transcript_id	strand	chromosome	start	end	% GC content
ENSMUSG00000022951	-1.45047	1856.92274341213,0.14160000951666,-10.2434322369745	1.26662e-24	1.78606e-20	-1	Rcan1	regulator of calcineurin 1 [Source:MGI Symbol;Acc:MGI:1890564]	protein_coding	ENSMUST00000023672,ENSMUST00000060005	-	chr16	92391953	92466146	49.85
ENSMUSG00000020919	0.505671	3227.40354716581,0.0588193862048045,8.59701337495554	8.18175e-18	5.76854e-14	0	Stat5b	signal transducer and activator of transcription 5B [Source:MGI Symbol;Acc:MGI:103035]	protein_coding	ENSMUST00000004143,ENSMUST00000107358,ENSMUST00000126266	-	chr11	100780731	100850724	46.09
ENSMUSG00000079243	-0.861563	5498.71273503381,0.105385806612016,-8.17532657516286	2.95066e-16	1.38691e-12	-1	Xirp1	xin actin-binding repeat containing 1 [Source:MGI Symbol;Acc:MGI:1333878]	protein_coding	ENSMUST00000111635	-	chr9	120013755	120023598	55.11
ENSMUSG00000042895	-0.611963	4123.3505190973,0.0846900347942952,-7.22591405956586	4.97742e-13	1.64405e-09	-1	Abra	actin-binding Rho activating protein [Source:MGI Symbol;Acc:MGI:2444891]	protein_coding	ENSMUST00000054742	-	chr15	41865293	41869720	44.4
ENSMUSG00000026100	0.568153	1658.42899096015,0.0788618785681303,7.20441049034412	5.82955e-13	1.64405e-09	0	Mstn	myostatin [Source:MGI Symbol;Acc:MGI:95691]	protein_coding	ENSMUST00000027269,ENSMUST00000191197	+	chr1	53061640	53068079	37.5
ENSMUSG00000055053	0.348966	4176.62851513579,0.04867256842728,7.16966679656047	7.51805e-13	1.76687e-09	0	Nfic	nuclear factor I/C [Source:MGI Symbol;Acc:MGI:109591]	protein_coding	ENSMUST00000020461,ENSMUST00000078185,ENSMUST00000105321,ENSMUST00000117966,ENSMUST00000140916,ENSMUST00000152670	-	chr10	81396186	81431005	57.74
ENSMUSG00000023905	-0.757587	474.558113955861,0.106414028846933,-7.11924123740443	1.08523e-12	2.18611e-09	-1	Tnfrsf12a	tumor necrosis factor receptor superfamily, member 12a [Source:MGI Symbol;Acc:MGI:1351484]	protein_coding	ENSMUST00000024698,ENSMUST00000167059	-	chr17	23675447	23677449	57.46
ENSMUSG00000031636	0.498245	5235.03825811766,0.0707208314259513,7.04524351223583	1.85137e-12	3.26328e-09	0	Pdlim3	PDZ and LIM domain 3 [Source:MGI Symbol;Acc:MGI:1859274]	protein_coding	ENSMUST00000034053	+	chr8	45885485	45919546	42.12
ENSMUSG00000052934	0.330763	1981.42196581293,0.0493258443168511,6.70567781175398	2.00474e-11	3.14098e-08	0	Fbxo31	F-box protein 31 [Source:MGI Symbol;Acc:MGI:1354708]	protein_coding	ENSMUST00000059018,ENSMUST00000180539,ENSMUST00000180979,ENSMUST00000181663	-	chr8	121549440	121578806	54.29
ENSMUSG00000026864	-0.340678	3716.64155722744,0.0514355340085459,-6.62339484479378	3.51042e-11	4.95004e-08	0	Hspa5	heat shock protein 5 [Source:MGI Symbol;Acc:MGI:95835]	protein_coding	ENSMUST00000028222,ENSMUST00000100171,ENSMUST00000129333,ENSMUST00000137145,ENSMUST00000145466,ENSMUST00000155595	+	chr2	34771970	34777547	44.42
ENSMUSG00000030996	0.425959	3189.31462571002,0.0652901353978316,6.52409250913612	6.84145e-11	8.77011e-08	0	Art1	ADP-ribosyltransferase 1 [Source:MGI Symbol;Acc:MGI:107511]	protein_coding	ENSMUST00000033300	+	chr7	102101743	102111148	50.7
ENSMUSG00000020053	-0.714065	669.35687589075,0.111097316652553,-6.42738523337032	1.29818e-10	1.52546e-07	-1	Igf1	insulin-like growth factor 1 [Source:MGI Symbol;Acc:MGI:96432]	protein_coding	ENSMUST00000062862,ENSMUST00000095360,ENSMUST00000105300,ENSMUST00000121161,ENSMUST00000121952,ENSMUST00000122100,ENSMUST00000122386,ENSMUST00000126490	+	chr10	87858265	87937042	41.03
ENSMUSG00000045103	0.325968	2506.75134546433,0.0508639390132932,6.40862991071917	1.46833e-10	1.59269e-07	0	Dmd	dystrophin, muscular dystrophy [Source:MGI Symbol;Acc:MGI:94909]	protein_coding	ENSMUST00000113991,ENSMUST00000113992,ENSMUST00000114000,ENSMUST00000123308,ENSMUST00000127295,ENSMUST00000128983,ENSMUST00000132333,ENSMUST00000139998,ENSMUST00000141261,ENSMUST00000141778,ENSMUST00000146331,ENSMUST00000147740,ENSMUST00000149433,ENSMUST00000156107	+	chrX	82948870	85206141	36.15
ENSMUSG00000072235	-0.682374	859.755510393785,0.107217593703804,-6.36438204591385	1.96078e-10	1.88144e-07	-1	Tuba1a	tubulin, alpha 1A [Source:MGI Symbol;Acc:MGI:98869]	protein_coding	ENSMUST00000097014,ENSMUST00000134214,ENSMUST00000136329	-	chr15	98949841	98953551	48.83
ENSMUSG00000032231	-0.644181	804.456885430692,0.101266620722724,-6.36123415271399	2.00139e-10	1.88144e-07	-1	Anxa2	annexin A2 [Source:MGI Symbol;Acc:MGI:88246]	protein_coding	ENSMUST00000034756,ENSMUST00000123470,ENSMUST00000134907,ENSMUST00000136282,ENSMUST00000143878,ENSMUST00000154591	+	chr9	69453620	69491795	47.34
ENSMUSG00000027470	0.371687	15648.6071120176,0.0589133222092308,6.30905164022936	2.8075e-10	2.47429e-07	0	Mylk2	myosin, light polypeptide kinase 2, skeletal muscle [Source:MGI Symbol;Acc:MGI:2139434]	protein_coding	ENSMUST00000028970	+	chr2	152911352	152923068	53.74
ENSMUSG00000028760	0.344742	2618.11277801025,0.0551897135043253,6.24648131563854	4.19802e-10	3.48214e-07	0	Eif4g3	eukaryotic translation initiation factor 4 gamma, 3 [Source:MGI Symbol;Acc:MGI:1923935]	protein_coding	ENSMUST00000058133,ENSMUST00000084214,ENSMUST00000084215,ENSMUST00000105830,ENSMUST00000105831,ENSMUST00000127707,ENSMUST00000132194,ENSMUST00000133902,ENSMUST00000135745,ENSMUST00000139759,ENSMUST00000140317,ENSMUST00000140796,ENSMUST00000148074,ENSMUST00000155142,ENSMUST00000203828	+	chr4	137993022	138208508	45.98
ENSMUSG00000025316	-1.51729	118.705688640216,0.245073514404521,-6.19117734143939	5.97165e-10	4.67812e-07	-1	Banp	BTG3 associated nuclear protein [Source:MGI Symbol;Acc:MGI:1889023]	protein_coding	ENSMUST00000026354,ENSMUST00000093078,ENSMUST00000167711,ENSMUST00000170857,ENSMUST00000172511,ENSMUST00000172513,ENSMUST00000172628,ENSMUST00000172681,ENSMUST00000173201,ENSMUST00000173254,ENSMUST00000173396,ENSMUST00000173753,ENSMUST00000173925,ENSMUST00000174327,ENSMUST00000174445,ENSMUST00000174753	+	chr8	121949750	122029258	50.13
ENSMUSG00000070436	-0.670645	1342.19203636507,0.108881996267826,-6.15937843772966	7.3031e-10	5.42005e-07	-1	Serpinh1	serine (or cysteine) peptidase inhibitor, clade H, member 1 [Source:MGI Symbol;Acc:MGI:88283]	protein_coding	ENSMUST00000094154,ENSMUST00000169437,ENSMUST00000207849,ENSMUST00000207989,ENSMUST00000208119,ENSMUST00000208292,ENSMUST00000208749	-	chr7	99345376	99353239	53.74
ENSMUSG00000021270	-0.900722	1940.36855585616,0.147239962149776,-6.11737207087164	9.51311e-10	6.70722e-07	-1	Hsp90aa1	heat shock protein 90, alpha (cytosolic), class A member 1 [Source:MGI Symbol;Acc:MGI:96250]	protein_coding	ENSMUST00000021698,ENSMUST00000094361,ENSMUST00000124156,ENSMUST00000129005,ENSMUST00000134967,ENSMUST00000145255,ENSMUST00000149189,ENSMUST00000155242	-	chr12	110690605	110702728	47.9
ENSMUSG00000022462	-0.516769	2126.05827984383,0.0847818086023509,-6.0952817749594	1.09245e-09	7.33553e-07	0	Slc38a2	solute carrier family 38, member 2 [Source:MGI Symbol;Acc:MGI:1915010]	protein_coding	ENSMUST00000023099	-	chr15	96687394	96699698	45.78
ENSMUSG00000028132	0.336917	1533.35512270099,0.0553497233351887,6.08704946512576	1.1501e-09	7.37165e-07	0	Tmem56	transmembrane protein 56 [Source:MGI Symbol;Acc:MGI:1923195]	protein_coding	ENSMUST00000029777,ENSMUST00000123427,ENSMUST00000128909,ENSMUST00000135818,ENSMUST00000137234,ENSMUST00000151058,ENSMUST00000155309,ENSMUST00000200402	-	chr3	121201761	121283098	43.86
ENSMUSG00000032712	-0.663876	356.177191560243,0.10942297157599,-6.06705896436108	1.30274e-09	7.98691e-07	-1	2810474O19Rik	RIKEN cDNA 2810474O19 gene [Source:MGI Symbol;Acc:MGI:1914496]	protein_coding	ENSMUST00000046689,ENSMUST00000100765,ENSMUST00000127680,ENSMUST00000130664,ENSMUST00000137983,ENSMUST00000185930,ENSMUST00000187881,ENSMUST00000189837,ENSMUST00000189932,ENSMUST00000190785,ENSMUST00000203348	+	chr6	149309414	149335663	39.55
ENSMUSG00000057719	0.624474	524.423747232562,0.103270993241012,6.04694425716112	1.47619e-09	8.67322e-07	1	Sh3rf2	SH3 domain containing ring finger 2 [Source:MGI Symbol;Acc:MGI:2444628]	protein_coding	ENSMUST00000072008,ENSMUST00000074679,ENSMUST00000128066,ENSMUST00000132681	+	chr18	42053667	42158960	43.56
ENSMUSG00000020900	-0.73641	701.485404045658,0.122080698214607,-6.03215600144051	1.61786e-09	9.1254e-07	-1	Myh10	myosin, heavy polypeptide 10, non-muscle [Source:MGI Symbol;Acc:MGI:1930780]	protein_coding	ENSMUST00000018887,ENSMUST00000092984,ENSMUST00000102611,ENSMUST00000108673,ENSMUST00000124006,ENSMUST00000139059,ENSMUST00000141558,ENSMUST00000143032,ENSMUST00000145408,ENSMUST00000155765	+	chr11	68691559	68816632	45.72
ENSMUSG00000026778	0.378377	1320.88710495953,0.0636922928656169,5.94070262075982	2.83803e-09	1.49379e-06	0	Prkcq	protein kinase C, theta [Source:MGI Symbol;Acc:MGI:97601]	protein_coding	ENSMUST00000028118,ENSMUST00000102970,ENSMUST00000114853,ENSMUST00000192461,ENSMUST00000195207,ENSMUST00000195628	+	chr2	11172108	11301222	43.48
ENSMUSG00000033365	0.388819	2960.60655358692,0.0654641210545482,5.9394241161609	2.86025e-09	1.49379e-06	0	Ipo13	importin 13 [Source:MGI Symbol;Acc:MGI:2385205]	protein_coding	ENSMUST00000036156,ENSMUST00000134752,ENSMUST00000136670,ENSMUST00000140661,ENSMUST00000153918,ENSMUST00000155524	-	chr4	117894486	117914999	51.65
ENSMUSG00000001119	-0.459422	1117.96018287915,0.0775026305743129,-5.92782606332975	3.06971e-09	1.54593e-06	0	Col6a1	collagen, type VI, alpha 1 [Source:MGI Symbol;Acc:MGI:88459]	protein_coding	ENSMUST00000001147,ENSMUST00000137599	-	chr10	76708792	76726168	54.16
ENSMUSG00000036181	0.370087	1767.65803070903,0.0629374923175875,5.88023057820665	4.09695e-09	1.99211e-06	0	Hist1h1c	histone cluster 1, H1c [Source:MGI Symbol;Acc:MGI:1931526]	protein_coding	ENSMUST00000040914	+	chr13	23738808	23740367	55.06
ENSMUSG00000031659	-0.946735	153.436119254808,0.162184721002737,-5.83738426233719	5.30267e-09	2.41871e-06	-1	Adcy7	adenylate cyclase 7 [Source:MGI Symbol;Acc:MGI:102891]	protein_coding	ENSMUST00000098521,ENSMUST00000168545,ENSMUST00000169037,ENSMUST00000171456	+	chr8	88272403	88329962	51.93
ENSMUSG00000015944	0.480052	1066.30043675348,0.0822440474624003,5.83692337345454	5.31735e-09	2.41871e-06	0	Gatsl2	GATS protein-like 2 [Source:MGI Symbol;Acc:MGI:1933384]	protein_coding	ENSMUST00000016088,ENSMUST00000140240,ENSMUST00000201013	+	chr5	134099711	134144343	50.35
ENSMUSG00000001627	-0.512331	1173.97641887574,0.0884804822391983,-5.79033318162472	7.02469e-09	3.09548e-06	0	Ifrd1	interferon-related developmental regulator 1 [Source:MGI Symbol;Acc:MGI:1316717]	protein_coding	ENSMUST00000001672,ENSMUST00000164047,ENSMUST00000164354,ENSMUST00000165027,ENSMUST00000169319,ENSMUST00000169926,ENSMUST00000170119,ENSMUST00000170752,ENSMUST00000171530,ENSMUST00000171553	-	chr12	40201567	40248504	41.54
ENSMUSG00000078515	0.502868	1392.86182118243,0.0869495866657801,5.7834416371402	7.31876e-09	3.12733e-06	0	Ddi2	DNA-damage inducible protein 2 [Source:MGI Symbol;Acc:MGI:1917244]	protein_coding	ENSMUST00000102484,ENSMUST00000177592	-	chr4	141677549	141723419	45.74
ENSMUSG00000024978	0.456014	2152.84013964913,0.0795551951523451,5.73204636006501	9.92261e-09	4.02197e-06	0	Gpam	glycerol-3-phosphate acyltransferase, mitochondrial [Source:MGI Symbol;Acc:MGI:109162]	protein_coding	ENSMUST00000061856	-	chr19	55069734	55099451	47.11
ENSMUSG00000020048	-0.461403	2973.66663317209,0.0805096793071614,-5.73101908812386	9.9829e-09	4.02197e-06	0	Hsp90b1	heat shock protein 90, beta (Grp94), member 1 [Source:MGI Symbol;Acc:MGI:98817]	protein_coding	ENSMUST00000020238,ENSMUST00000129178,ENSMUST00000129413,ENSMUST00000134515,ENSMUST00000146897	-	chr10	86690209	86705509	42.75
ENSMUSG00000063558	0.463967	436.94412789787,0.0815244693392596,5.69114124981912	1.26193e-08	4.94291e-06	0	Aox1	aldehyde oxidase 1 [Source:MGI Symbol;Acc:MGI:88035]	protein_coding	ENSMUST00000001027,ENSMUST00000160168	+	chr1	58029931	58106413	44.15
ENSMUSG00000014846	-0.554958	440.369584930379,0.0976867721460817,-5.6809956773241	1.33913e-08	5.10353e-06	0	Tppp3	tubulin polymerization-promoting protein family member 3 [Source:MGI Symbol;Acc:MGI:1915221]	protein_coding	ENSMUST00000014990,ENSMUST00000176419,ENSMUST00000177126	-	chr8	105467493	105471526	56.27
ENSMUSG00000071226	0.757089	233.320025540589,0.134146992171863,5.64372943936359	1.66406e-08	6.17496e-06	1	Cecr2	cat eye syndrome chromosome region, candidate 2 [Source:MGI Symbol;Acc:MGI:1923799]	protein_coding	ENSMUST00000100993,ENSMUST00000112686,ENSMUST00000124634,ENSMUST00000129803,ENSMUST00000135109,ENSMUST00000143563,ENSMUST00000148346,ENSMUST00000204732	+	chr6	120666369	120771190	41.41
ENSMUSG00000020241	-0.438678	1165.00656261245,0.078320392988369,-5.60107386947854	2.13028e-08	7.70233e-06	0	Col6a2	collagen, type VI, alpha 2 [Source:MGI Symbol;Acc:MGI:88460]	protein_coding	ENSMUST00000001181,ENSMUST00000105413,ENSMUST00000137365	-	chr10	76595762	76623630	50.44
ENSMUSG00000035296	0.377968	1756.29484197189,0.0677136243544454,5.5818676567183	2.37949e-08	8.38831e-06	0	Sgcg	sarcoglycan, gamma (dystrophin-associated glycoprotein) [Source:MGI Symbol;Acc:MGI:1346524]	protein_coding	ENSMUST00000077954,ENSMUST00000121148,ENSMUST00000129886	-	chr14	61221059	61258490	44.1
ENSMUSG00000027075	0.656798	258.298973218439,0.118570106944611,5.53932595939148	3.03638e-08	1.04429e-05	1	Slc43a1	solute carrier family 43, member 1 [Source:MGI Symbol;Acc:MGI:1931352]	protein_coding	ENSMUST00000028469,ENSMUST00000111624,ENSMUST00000111625,ENSMUST00000121114,ENSMUST00000145004,ENSMUST00000146816	+	chr2	84838850	84863594	48.64
ENSMUSG00000036745	0.396823	3253.23757424356,0.0724791631030062,5.4749899196539	4.37537e-08	1.46898e-05	0	Ttll7	tubulin tyrosine ligase-like family, member 7 [Source:MGI Symbol;Acc:MGI:1918142]	protein_coding	ENSMUST00000037942,ENSMUST00000038090,ENSMUST00000106134,ENSMUST00000124743,ENSMUST00000170055,ENSMUST00000197547	+	chr3	146852367	146984009	41.82
ENSMUSG00000037111	0.290881	5638.67223530935,0.053237496482402,5.46383770578505	4.6595e-08	1.52799e-05	0	Setd7	SET domain containing (lysine methyltransferase) 7 [Source:MGI Symbol;Acc:MGI:1920501]	protein_coding	ENSMUST00000037141,ENSMUST00000161755,ENSMUST00000194828,ENSMUST00000195080	-	chr3	51515319	51560879	46.85
ENSMUSG00000031626	0.515349	1090.03764470655,0.094733264027358,5.4399979908452	5.32812e-08	1.70754e-05	0	Sorbs2	sorbin and SH3 domain containing 2 [Source:MGI Symbol;Acc:MGI:1924574]	protein_coding	ENSMUST00000067065,ENSMUST00000067107,ENSMUST00000124544,ENSMUST00000125295,ENSMUST00000126067,ENSMUST00000127395,ENSMUST00000130011,ENSMUST00000130850,ENSMUST00000132139,ENSMUST00000132730,ENSMUST00000132767,ENSMUST00000133864,ENSMUST00000134321,ENSMUST00000134675,ENSMUST00000135336,ENSMUST00000136119,ENSMUST00000136344,ENSMUST00000138049,ENSMUST00000139103,ENSMUST00000139869,ENSMUST00000140088,…	+	chr8	45507788	45827906	40.52
ENSMUSG00000038170	0.266781	48130.1701035046,0.0492049816896578,5.42183822254852	5.89893e-08	1.84846e-05	0	Pde4dip	phosphodiesterase 4D interacting protein (myomegalin) [Source:MGI Symbol;Acc:MGI:1891434]	protein_coding	ENSMUST00000045243,ENSMUST00000090750,ENSMUST00000107038,ENSMUST00000163531,ENSMUST00000168438,ENSMUST00000175751,ENSMUST00000197791,ENSMUST00000200063,ENSMUST00000200232	-	chr3	97689824	97888707	44.36
ENSMUSG00000047747	0.38717	1257.07881401195,0.0716671954368718,5.40232975402501	6.57809e-08	1.9963e-05	0	Rnf150	ring finger protein 150 [Source:MGI Symbol;Acc:MGI:2443860]	protein_coding	ENSMUST00000078525	+	chr8	82863356	83091271	42.33
ENSMUSG00000001552	0.353245	972.128707767743,0.0654124164928749,5.40027582884225	6.65385e-08	1.9963e-05	0	Jup	junction plakoglobin [Source:MGI Symbol;Acc:MGI:96650]	protein_coding	ENSMUST00000001592,ENSMUST00000107403,ENSMUST00000123903,ENSMUST00000124659,ENSMUST00000128268,ENSMUST00000149798,ENSMUST00000151476,ENSMUST00000152774,ENSMUST00000155746	-	chr11	100368958	100397763	52.25
ENSMUSG00000030852	0.605163	5783.35134840692,0.112305959370981,5.38852099285496	7.10399e-08	2.08694e-05	1	Tacc2	transforming, acidic coiled-coil containing protein 2 [Source:MGI Symbol;Acc:MGI:1928899]	protein_coding	ENSMUST00000033141,ENSMUST00000059145,ENSMUST00000084513,ENSMUST00000207230,ENSMUST00000207282,ENSMUST00000207376,ENSMUST00000207395,ENSMUST00000207549,ENSMUST00000207789,ENSMUST00000207918,ENSMUST00000207999,ENSMUST00000208106,ENSMUST00000208661,ENSMUST00000208722,ENSMUST00000208743,ENSMUST00000208882,ENSMUST00000209108	+	chr7	130577438	130764785	47.96
ENSMUSG00000060548	0.642851	337.407689215548,0.119734697575956,5.36896310645224	7.91906e-08	2.27891e-05	1	Tnfrsf19	tumor necrosis factor receptor superfamily, member 19 [Source:MGI Symbol;Acc:MGI:1352474]	protein_coding	ENSMUST00000111234,ENSMUST00000111236	-	chr14	60963834	61046855	44.78
ENSMUSG00000034457	0.509925	469.336645657816,0.0952328290144966,5.35451334239322	8.5787e-08	2.3705e-05	0	Eda2r	ectodysplasin A2 receptor [Source:MGI Symbol;Acc:MGI:2442860]	protein_coding	ENSMUST00000037353,ENSMUST00000113832,ENSMUST00000126283,ENSMUST00000126609	-	chrX	97333840	97377216	37.05
ENSMUSG00000025129	-0.750927	1852.42642889869,0.140326064601358,-5.35129782479576	8.73257e-08	2.3705e-05	-1	Ppp1r27	protein phosphatase 1, regulatory subunit 27 [Source:MGI Symbol;Acc:MGI:1915951]	protein_coding	ENSMUST00000026121	-	chr11	120549979	120551132	53.29
ENSMUSG00000047370	6.27779	11.5041360838528,1.17317609898485,5.35110961846755	8.74165e-08	2.3705e-05	1	Gm7367	predicted pseudogene 7367 [Source:MGI Symbol;Acc:MGI:3646404]	processed_pseudogene	ENSMUST00000057611	+	chr7	60155609	60156100	63.41
ENSMUSG00000010492	0.491651	555.649446621842,0.0924914880761953,5.31563678007913	1.06285e-07	2.82778e-05	0	Uckl1os	uridine-cytidine kinase 1-like 1, opposite strand [Source:MGI Symbol;Acc:MGI:3801877]	antisense	ENSMUST00000122831,ENSMUST00000123110,ENSMUST00000126672,ENSMUST00000136759,ENSMUST00000148004,ENSMUST00000148847,ENSMUST00000152365	+	chr2	181578480	181585170	52.8
ENSMUSG00000070424	0.70693	348.981675184316,0.133611853604945,5.29091909776675	1.21703e-07	3.17803e-05	1	Art5	ADP-ribosyltransferase 5 [Source:MGI Symbol;Acc:MGI:107948]	protein_coding	ENSMUST00000094128,ENSMUST00000106934,ENSMUST00000106935,ENSMUST00000106937	-	chr7	102096879	102102845	52.91
ENSMUSG00000041959	-0.661324	419.056993953204,0.1251138264585,-5.28577665468525	1.25173e-07	3.2092e-05	-1	S100a10	S100 calcium binding protein A10 (calpactin) [Source:MGI Symbol;Acc:MGI:1339468]	protein_coding	ENSMUST00000045756,ENSMUST00000148400,ENSMUST00000170612	+	chr3	93555080	93564643	45.56
ENSMUSG00000045667	0.397833	3185.78024729039,0.075468377456111,5.27152303749396	1.35296e-07	3.40681e-05	0	Smtnl2	smoothelin-like 2 [Source:MGI Symbol;Acc:MGI:2442764]	protein_coding	ENSMUST00000050226,ENSMUST00000108500,ENSMUST00000125807,ENSMUST00000143345	-	chr11	72389164	72411713	52.09
ENSMUSG00000038342	0.456719	1663.42177945027,0.0871355587478511,5.24147220574091	1.593e-07	3.94087e-05	0	Mlxip	MLX interacting protein [Source:MGI Symbol;Acc:MGI:2141183]	protein_coding	ENSMUST00000068237,ENSMUST00000111596,ENSMUST00000135961,ENSMUST00000199458	+	chr5	123394798	123457932	45.66
ENSMUSG00000069662	-0.382379	908.66950516392,0.0734086775053058,-5.20890373505977	1.8996e-07	4.61831e-05	0	Marcks	myristoylated alanine rich protein kinase C substrate [Source:MGI Symbol;Acc:MGI:96907]	protein_coding	ENSMUST00000092584	-	chr10	37133375	37138920	48.59
ENSMUSG00000038777	0.342713	1398.07582150282,0.0658489143625646,5.20453737899582	1.9448e-07	4.64808e-05	0	Sema6c	sema domain, transmembrane domain (TM), and cytoplasmic domain, (semaphorin) 6C [Source:MGI Symbol;Acc:MGI:1338032]	protein_coding	ENSMUST00000090821,ENSMUST00000090823,ENSMUST00000107217,ENSMUST00000126597,ENSMUST00000130662,ENSMUST00000130814,ENSMUST00000131620,ENSMUST00000131742,ENSMUST00000134125,ENSMUST00000141607,ENSMUST00000142306,ENSMUST00000142449,ENSMUST00000168321,ENSMUST00000202315,ENSMUST00000204709	+	chr3	95160457	95174024	56.46
ENSMUSG00000026628	-1.5137	110.29743628062,0.291088606633519,-5.20014859502655	1.99129e-07	4.67987e-05	-1	Atf3	activating transcription factor 3 [Source:MGI Symbol;Acc:MGI:109384]	protein_coding	ENSMUST00000027941,ENSMUST00000131854,ENSMUST00000195117	-	chr1	191170296	191218039	46.24
ENSMUSG00000018547	0.361519	1031.55340435409,0.0695812099889729,5.19563440585982	2.04023e-07	4.71627e-05	0	Pip4k2b	phosphatidylinositol-5-phosphate 4-kinase, type II, beta [Source:MGI Symbol;Acc:MGI:1934234]	protein_coding	ENSMUST00000018691,ENSMUST00000144012	-	chr11	97715157	97744704	50.14
ENSMUSG00000026547	-0.756506	358.687315868292,0.146001476666446,-5.18149825284468	2.20111e-07	5.0061e-05	-1	Tagln2	transgelin 2 [Source:MGI Symbol;Acc:MGI:1312985]	protein_coding	ENSMUST00000111228,ENSMUST00000111230,ENSMUST00000138296,ENSMUST00000192460	+	chr1	172500047	172507380	55.17
ENSMUSG00000049775	-0.39885	2591.52063171286,0.0779429381295005,-5.11720721728864	3.10093e-07	6.94067e-05	0	Tmsb4x	thymosin, beta 4, X chromosome [Source:MGI Symbol;Acc:MGI:99510]	protein_coding	ENSMUST00000112172,ENSMUST00000112175,ENSMUST00000112176	-	chrX	167207093	167209315	47.77
ENSMUSG00000085148	0.532116	321.390019901785,0.104177154501875,5.10780154917359	3.25929e-07	7.18113e-05	0	Mir22hg	Mir22 host gene (non-protein coding) [Source:MGI Symbol;Acc:MGI:1914348]	processed_transcript	ENSMUST00000134345,ENSMUST00000149940	+	chr11	75461539	75466676	51.17
ENSMUSG00000036611	0.355528	2047.54036202667,0.069720457108092,5.09933883118671	3.40842e-07	7.39417e-05	0	Eepd1	endonuclease/exonuclease/phosphatase family domain containing 1 [Source:MGI Symbol;Acc:MGI:1914734]	protein_coding	ENSMUST00000040677,ENSMUST00000156237	+	chr9	25481547	25604110	44.66
ENSMUSG00000059890	0.376786	943.557268935421,0.0740730373773725,5.08667570619114	3.64394e-07	7.78534e-05	0	Ube4a	ubiquitination factor E4A [Source:MGI Symbol;Acc:MGI:2154580]	protein_coding	ENSMUST00000117506,ENSMUST00000117549,ENSMUST00000125642,ENSMUST00000138559,ENSMUST00000145657,ENSMUST00000154287,ENSMUST00000155400	-	chr9	44923131	44965600	43.34
ENSMUSG00000027248	-0.686212	1273.56414226479,0.13522148126907,-5.0747232936396	3.8806e-07	8.16722e-05	-1	Pdia3	protein disulfide isomerase associated 3 [Source:MGI Symbol;Acc:MGI:95834]	protein_coding	ENSMUST00000028683,ENSMUST00000130450,ENSMUST00000135079,ENSMUST00000153378	+	chr2	121413775	121438687	41.69
ENSMUSG00000026469	0.30582	1884.55503605262,0.0603197131605941,5.06998024800413	3.97857e-07	8.25027e-05	0	Xpr1	xenotropic and polytropic retrovirus receptor 1 [Source:MGI Symbol;Acc:MGI:97932]	protein_coding	ENSMUST00000027741,ENSMUST00000111774,ENSMUST00000111775,ENSMUST00000129271,ENSMUST00000139925,ENSMUST00000143529,ENSMUST00000192359	-	chr1	155275701	155417415	39.76
ENSMUSG00000022803	0.366676	751.482431321135,0.0724811211997617,5.05891322143636	4.21653e-07	8.61699e-05	0	Popdc2	popeye domain containing 2 [Source:MGI Symbol;Acc:MGI:1930150]	protein_coding	ENSMUST00000023494,ENSMUST00000114739,ENSMUST00000127892,ENSMUST00000141189,ENSMUST00000146342	+	chr16	38362209	38378216	49.54
ENSMUSG00000030433	0.588719	306.20028846943,0.116601267358006,5.04899117893308	4.44149e-07	8.94707e-05	1	Sbk2	SH3-binding domain kinase family, member 2 [Source:MGI Symbol;Acc:MGI:2685925]	protein_coding	ENSMUST00000032598,ENSMUST00000182214,ENSMUST00000182837,ENSMUST00000183170,ENSMUST00000208109	-	chr7	4940512	4964406	49.57
ENSMUSG00000050069	-0.871458	218.193437215704,0.17273198107174,-5.04514590750156	4.53175e-07	9.00032e-05	-1	Grem2	gremlin 2, DAN family BMP antagonist [Source:MGI Symbol;Acc:MGI:1344367]	protein_coding	ENSMUST00000055294	-	chr1	174833785	174921819	40.91
ENSMUSG00000027204	-0.516369	1114.68816325707,0.102499287611535,-5.03777967807259	4.70963e-07	9.22368e-05	0	Fbn1	fibrillin 1 [Source:MGI Symbol;Acc:MGI:95489]	protein_coding	ENSMUST00000028633,ENSMUST00000103234,ENSMUST00000148272	-	chr2	125300594	125507993	43.38
ENSMUSG00000032648	0.202518	73859.5864423138,0.0403283708429318,5.02171752254699	5.12115e-07	9.89223e-05	0	Pygm	muscle glycogen phosphorylase [Source:MGI Symbol;Acc:MGI:97830]	protein_coding	ENSMUST00000035269,ENSMUST00000113483,ENSMUST00000139775,ENSMUST00000142755	+	chr19	6384399	6398459	52.41
ENSMUSG00000021866	0.251472	1626.28072109216,0.0506537515282131,4.96452706329032	6.88687e-07	0.000131232	0	Anxa11	annexin A11 [Source:MGI Symbol;Acc:MGI:108481]	protein_coding	ENSMUST00000022416,ENSMUST00000112364,ENSMUST00000124704,ENSMUST00000133547	+	chr14	25842156	25886804	49.77
ENSMUSG00000040152	-0.770344	279.492199794513,0.155541786371246,-4.95265188472456	7.32089e-07	0.000137302	-1	Thbs1	thrombospondin 1 [Source:MGI Symbol;Acc:MGI:98737]	protein_coding	ENSMUST00000039559,ENSMUST00000142588	+	chr2	118111876	118127133	47.01
ENSMUSG00000028017	0.426973	774.315154865131,0.0862474051293605,4.95055627215427	7.40017e-07	0.000137302	0	Egf	epidermal growth factor [Source:MGI Symbol;Acc:MGI:95290]	protein_coding	ENSMUST00000029653,ENSMUST00000197079,ENSMUST00000197250,ENSMUST00000197713,ENSMUST00000198093,ENSMUST00000198816,ENSMUST00000199209,ENSMUST00000199272,ENSMUST00000199615	-	chr3	129677565	129755316	43.94
ENSMUSG00000049103	-0.883815	131.203375101193,0.178743976218874,-4.94458494263842	7.63063e-07	0.00013974	-1	Ccr2	chemokine (C-C motif) receptor 2 [Source:MGI Symbol;Acc:MGI:106185]	protein_coding	ENSMUST00000055918,ENSMUST00000165984,ENSMUST00000168841,ENSMUST00000171719	+	chr9	124101950	124113557	38.86
ENSMUSG00000030208	-0.534304	1116.0120537675,0.108868772450205,-4.9077824779556	9.21119e-07	0.000166522	0	Emp1	epithelial membrane protein 1 [Source:MGI Symbol;Acc:MGI:107941]	protein_coding	ENSMUST00000032330,ENSMUST00000111907,ENSMUST00000154270,ENSMUST00000204299,ENSMUST00000204894,ENSMUST00000205156	+	chr6	135362545	135383173	46.2
ENSMUSG00000023153	0.357177	672.643268306748,0.073111677407343,4.88535912253607	1.03241e-06	0.000184278	0	Tmem52	transmembrane protein 52 [Source:MGI Symbol;Acc:MGI:1916921]	protein_coding	ENSMUST00000023920,ENSMUST00000131599,ENSMUST00000145796,ENSMUST00000178188,ENSMUST00000178238	+	chr4	155469114	155470858	60.06
ENSMUSG00000021877	-0.374459	669.262236868207,0.0770804143487738,-4.85802449324476	1.18563e-06	0.000208982	0	Arf4	ADP-ribosylation factor 4 [Source:MGI Symbol;Acc:MGI:99433]	protein_coding	ENSMUST00000022429,ENSMUST00000112318,ENSMUST00000166075,ENSMUST00000167376,ENSMUST00000171207,ENSMUST00000171282	+	chr14	26638074	26665084	38.75
ENSMUSG00000031849	-1.10163	188.090787800948,0.227128771654836,-4.85025080644337	1.23305e-06	0.000214197	-1	Comp	cartilage oligomeric matrix protein [Source:MGI Symbol;Acc:MGI:88469]	protein_coding	ENSMUST00000003659	+	chr8	70373548	70382065	56.45
ENSMUSG00000007877	0.356617	18788.7325080913,0.0735559849210386,4.84824338686091	1.2456e-06	0.000214197	0	Tcap	titin-cap [Source:MGI Symbol;Acc:MGI:1330233]	protein_coding	ENSMUST00000008021	+	chr11	98383811	98384953	60.37
ENSMUSG00000022816	-0.580278	1893.71022261791,0.120916700969309,-4.79899255634928	1.59466e-06	0.000270919	0	Fstl1	follistatin-like 1 [Source:MGI Symbol;Acc:MGI:102793]	protein_coding	ENSMUST00000114763,ENSMUST00000123077,ENSMUST00000125279,ENSMUST00000127495,ENSMUST00000135668,ENSMUST00000152579	+	chr16	37776873	37836514	45.48
ENSMUSG00000044786	0.756316	261.506725265288,0.157906944514673,4.78962938153998	1.6709e-06	0.000280492	1	Zfp36	zinc finger protein 36 [Source:MGI Symbol;Acc:MGI:99180]	protein_coding	ENSMUST00000051241,ENSMUST00000209061	-	chr7	28376784	28380253	55.13
ENSMUSG00000030701	0.415715	937.472966035719,0.0868405124539411,4.78711162768783	1.69199e-06	0.000280691	0	Plekhb1	pleckstrin homology domain containing, family B (evectins) member 1 [Source:MGI Symbol;Acc:MGI:1351469]	protein_coding	ENSMUST00000079176,ENSMUST00000107043,ENSMUST00000107044,ENSMUST00000107045,ENSMUST00000107046,ENSMUST00000107047,ENSMUST00000116287,ENSMUST00000135255,ENSMUST00000138830,ENSMUST00000139708,ENSMUST00000151123,ENSMUST00000208812	-	chr7	100642892	100662414	50.07
ENSMUSG00000051726	-1.25078	45.6601135786323,0.261409684620234,-4.78473567538988	1.71212e-06	0.000280729	-1	Kcnf1	potassium voltage-gated channel, subfamily F, member 1 [Source:MGI Symbol;Acc:MGI:2687399]	protein_coding	ENSMUST00000170580	-	chr12	17172100	17176888	54.17
ENSMUSG00000026837	-0.505434	618.711463530985,0.105699929844,-4.78178608866017	1.73745e-06	0.000281606	0	Col5a1	collagen, type V, alpha 1 [Source:MGI Symbol;Acc:MGI:88457]	protein_coding	ENSMUST00000028280,ENSMUST00000145423	+	chr2	27886425	28039514	51.15
ENSMUSG00000094800	-0.653455	223.365197352063,0.137245763738231,-4.76120539304129	1.9244e-06	0.000308363	-1	Gm9780	predicted gene 9780 [Source:MGI Symbol;Acc:MGI:3710532]	protein_coding	ENSMUST00000184272,ENSMUST00000184915	-	chr14	26027282	26042711	47.95
ENSMUSG00000023074	0.320376	1370.53789968985,0.0674361640324637,4.75081108390321	2.02602e-06	0.000321	0	Mospd1	motile sperm domain containing 1 [Source:MGI Symbol;Acc:MGI:1917630]	protein_coding	ENSMUST00000023836,ENSMUST00000096447,ENSMUST00000152743	-	chrX	53344598	53370502	41.07
ENSMUSG00000018411	0.397015	1250.42307757794,0.0838146264513464,4.73682799434431	2.17089e-06	0.000340131	0	Mapt	microtubule-associated protein tau [Source:MGI Symbol;Acc:MGI:97180]	protein_coding	ENSMUST00000100347,ENSMUST00000106988,ENSMUST00000106989,ENSMUST00000106992,ENSMUST00000106993,ENSMUST00000126820,ENSMUST00000132245,ENSMUST00000132977,ENSMUST00000138384,ENSMUST00000144836,ENSMUST00000145227,ENSMUST00000146353	+	chr11	104231390	104332090	49.31
ENSMUSG00000079278	0.256236	3054.73575620534,0.0541776109917782,4.72955165516486	2.25016e-06	0.000348676	0	Tmem233	transmembrane protein 233 [Source:MGI Symbol;Acc:MGI:3651514]	protein_coding	ENSMUST00000111997	-	chr5	116038755	116083244	46.39
ENSMUSG00000024413	0.572245	741.583902559111,0.121425986443239,4.71270636421281	2.44448e-06	0.00037467	0	Npc1	Niemann-Pick type C1 [Source:MGI Symbol;Acc:MGI:1097712]	protein_coding	ENSMUST00000025279,ENSMUST00000133112,ENSMUST00000144435,ENSMUST00000145771,ENSMUST00000149211	-	chr18	12189693	12236400	46.84
ENSMUSG00000020109	0.308059	894.507427392895,0.0655812254314714,4.69736187691526	2.63543e-06	0.000399594	0	Dnajb12	DnaJ heat shock protein family (Hsp40) member B12 [Source:MGI Symbol;Acc:MGI:1931881]	protein_coding	ENSMUST00000020309,ENSMUST00000131810,ENSMUST00000142819,ENSMUST00000146590,ENSMUST00000147914	+	chr10	59879556	59899302	52.15
ENSMUSG00000022893	-0.523584	729.410639195378,0.111539079346787,-4.69417490367099	2.67685e-06	0.000401556	0	Adamts1	a disintegrin-like and metallopeptidase (reprolysin type) with thrombospondin type 1 motif, 1 [Source:MGI Symbol;Acc:MGI:109249]	protein_coding	ENSMUST00000023610,ENSMUST00000125897,ENSMUST00000138474	-	chr16	85793827	85803113	46.73
ENSMUSG00000025920	0.323447	1068.87943452846,0.0689998905431072,4.68765187197675	2.76358e-06	0.000410202	0	Stau2	staufen (RNA binding protein) homolog 2 (Drosophila) [Source:MGI Symbol;Acc:MGI:1352508]	protein_coding	ENSMUST00000027052,ENSMUST00000054668,ENSMUST00000115359,ENSMUST00000115360,ENSMUST00000127420,ENSMUST00000128957,ENSMUST00000131257,ENSMUST00000144138,ENSMUST00000145092,ENSMUST00000149320,ENSMUST00000151888,ENSMUST00000153966,ENSMUST00000159558,ENSMUST00000162007,ENSMUST00000162435,ENSMUST00000162627,ENSMUST00000162751	-	chr1	16228674	16520112	40.73
ENSMUSG00000034472	0.486046	802.978604193988,0.104181283070664,4.66538306194846	3.08043e-06	0.00045247	0	Rasd2	RASD family, member 2 [Source:MGI Symbol;Acc:MGI:1922391]	protein_coding	ENSMUST00000132133,ENSMUST00000139848	+	chr8	75213944	75224113	52.93
ENSMUSG00000030934	0.254291	3234.01204390449,0.0546325114201945,4.65456991198377	3.24658e-06	0.000471959	0	Oat	ornithine aminotransferase [Source:MGI Symbol;Acc:MGI:97394]	protein_coding	ENSMUST00000084500	-	chr7	132557475	132576398	43.76
ENSMUSG00000069516	-0.649997	1506.46377479321,0.140129158094739,-4.6385538849189	3.50855e-06	0.000504838	-1	Lyz2	lysozyme 2 [Source:MGI Symbol;Acc:MGI:96897]	protein_coding	ENSMUST00000092163	-	chr10	117277334	117282274	47.1
ENSMUSG00000020782	0.768257	94.2200419217605,0.165880526278091,4.63138840802725	3.63222e-06	0.000517353	1	Llgl2	lethal giant larvae homolog 2 (Drosophila) [Source:MGI Symbol;Acc:MGI:1918843]	protein_coding	ENSMUST00000103032,ENSMUST00000128826,ENSMUST00000130518,ENSMUST00000132999,ENSMUST00000133250,ENSMUST00000137900,ENSMUST00000137951,ENSMUST00000147878,ENSMUST00000155878,ENSMUST00000172552,ENSMUST00000173289,ENSMUST00000177736	+	chr11	115824049	115855780	54.21
ENSMUSG00000053279	0.445822	2031.03305494627,0.0969213114771053,4.5998373475433	4.22821e-06	0.000592366	0	Aldh1a1	aldehyde dehydrogenase family 1, subfamily A1 [Source:MGI Symbol;Acc:MGI:1353450]	protein_coding	ENSMUST00000087638	+	chr19	20601961	20643462	37.66
ENSMUSG00000009013	-0.581768	408.715681571805,0.126495712518296,-4.59911551476033	4.24288e-06	0.000592366	0	Dynll1	dynein light chain LC8-type 1 [Source:MGI Symbol;Acc:MGI:1861457]	protein_coding	ENSMUST00000009157,ENSMUST00000112090,ENSMUST00000123292,ENSMUST00000125959,ENSMUST00000127552,ENSMUST00000202980	-	chr5	115297110	115300999	50.54
ENSMUSG00000067149	-2.78286	43.0919484209167,0.605878294540602,-4.5930999392006	4.3671e-06	0.00060373	-1	Jchain	immunoglobulin joining chain [Source:MGI Symbol;Acc:MGI:96493]	protein_coding	ENSMUST00000087033,ENSMUST00000164073	-	chr5	88519809	88527891	36.78
ENSMUSG00000026043	-0.504119	4047.73899811232,0.109865300927584,-4.58851526682795	4.4641e-06	0.000611148	0	Col3a1	collagen, type III, alpha 1 [Source:MGI Symbol;Acc:MGI:88453]	protein_coding	ENSMUST00000087883,ENSMUST00000123204,ENSMUST00000129611,ENSMUST00000185687,ENSMUST00000186021,ENSMUST00000189818,ENSMUST00000190943	+	chr1	45311538	45349706	35.86
ENSMUSG00000043079	0.340103	2215.61797295649,0.0742834583076204,4.57845388300155	4.68425e-06	0.000632108	0	Synpo	synaptopodin [Source:MGI Symbol;Acc:MGI:1099446]	protein_coding	ENSMUST00000097566,ENSMUST00000115318,ENSMUST00000123288,ENSMUST00000128528,ENSMUST00000130044,ENSMUST00000130360,ENSMUST00000137894,ENSMUST00000139236,ENSMUST00000143275,ENSMUST00000154857,ENSMUST00000155195,ENSMUST00000160395	-	chr18	60593973	60660142	51.16
ENSMUSG00000052276	-0.666815	535.223262726631,0.145673964464784,-4.57744695589852	4.70685e-06	0.000632108	-1	Ostn	osteocrin [Source:MGI Symbol;Acc:MGI:2677164]	protein_coding	ENSMUST00000066852	+	chr16	27307489	27351212	37.28
ENSMUSG00000021226	0.864497	224.329956239686,0.189151783308667,4.57038642933215	4.86826e-06	0.000647616	1	Acot2	acyl-CoA thioesterase 2 [Source:MGI Symbol;Acc:MGI:2159605]	protein_coding	ENSMUST00000021649	+	chr12	83987861	83993873	49.53
ENSMUSG00000049225	0.428281	1309.31256315221,0.0939245163893788,4.55984481206797	5.11914e-06	0.000674627	0	Pdp1	pyruvate dehyrogenase phosphatase catalytic subunit 1 [Source:MGI Symbol;Acc:MGI:2685870]	protein_coding	ENSMUST00000056050,ENSMUST00000095144,ENSMUST00000108297,ENSMUST00000108299,ENSMUST00000108301,ENSMUST00000108302	-	chr4	11958184	11966452	40.05
ENSMUSG00000026407	0.262588	14967.2511890017,0.0576289153325606,4.55652939723942	5.20058e-06	0.000679012	0	Cacna1s	calcium channel, voltage-dependent, L type, alpha 1S subunit [Source:MGI Symbol;Acc:MGI:88294]	protein_coding	ENSMUST00000112064,ENSMUST00000112068,ENSMUST00000159106,ENSMUST00000160641,ENSMUST00000161700,ENSMUST00000161865	+	chr1	136052750	136119822	49.87
ENSMUSG00000032575	-0.721705	248.105558205587,0.159081530142147,-4.53670103387489	5.7141e-06	0.000739216	-1	Manf	mesencephalic astrocyte-derived neurotrophic factor [Source:MGI Symbol;Acc:MGI:1922090]	protein_coding	ENSMUST00000069036,ENSMUST00000159283,ENSMUST00000159620,ENSMUST00000160503,ENSMUST00000160978,ENSMUST00000161272,ENSMUST00000162801	-	chr9	106838312	106891979	43.69
ENSMUSG00000038526	0.639658	366.381841522553,0.141143314486211,4.53197319823861	5.84353e-06	0.000749087	1	Car14	carbonic anhydrase 14 [Source:MGI Symbol;Acc:MGI:1344341]	protein_coding	ENSMUST00000036181,ENSMUST00000126722,ENSMUST00000147962,ENSMUST00000149202	-	chr3	95897768	95904691	50.42
ENSMUSG00000018819	-0.460498	465.483438714596,0.102306800068176,-4.50115181047185	6.75862e-06	0.000858588	0	Lsp1	lymphocyte specific 1 [Source:MGI Symbol;Acc:MGI:96832]	protein_coding	ENSMUST00000018963,ENSMUST00000038946,ENSMUST00000105966,ENSMUST00000105967,ENSMUST00000105968,ENSMUST00000126149,ENSMUST00000128986,ENSMUST00000132956,ENSMUST00000140626,ENSMUST00000142408,ENSMUST00000149521,ENSMUST00000156960	+	chr7	142460809	142494867	52.57
ENSMUSG00000020793	-1.20598	47.6991287795171,0.268297902830915,-4.49493082729634	6.95926e-06	0.000876183	-1	Galr2	galanin receptor 2 [Source:MGI Symbol;Acc:MGI:1337018]	protein_coding	ENSMUST00000055872,ENSMUST00000154277	+	chr11	116280939	116283938	56.57
ENSMUSG00000043131	-0.558484	575.611868765142,0.124552276192044,-4.4839348333309	7.3279e-06	0.000909976	0	Mob1a	MOB kinase activator 1A [Source:MGI Symbol;Acc:MGI:2442631]	protein_coding	ENSMUST00000038658,ENSMUST00000055261,ENSMUST00000101245,ENSMUST00000133045,ENSMUST00000146420,ENSMUST00000155580	+	chr6	83326016	83343776	41.91
ENSMUSG00000090877	-1.08081	153.987935744531,0.241118803126852,-4.48249297957712	7.37761e-06	0.000909976	-1	Hspa1b	heat shock protein 1B [Source:MGI Symbol;Acc:MGI:99517]	protein_coding	ENSMUST00000172753	-	chr17	34956436	34959238	58.12
ENSMUSG00000031906	-1.29646	135.748945976925,0.289308822530676,-4.48123413965708	7.42126e-06	0.000909976	-1	Smpd3	sphingomyelin phosphodiesterase 3, neutral [Source:MGI Symbol;Acc:MGI:1927578]	protein_coding	ENSMUST00000067512	-	chr8	106252548	106337988	47.6
ENSMUSG00000024381	0.287112	5899.57090169034,0.0646016309210444,4.44434763903275	8.8159e-06	0.00107166	0	Bin1	bridging integrator 1 [Source:MGI Symbol;Acc:MGI:108092]	protein_coding	ENSMUST00000025239,ENSMUST00000091967	+	chr18	32377217	32435736	50.38
ENSMUSG00000040723	0.297403	1394.0048234041,0.067268886044594,4.42110516227302	9.81974e-06	0.00118349	0	Rcsd1	RCSD domain containing 1 [Source:MGI Symbol;Acc:MGI:2676394]	protein_coding	ENSMUST00000040357,ENSMUST00000097474,ENSMUST00000192566,ENSMUST00000193714,ENSMUST00000195045	-	chr1	165646516	165709757	48.46
ENSMUSG00000067081	0.337819	548.191981187947,0.0765040513551608,4.4156944626161	1.00686e-05	0.00119729	0	Asb18	ankyrin repeat and SOCS box-containing 18 [Source:MGI Symbol;Acc:MGI:2655109]	protein_coding	ENSMUST00000086882,ENSMUST00000097656,ENSMUST00000151330,ENSMUST00000154228	-	chr1	89950220	90014666	47.42
ENSMUSG00000032495	0.444801	1885.12975536373,0.100749176666022,4.4149347158337	1.0104e-05	0.00119729	0	Lrrc2	leucine rich repeat containing 2 [Source:MGI Symbol;Acc:MGI:1921499]	protein_coding	ENSMUST00000035076,ENSMUST00000196598,ENSMUST00000196834	+	chr9	110951545	110984066	44.76
ENSMUSG00000027346	0.255767	7367.93080333366,0.0579836706057877,4.4110242992885	1.02883e-05	0.00120896	0	Gpcpd1	glycerophosphocholine phosphodiesterase 1 [Source:MGI Symbol;Acc:MGI:104898]	protein_coding	ENSMUST00000028822,ENSMUST00000060955,ENSMUST00000110135,ENSMUST00000110136,ENSMUST00000110142,ENSMUST00000124107,ENSMUST00000124632,ENSMUST00000127712,ENSMUST00000131617,ENSMUST00000140867,ENSMUST00000145694,ENSMUST00000148833,ENSMUST00000149854	-	chr2	132529082	132587729	39.28
ENSMUSG00000026728	-0.429907	2354.734387097,0.0977083302696191,-4.399897437875	1.08302e-05	0.00125846	0	Vim	vimentin [Source:MGI Symbol;Acc:MGI:98932]	protein_coding	ENSMUST00000028062,ENSMUST00000141365,ENSMUST00000148248,ENSMUST00000155605,ENSMUST00000191615,ENSMUST00000193675	+	chr2	13573927	13582826	43.54
ENSMUSG00000020027	-1.2559	748.115658218445,0.285512991125619,-4.39874154212161	1.0888e-05	0.00125846	-1	Socs2	suppressor of cytokine signaling 2 [Source:MGI Symbol;Acc:MGI:1201787]	protein_coding	ENSMUST00000020215,ENSMUST00000119917,ENSMUST00000128363,ENSMUST00000128854,ENSMUST00000129942,ENSMUST00000130784,ENSMUST00000134918,ENSMUST00000135822,ENSMUST00000139210,ENSMUST00000145847,ENSMUST00000150432,ENSMUST00000155148,ENSMUST00000170690,ENSMUST00000172070	-	chr10	95385362	95417180	45.87
ENSMUSG00000020580	-0.308055	3410.32045093227,0.0702603524439291,-4.38447680256552	1.16265e-05	0.00133289	0	Rock2	Rho-associated coiled-coil containing protein kinase 2 [Source:MGI Symbol;Acc:MGI:107926]	protein_coding	ENSMUST00000020904	+	chr12	16894978	16988274	37.14
ENSMUSG00000032042	0.204445	4738.86737432644,0.0466542470977764,4.38213970700274	1.17519e-05	0.0013364	0	Srpr	signal recognition particle receptor ('docking protein') [Source:MGI Symbol;Acc:MGI:1914648]	protein_coding	ENSMUST00000034541,ENSMUST00000132799,ENSMUST00000138287,ENSMUST00000154005	+	chr9	35200175	35247973	43.13
ENSMUSG00000031600	0.269835	1584.98320136376,0.0617287790732443,4.37130761870881	1.23505e-05	0.00138468	0	Vps37a	vacuolar protein sorting 37A (yeast) [Source:MGI Symbol;Acc:MGI:1261835]	protein_coding	ENSMUST00000098817	+	chr8	40511783	40551134	39.15
ENSMUSG00000032011	-0.619185	277.29158945039,0.141660417106885,-4.37091187293855	1.23729e-05	0.00138468	-1	Thy1	thymus cell antigen 1, theta [Source:MGI Symbol;Acc:MGI:98747]	protein_coding	ENSMUST00000114840	+	chr9	44043384	44048579	53.87
ENSMUSG00000030116	-0.642891	401.52247898007,0.14719597289748,-4.36758647750741	1.25627e-05	0.00139486	-1	Mfap5	microfibrillar associated protein 5 [Source:MGI Symbol;Acc:MGI:1354387]	protein_coding	ENSMUST00000032210,ENSMUST00000118626,ENSMUST00000121656,ENSMUST00000125728,ENSMUST00000126357,ENSMUST00000142896,ENSMUST00000148517	+	chr6	122505845	122529290	45.87
ENSMUSG00000027907	-0.753872	325.744591829914,0.172793217170523,-4.36285602857658	1.28375e-05	0.00141424	-1	S100a11	S100 calcium binding protein A11 [Source:MGI Symbol;Acc:MGI:1338798]	protein_coding	ENSMUST00000029515	+	chr3	93520488	93526287	45.29
ENSMUSG00000031137	0.391405	503.981628591661,0.0899678402794984,4.35050322012893	1.35825e-05	0.00148471	0	Fgf13	fibroblast growth factor 13 [Source:MGI Symbol;Acc:MGI:109178]	protein_coding	ENSMUST00000033473,ENSMUST00000119306,ENSMUST00000119833,ENSMUST00000123660,ENSMUST00000124402,ENSMUST00000131319,ENSMUST00000138503,ENSMUST00000145767,ENSMUST00000150413	-	chrX	59062145	59568071	37.94
ENSMUSG00000001687	0.304834	1732.89732176026,0.0701657633465158,4.3444792442763	1.39606e-05	0.0015143	0	Ubl3	ubiquitin-like 3 [Source:MGI Symbol;Acc:MGI:1344373]	protein_coding	ENSMUST00000079324,ENSMUST00000164904,ENSMUST00000201139,ENSMUST00000201595,ENSMUST00000201597,ENSMUST00000201688,ENSMUST00000202938	-	chr5	148504635	148552789	42.33
ENSMUSG00000038910	0.316101	863.291402257604,0.0728671782222139,4.338048170545	1.43754e-05	0.00154738	0	Plcl2	phospholipase C-like 2 [Source:MGI Symbol;Acc:MGI:1352756]	protein_coding	ENSMUST00000043938	+	chr17	50509547	50688493	41.74
ENSMUSG00000020794	0.282857	2468.30460873319,0.0653335333656028,4.32943794745278	1.4949e-05	0.00159694	0	Ube2g1	ubiquitin-conjugating enzyme E2G 1 [Source:MGI Symbol;Acc:MGI:1914378]	protein_coding	ENSMUST00000021148,ENSMUST00000126046,ENSMUST00000138247	+	chr11	72607283	72686481	38.39
ENSMUSG00000047139	0.348943	4005.92478503672,0.0810440749951686,4.30558936559774	1.66542e-05	0.00176572	0	Cd24a	CD24a antigen [Source:MGI Symbol;Acc:MGI:88323]	protein_coding	ENSMUST00000058714	+	chr10	43579169	43584262	46.72
ENSMUSG00000022150	-0.439068	373.850495308493,0.102152080878234,-4.29817615319569	1.72209e-05	0.00181218	0	Dab2	disabled 2, mitogen-responsive phosphoprotein [Source:MGI Symbol;Acc:MGI:109175]	protein_coding	ENSMUST00000078019,ENSMUST00000080880,ENSMUST00000110663,ENSMUST00000110664,ENSMUST00000159046,ENSMUST00000159490,ENSMUST00000159552,ENSMUST00000160134,ENSMUST00000161040,ENSMUST00000161558,ENSMUST00000161812,ENSMUST00000162094,ENSMUST00000162140,ENSMUST00000163082	+	chr15	6299788	6440712	41.15
ENSMUSG00000050211	0.518288	296.841137504665,0.121229178403186,4.27527522147238	1.90901e-05	0.001994	0	Pla2g4e	phospholipase A2, group IVE [Source:MGI Symbol;Acc:MGI:1919144]	protein_coding	ENSMUST00000090071,ENSMUST00000127009,ENSMUST00000136845,ENSMUST00000152263	-	chr2	120166412	120245335	46.53
ENSMUSG00000000184	-0.469362	351.032963807895,0.110367491929892,-4.2527172891588	2.11192e-05	0.00218972	0	Ccnd2	cyclin D2 [Source:MGI Symbol;Acc:MGI:88314]	protein_coding	ENSMUST00000000188,ENSMUST00000201066,ENSMUST00000201564,ENSMUST00000201637,ENSMUST00000201857,ENSMUST00000201902,ENSMUST00000201985,ENSMUST00000202363	-	chr6	127125162	127152193	49.26
ENSMUSG00000030306	0.273745	2343.47619546692,0.064484017541641,4.24516172698634	2.18436e-05	0.00224829	0	Tmtc1	transmembrane and tetratricopeptide repeat containing 1 [Source:MGI Symbol;Acc:MGI:3039590]	protein_coding	ENSMUST00000060095,ENSMUST00000100772,ENSMUST00000140797,ENSMUST00000203991	-	chr6	148232430	148444389	42.92
ENSMUSG00000001419	0.25406	2743.15506837049,0.0598766886683584,4.24305372484469	2.20499e-05	0.00224853	0	Mef2d	myocyte enhancer factor 2D [Source:MGI Symbol;Acc:MGI:99533]	protein_coding	ENSMUST00000001455,ENSMUST00000107558,ENSMUST00000107559,ENSMUST00000119251,ENSMUST00000139153,ENSMUST00000140927,ENSMUST00000152861	+	chr3	88142372	88172086	52.66
ENSMUSG00000020661	0.32471	807.608717213026,0.0765485738236674,4.24188728235605	2.21648e-05	0.00224853	0	Dnmt3a	DNA methyltransferase 3A [Source:MGI Symbol;Acc:MGI:1261827]	protein_coding	ENSMUST00000020991,ENSMUST00000085826,ENSMUST00000111186,ENSMUST00000172509,ENSMUST00000172689,ENSMUST00000172719,ENSMUST00000172749,ENSMUST00000172816,ENSMUST00000172879,ENSMUST00000172913,ENSMUST00000173197,ENSMUST00000173700,ENSMUST00000174102,ENSMUST00000174272,ENSMUST00000174483,ENSMUST00000174733,ENSMUST00000174774,ENSMUST00000174817	+	chr12	3806007	3914443	51.22
ENSMUSG00000039395	-0.534473	536.789548903826,0.126231781275551,-4.23405961757496	2.2951e-05	0.00231166	0	Mreg	melanoregulin [Source:MGI Symbol;Acc:MGI:2151839]	protein_coding	ENSMUST00000048860	-	chr1	72159442	72212307	46.44
ENSMUSG00000092274	0.311023	9593.75708209538,0.0735994695124349,4.22588721508854	2.38001e-05	0.00238018	0	Neat1	nuclear paraspeckle assembly transcript 1 (non-protein coding) [Source:MGI Symbol;Acc:MGI:1914211]	lincRNA	ENSMUST00000173672,ENSMUST00000174287,ENSMUST00000174829	-	chr19	5824708	5845478	47.27
ENSMUSG00000028035	-0.470336	1832.10637273126,0.111448731652984,-4.22020243591614	2.44083e-05	0.00242381	0	Dnajb4	DnaJ heat shock protein family (Hsp40) member B4 [Source:MGI Symbol;Acc:MGI:1914285]	protein_coding	ENSMUST00000029669,ENSMUST00000050073,ENSMUST00000134701,ENSMUST00000144950,ENSMUST00000153355,ENSMUST00000196291,ENSMUST00000197941	-	chr3	152178511	152210302	39.95
ENSMUSG00000024981	-1.00387	190.505590788786,0.238238814988734,-4.21371771535029	2.51201e-05	0.00247705	-1	Acsl5	acyl-CoA synthetase long-chain family member 5 [Source:MGI Symbol;Acc:MGI:1919129]	protein_coding	ENSMUST00000043150	+	chr19	55253369	55296627	43.97
ENSMUSG00000037902	-0.481307	283.499181291914,0.114713201130186,-4.19574609811243	2.71975e-05	0.0026377	0	Sirpa	signal-regulatory protein alpha [Source:MGI Symbol;Acc:MGI:108563]	protein_coding	ENSMUST00000049262,ENSMUST00000099113,ENSMUST00000103202,ENSMUST00000103203,ENSMUST00000127751,ENSMUST00000136153,ENSMUST00000136554,ENSMUST00000153491,ENSMUST00000160276,ENSMUST00000160952,ENSMUST00000161620,ENSMUST00000162764,ENSMUST00000163034,ENSMUST00000179001	+	chr2	129592835	129632228	50.09
ENSMUSG00000016494	-0.452566	1539.66026768476,0.107877265112485,-4.19518933776472	2.72644e-05	0.0026377	0	Cd34	CD34 antigen [Source:MGI Symbol;Acc:MGI:88329]	protein_coding	ENSMUST00000016638,ENSMUST00000110815,ENSMUST00000194036,ENSMUST00000194458,ENSMUST00000195092	+	chr1	194938819	194961279	41.05
ENSMUSG00000031328	-0.363254	979.066783245451,0.086607243163693,-4.19426494815245	2.73758e-05	0.0026377	0	Flna	filamin, alpha [Source:MGI Symbol;Acc:MGI:95556]	protein_coding	ENSMUST00000033699,ENSMUST00000101454,ENSMUST00000114299,ENSMUST00000124950,ENSMUST00000127463,ENSMUST00000127924,ENSMUST00000130007,ENSMUST00000130203,ENSMUST00000133174,ENSMUST00000133288,ENSMUST00000133609,ENSMUST00000141528,ENSMUST00000144429,ENSMUST00000150554,ENSMUST00000156766	-	chrX	74223461	74249820	51.23
ENSMUSG00000051906	-0.781629	148.789535774923,0.186401293361574,-4.19325941372483	2.74975e-05	0.0026377	-1	Cd209f	CD209f antigen [Source:MGI Symbol;Acc:MGI:1916392]	protein_coding	ENSMUST00000128568,ENSMUST00000138439,ENSMUST00000145007,ENSMUST00000156276,ENSMUST00000207294	-	chr8	4102787	4105835	51.62
ENSMUSG00000034842	0.37216	1746.78119021999,0.0891381644328352,4.17509580222258	2.97861e-05	0.00281931	0	Art3	ADP-ribosyltransferase 3 [Source:MGI Symbol;Acc:MGI:1202729]	protein_coding	ENSMUST00000113083,ENSMUST00000117108,ENSMUST00000118106,ENSMUST00000119587,ENSMUST00000120193,ENSMUST00000120416,ENSMUST00000120781,ENSMUST00000121096,ENSMUST00000124509,ENSMUST00000125462,ENSMUST00000126281,ENSMUST00000128246,ENSMUST00000129222,ENSMUST00000135528,ENSMUST00000138003,ENSMUST00000138687,ENSMUST00000145072,ENSMUST00000152041,ENSMUST00000154245	+	chr5	92331827	92414628	44.88
ENSMUSG00000022791	0.362302	583.21466557287,0.0867777115159063,4.17506159365122	2.97905e-05	0.00281931	0	Tnk2	tyrosine kinase, non-receptor, 2 [Source:MGI Symbol;Acc:MGI:1858308]	protein_coding	ENSMUST00000115120,ENSMUST00000115121,ENSMUST00000115122,ENSMUST00000115123,ENSMUST00000115124,ENSMUST00000115125,ENSMUST00000115126,ENSMUST00000124585,ENSMUST00000131238,ENSMUST00000137044,ENSMUST00000145627,ENSMUST00000150383,ENSMUST00000152361,ENSMUST00000156614,ENSMUST00000164358,ENSMUST00000168506	+	chr16	32643874	32683493	52.35
ENSMUSG00000028098	-0.355524	1716.75614935362,0.085229918043113,-4.17134979596567	3.02801e-05	0.00284653	0	Rnf115	ring finger protein 115 [Source:MGI Symbol;Acc:MGI:1915095]	protein_coding	ENSMUST00000029740,ENSMUST00000199051,ENSMUST00000199974	+	chr3	96727664	96791638	41.63
ENSMUSG00000020777	0.270739	2966.25274595212,0.0650203200277762,4.16391529513522	3.12836e-05	0.00292139	0	Acox1	acyl-Coenzyme A oxidase 1, palmitoyl [Source:MGI Symbol;Acc:MGI:1330812]	protein_coding	ENSMUST00000066587,ENSMUST00000072948,ENSMUST00000124684,ENSMUST00000128793,ENSMUST00000130229,ENSMUST00000148601,ENSMUST00000150549	-	chr11	116171888	116199045	47.18
ENSMUSG00000049550	0.232224	6203.1973934834,0.0558346984332438,4.1591276673018	3.19465e-05	0.00296367	0	Clip1	CAP-GLY domain containing linker protein 1 [Source:MGI Symbol;Acc:MGI:1928401]	protein_coding	ENSMUST00000031382,ENSMUST00000063905,ENSMUST00000111561,ENSMUST00000111564,ENSMUST00000111566,ENSMUST00000125340,ENSMUST00000133545,ENSMUST00000137363,ENSMUST00000137602,ENSMUST00000144121,ENSMUST00000149410,ENSMUST00000154432,ENSMUST00000154672,ENSMUST00000198833,ENSMUST00000199018	-	chr5	123577795	123684618	45.31
ENSMUSG00000046480	0.2093	7545.50333196684,0.0504375205739595,4.14968231635863	3.32937e-05	0.0030453	0	Scn4b	sodium channel, type IV, beta [Source:MGI Symbol;Acc:MGI:2687406]	protein_coding	ENSMUST00000060125	+	chr9	45138437	45154152	51.83
ENSMUSG00000031824	-0.426782	371.644951910211,0.10286472381014,-4.14896289019105	3.33985e-05	0.0030453	0	6430548M08Rik	RIKEN cDNA 6430548M08 gene [Source:MGI Symbol;Acc:MGI:2443793]	protein_coding	ENSMUST00000034281,ENSMUST00000108948,ENSMUST00000108950,ENSMUST00000108951,ENSMUST00000132229,ENSMUST00000144682,ENSMUST00000153725	+	chr8	120114152	120165306	51.04
ENSMUSG00000001025	-0.424051	711.41116799475,0.102219389499264,-4.14844362392822	3.34743e-05	0.0030453	0	S100a6	S100 calcium binding protein A6 (calcyclin) [Source:MGI Symbol;Acc:MGI:1339467]	protein_coding	ENSMUST00000001051,ENSMUST00000197189,ENSMUST00000198128,ENSMUST00000200289	+	chr3	90612882	90624181	47.42
ENSMUSG00000029661	-0.579976	2620.96919909998,0.140521046586777,-4.1273255145378	3.67007e-05	0.00331741	0	Col1a2	collagen, type I, alpha 2 [Source:MGI Symbol;Acc:MGI:88468]	protein_coding	ENSMUST00000031668,ENSMUST00000124686,ENSMUST00000132029,ENSMUST00000138511,ENSMUST00000141483,ENSMUST00000148864,ENSMUST00000155687,ENSMUST00000203346	+	chr6	4504814	4541544	40.94
ENSMUSG00000004558	0.315685	18254.0231503815,0.076610491791146,4.12065003423862	3.77805e-05	0.00337188	0	Ndrg2	N-myc downstream regulated gene 2 [Source:MGI Symbol;Acc:MGI:1352498]	protein_coding	ENSMUST00000004673,ENSMUST00000111632	-	chr14	51905271	51913488	51.69
ENSMUSG00000020390	0.181975	9173.02687350724,0.0441616941599175,4.12064363671398	3.77815e-05	0.00337188	0	Ube2b	ubiquitin-conjugating enzyme E2B [Source:MGI Symbol;Acc:MGI:102944]	protein_coding	ENSMUST00000020657,ENSMUST00000109086,ENSMUST00000124699,ENSMUST00000147833	-	chr11	51985497	52000762	43.86
ENSMUSG00000049313	0.294466	1218.73636397359,0.0715299409581749,4.11667724738866	3.84374e-05	0.00340884	0	Sorl1	sortilin-related receptor, LDLR class A repeats-containing [Source:MGI Symbol;Acc:MGI:1202296]	protein_coding	ENSMUST00000060989,ENSMUST00000134560,ENSMUST00000139133,ENSMUST00000148800	-	chr9	41964720	42124297	46.67
ENSMUSG00000050315	0.244755	8996.37540678247,0.0596488712539546,4.10325506777084	4.07378e-05	0.00359027	0	Synpo2	synaptopodin 2 [Source:MGI Symbol;Acc:MGI:2153070]	protein_coding	ENSMUST00000051443,ENSMUST00000106426,ENSMUST00000106427,ENSMUST00000139160,ENSMUST00000184403,ENSMUST00000184590,ENSMUST00000198584	-	chr3	123076519	123236149	43.06
ENSMUSG00000026042	-0.561562	618.389707285964,0.13721034556508,-4.09270855258336	4.26363e-05	0.00373426	0	Col5a2	collagen, type V, alpha 2 [Source:MGI Symbol;Acc:MGI:88458]	protein_coding	ENSMUST00000086430,ENSMUST00000131535,ENSMUST00000134681,ENSMUST00000150143	-	chr1	45374321	45503282	36.19
ENSMUSG00000077450	0.320819	1164.57292759597,0.0785588411237338,4.08380319454161	4.43046e-05	0.00385641	0	Rab11b	RAB11B, member RAS oncogene family [Source:MGI Symbol;Acc:MGI:99425]	protein_coding	ENSMUST00000057373,ENSMUST00000172894,ENSMUST00000173860,ENSMUST00000173987,ENSMUST00000174744	-	chr17	33742484	33760530	49.09
ENSMUSG00000046447	-0.55765	258.449837220028,0.13670748697153,-4.07914803774175	4.5201e-05	0.00386831	0	Camk2n1	calcium/calmodulin-dependent protein kinase II inhibitor 1 [Source:MGI Symbol;Acc:MGI:1913509]	protein_coding	ENSMUST00000050918	+	chr4	138454314	138460123	55.23
ENSMUSG00000028410	-0.502193	1098.04548372737,0.123120875222947,-4.07886006073206	4.52571e-05	0.00386831	0	Dnaja1	DnaJ heat shock protein family (Hsp40) member A1 [Source:MGI Symbol;Acc:MGI:1270129]	protein_coding	ENSMUST00000030118,ENSMUST00000125442,ENSMUST00000126020,ENSMUST00000129204,ENSMUST00000137246,ENSMUST00000137476,ENSMUST00000139406,ENSMUST00000148976,ENSMUST00000149794,ENSMUST00000164233	+	chr4	40722150	40737149	41.72
ENSMUSG00000001020	-0.704776	130.099529267083,0.17278912496128,-4.07882311742168	4.52643e-05	0.00386831	-1	S100a4	S100 calcium binding protein A4 [Source:MGI Symbol;Acc:MGI:1330282]	protein_coding	ENSMUST00000001046,ENSMUST00000142476	+	chr3	90603771	90606045	48.53
ENSMUSG00000005583	0.222628	11993.0647997488,0.0546788739767094,4.07154813985409	4.67017e-05	0.00396711	0	Mef2c	myocyte enhancer factor 2C [Source:MGI Symbol;Acc:MGI:99458]	protein_coding	ENSMUST00000005722,ENSMUST00000163888,ENSMUST00000185052,ENSMUST00000195904,ENSMUST00000195984,ENSMUST00000196207,ENSMUST00000196493,ENSMUST00000196730,ENSMUST00000196832,ENSMUST00000197022,ENSMUST00000197145,ENSMUST00000197146,ENSMUST00000197681,ENSMUST00000197722,ENSMUST00000197938,ENSMUST00000198064,ENSMUST00000198069,ENSMUST00000198199,ENSMUST00000198217,ENSMUST00000198360,ENSMUST00000198916,…	+	chr13	83504034	83667080	37.5
ENSMUSG00000052681	-0.421072	720.609673704567,0.103520154636291,-4.06754045792881	4.7512e-05	0.00399385	0	Rap1b	RAS related protein 1b [Source:MGI Symbol;Acc:MGI:894315]	protein_coding	ENSMUST00000064667	-	chr10	117814471	117845935	42.21
ENSMUSG00000021215	0.39884	545.510818096586,0.0980626317464296,4.06719237212858	4.7583e-05	0.00399385	0	Net1	neuroepithelial cell transforming gene 1 [Source:MGI Symbol;Acc:MGI:1927138]	protein_coding	ENSMUST00000091853,ENSMUST00000099946	-	chr13	3882565	3918220	43.45
ENSMUSG00000000753	-0.413978	896.541866576949,0.101821547218006,-4.06572095688491	4.78842e-05	0.00399536	0	Serpinf1	serine (or cysteine) peptidase inhibitor, clade F, member 1 [Source:MGI Symbol;Acc:MGI:108080]	protein_coding	ENSMUST00000000769,ENSMUST00000125982,ENSMUST00000137103,ENSMUST00000138661,ENSMUST00000139403,ENSMUST00000155009,ENSMUST00000167281,ENSMUST00000168902	-	chr11	75409769	75422701	49.44
ENSMUSG00000028525	0.332668	1952.63012143836,0.0818838254944495,4.06268801624839	4.85108e-05	0.00402383	0	Pde4b	phosphodiesterase 4B, cAMP specific [Source:MGI Symbol;Acc:MGI:99557]	protein_coding	ENSMUST00000030251,ENSMUST00000097949,ENSMUST00000097950,ENSMUST00000106901,ENSMUST00000106904,ENSMUST00000106907,ENSMUST00000106908,ENSMUST00000106911,ENSMUST00000133632,ENSMUST00000172616,ENSMUST00000172845,ENSMUST00000173119,ENSMUST00000174186	+	chr4	102087543	102607259	40.42
ENSMUSG00000017144	-0.555869	172.322421452921,0.136898626473008,-4.06043908328339	4.89805e-05	0.00403903	0	Rnd3	Rho family GTPase 3 [Source:MGI Symbol;Acc:MGI:1921444]	protein_coding	ENSMUST00000017288,ENSMUST00000140864,ENSMUST00000154545	-	chr2	51130438	51149111	43.97
ENSMUSG00000076432	-0.640915	567.752405840458,0.157918647916363,-4.0585111762068	4.93866e-05	0.00404237	-1	Ywhaq	tyrosine 3-monooxygenase/tryptophan 5-monooxygenase activation protein, theta polypeptide [Source:MGI Symbol;Acc:MGI:891963]	protein_coding	ENSMUST00000049531,ENSMUST00000103002,ENSMUST00000135088,ENSMUST00000140710,ENSMUST00000146206,ENSMUST00000155480	-	chr12	21390071	21417637	40.64
ENSMUSG00000050708	-0.390472	2456.64408742244,0.096233871330081,-4.05753063789946	4.95943e-05	0.00404237	0	Ftl1	ferritin light polypeptide 1 [Source:MGI Symbol;Acc:MGI:95589]	protein_coding	ENSMUST00000094434	-	chr7	45457945	45459886	54.79
ENSMUSG00000031207	-0.385498	803.302628396139,0.0951259871514122,-4.05250181375962	5.06728e-05	0.00410654	0	Msn	moesin [Source:MGI Symbol;Acc:MGI:97167]	protein_coding	ENSMUST00000117399,ENSMUST00000135027,ENSMUST00000149985	+	chrX	96096042	96168552	41.25
ENSMUSG00000015932	-0.584935	638.569864847631,0.144608774674144,-4.04495108400874	5.23341e-05	0.00421693	0	Dstn	destrin [Source:MGI Symbol;Acc:MGI:1929270]	protein_coding	ENSMUST00000103172	+	chr2	143915320	143943324	42.57
ENSMUSG00000038668	-0.481368	231.251420630233,0.119296994716264,-4.03503823512202	5.45934e-05	0.00437399	0	Lpar1	lysophosphatidic acid receptor 1 [Source:MGI Symbol;Acc:MGI:108429]	protein_coding	ENSMUST00000055018,ENSMUST00000107570,ENSMUST00000107571,ENSMUST00000107574,ENSMUST00000107575,ENSMUST00000145361,ENSMUST00000147354,ENSMUST00000155170	-	chr4	58435255	58553898	42.4
ENSMUSG00000031740	-0.333677	757.290580665832,0.0827775470262,-4.03100996115772	5.55377e-05	0.0044245	0	Mmp2	matrix metallopeptidase 2 [Source:MGI Symbol;Acc:MGI:97009]	protein_coding	ENSMUST00000034187	+	chr8	92827328	92853417	48.48
ENSMUSG00000025404	0.281451	1777.09654723006,0.0698942023788927,4.02681235986885	5.65381e-05	0.00446218	0	R3hdm2	R3H domain containing 2 [Source:MGI Symbol;Acc:MGI:1919000]	protein_coding	ENSMUST00000064793,ENSMUST00000077046,ENSMUST00000105249,ENSMUST00000105250,ENSMUST00000105251,ENSMUST00000111628,ENSMUST00000163794,ENSMUST00000164161,ENSMUST00000164469,ENSMUST00000164831,ENSMUST00000165440,ENSMUST00000166820,ENSMUST00000168079,ENSMUST00000168268,ENSMUST00000168780,ENSMUST00000169888,ENSMUST00000170164,ENSMUST00000170336,ENSMUST00000171426,ENSMUST00000171434,ENSMUST00000171823	+	chr10	127380327	127499384	44.17
ENSMUSG00000030786	-1.11783	98.2777824581298,0.277626390881981,-4.02637432010344	5.66435e-05	0.00446218	-1	Itgam	integrin alpha M [Source:MGI Symbol;Acc:MGI:96607]	protein_coding	ENSMUST00000064821,ENSMUST00000106240,ENSMUST00000106242,ENSMUST00000119696,ENSMUST00000120355,ENSMUST00000156593	+	chr7	128062640	128118491	43.95
ENSMUSG00000029156	0.21461	1920.80729505389,0.0533462601683895,4.02296872700794	5.74691e-05	0.00450207	0	Sgcb	sarcoglycan, beta (dystrophin-associated glycoprotein) [Source:MGI Symbol;Acc:MGI:1346523]	protein_coding	ENSMUST00000081170,ENSMUST00000201416	-	chr5	73632749	73647790	45.03
ENSMUSG00000031375	-0.438556	1033.14996684102,0.10907835836223,-4.02055932760972	5.80601e-05	0.00452324	0	Bgn	biglycan [Source:MGI Symbol;Acc:MGI:88158]	protein_coding	ENSMUST00000033741,ENSMUST00000130873,ENSMUST00000133394,ENSMUST00000140803,ENSMUST00000141945,ENSMUST00000155231,ENSMUST00000169489,ENSMUST00000183174	+	chrX	73483602	73495933	50.34
ENSMUSG00000021486	-0.721012	195.958494703098,0.17976503919043,-4.01085848891749	6.04984e-05	0.00468729	-1	Prelid1	PRELI domain containing 1 [Source:MGI Symbol;Acc:MGI:1913744]	protein_coding	ENSMUST00000021942	+	chr13	55322055	55325271	52.47
ENSMUSG00000031666	0.269625	1118.17493408975,0.067317456398667,4.00527189960066	6.19462e-05	0.00476365	0	Rbl2	retinoblastoma-like 2 [Source:MGI Symbol;Acc:MGI:105085]	protein_coding	ENSMUST00000034091,ENSMUST00000126689,ENSMUST00000130336,ENSMUST00000141351,ENSMUST00000144190,ENSMUST00000145246,ENSMUST00000147361	+	chr8	91070057	91123844	42.56
ENSMUSG00000068747	0.309152	1517.89388407373,0.0772020588253463,4.00445925959529	6.21595e-05	0.00476365	0	Sort1	sortilin 1 [Source:MGI Symbol;Acc:MGI:1338015]	protein_coding	ENSMUST00000102632,ENSMUST00000129755,ENSMUST00000135636	+	chr3	108284082	108361511	45.52
ENSMUSG00000006154	1.14225	54.9185209157786,0.285545245685248,4.00022947036934	6.32811e-05	0.00480928	1	Eps8l1	EPS8-like 1 [Source:MGI Symbol;Acc:MGI:1914675]	protein_coding	ENSMUST00000086372,ENSMUST00000163137,ENSMUST00000163804,ENSMUST00000163893,ENSMUST00000164987,ENSMUST00000167068,ENSMUST00000167298,ENSMUST00000167599,ENSMUST00000167810,ENSMUST00000168924,ENSMUST00000169820,ENSMUST00000170423,ENSMUST00000170635,ENSMUST00000171445	+	chr7	4460674	4480487	50.56
ENSMUSG00000023990	0.262477	979.053053505995,0.0656326813158278,3.99918430519795	6.35612e-05	0.00480928	0	Tfeb	transcription factor EB [Source:MGI Symbol;Acc:MGI:103270]	protein_coding	ENSMUST00000024786,ENSMUST00000086932,ENSMUST00000113284,ENSMUST00000113288,ENSMUST00000124765,ENSMUST00000125177,ENSMUST00000126258,ENSMUST00000130208,ENSMUST00000137845,ENSMUST00000140715,ENSMUST00000141631,ENSMUST00000146782,ENSMUST00000159641,ENSMUST00000160373,ENSMUST00000162719	+	chr17	47737030	47792419	52.68
ENSMUSG00000033400	0.226983	13801.8585682861,0.0567804815495763,3.9975556451416	6.39999e-05	0.00480928	0	Agl	amylo-1,6-glucosidase, 4-alpha-glucanotransferase [Source:MGI Symbol;Acc:MGI:1924809]	protein_coding	ENSMUST00000040603,ENSMUST00000159670,ENSMUST00000159742,ENSMUST00000159995,ENSMUST00000160484,ENSMUST00000161336,ENSMUST00000162040,ENSMUST00000162792	-	chr3	116739999	116808166	41.88
ENSMUSG00000048701	0.265894	1219.60482388512,0.0665215897117858,3.99711499226334	6.41192e-05	0.00480928	0	Ccdc6	coiled-coil domain containing 6 [Source:MGI Symbol;Acc:MGI:1923801]	protein_coding	ENSMUST00000135607,ENSMUST00000145990,ENSMUST00000147545,ENSMUST00000156001	+	chr10	70097121	70193200	47.99
ENSMUSG00000029166	0.27768	942.664962880665,0.0694976538675453,3.99552793189478	6.45502e-05	0.00481599	0	Mapre3	microtubule-associated protein, RP/EB family, member 3 [Source:MGI Symbol;Acc:MGI:2140967]	protein_coding	ENSMUST00000031058,ENSMUST00000200692,ENSMUST00000201347,ENSMUST00000202025,ENSMUST00000202256,ENSMUST00000202501	+	chr5	30814641	30866106	47.53
ENSMUSG00000021820	0.242541	2577.78788646844,0.0607550840753879,3.99210531769875	6.54893e-05	0.00486034	0	Camk2g	calcium/calmodulin-dependent protein kinase II gamma [Source:MGI Symbol;Acc:MGI:88259]	protein_coding	ENSMUST00000071816,ENSMUST00000080440,ENSMUST00000100837	-	chr14	20734875	20794088	48.68
ENSMUSG00000090841	-0.274615	1008.07072332988,0.0688523590598616,-3.98846061885091	6.65034e-05	0.00490976	0	Myl6	myosin, light polypeptide 6, alkali, smooth muscle and non-muscle [Source:MGI Symbol;Acc:MGI:109318]	protein_coding	ENSMUST00000164181	-	chr10	128490860	128493875	53.08
ENSMUSG00000059895	0.395931	5889.77920950189,0.0995944177430409,3.97543306137402	7.02513e-05	0.00515945	0	Ptp4a3	protein tyrosine phosphatase 4a3 [Source:MGI Symbol;Acc:MGI:1277098]	protein_coding	ENSMUST00000053232,ENSMUST00000163582,ENSMUST00000165541,ENSMUST00000167582	+	chr15	73723145	73758766	55.7
ENSMUSG00000030695	0.242635	139544.907961649,0.061068686029051,3.97314265863173	7.09305e-05	0.00518234	0	Aldoa	aldolase A, fructose-bisphosphate [Source:MGI Symbol;Acc:MGI:87994]	protein_coding	ENSMUST00000032934,ENSMUST00000087566,ENSMUST00000106348,ENSMUST00000133514,ENSMUST00000135707,ENSMUST00000139657,ENSMUST00000141355,ENSMUST00000143509,ENSMUST00000147748,ENSMUST00000151137,ENSMUST00000153686,ENSMUST00000205336,ENSMUST00000205890,ENSMUST00000207534	-	chr7	126795234	126809108	52.02
ENSMUSG00000066279	0.597623	188.867675460529,0.150802766813087,3.96294580753272	7.40306e-05	0.00538096	1	Chrna10	cholinergic receptor, nicotinic, alpha polypeptide 10 [Source:MGI Symbol;Acc:MGI:3609260]	protein_coding	ENSMUST00000084830	-	chr7	102111266	102116713	51.76
ENSMUSG00000076609	-2.86298	113.176794195284,0.722711341436625,-3.96144898753335	7.44963e-05	0.00538704	-1	Igkc	immunoglobulin kappa constant [Source:MGI Symbol;Acc:MGI:96495]	IG_C_gene	ENSMUST00000103410	+	chr6	70726435	70726966	49.25
ENSMUSG00000009687	-0.966717	98.9852798689365,0.244299110460323,-3.9571044293499	7.58638e-05	0.00545793	-1	Fxyd5	FXYD domain-containing ion transport regulator 5 [Source:MGI Symbol;Acc:MGI:1201785]	protein_coding	ENSMUST00000009831,ENSMUST00000159753,ENSMUST00000159924,ENSMUST00000160006,ENSMUST00000160689,ENSMUST00000161259,ENSMUST00000161684,ENSMUST00000161805,ENSMUST00000162087,ENSMUST00000162116,ENSMUST00000162250,ENSMUST00000162733,ENSMUST00000202395,ENSMUST00000205301	-	chr7	31032722	31042481	51.78
ENSMUSG00000027187	0.408302	1824.91697946816,0.103334562352845,3.95125899289197	7.77411e-05	0.00556461	0	Cat	catalase [Source:MGI Symbol;Acc:MGI:88271]	protein_coding	ENSMUST00000028610,ENSMUST00000111168	-	chr2	103453849	103485160	44.55
ENSMUSG00000021258	0.351186	1272.94302628867,0.0889644599567105,3.94748380912459	7.89769e-05	0.00562451	0	Ccnk	cyclin K [Source:MGI Symbol;Acc:MGI:1276106]	protein_coding	ENSMUST00000101055	+	chr12	108179738	108203359	46.73
ENSMUSG00000071172	-0.404959	1143.11528078485,0.102655735097264,-3.94482308901922	7.98589e-05	0.00563123	0	Srsf3	serine/arginine-rich splicing factor 3 [Source:MGI Symbol;Acc:MGI:98285]	protein_coding	ENSMUST00000037776,ENSMUST00000130216,ENSMUST00000144551,ENSMUST00000147265,ENSMUST00000150157	+	chr17	29032673	29043366	40.69
ENSMUSG00000035697	-1.03025	85.4095666012701,0.261298383471494,-3.94281664580898	8.05302e-05	0.00563123	-1	Hmha1	histocompatibility (minor) HA-1 [Source:MGI Symbol;Acc:MGI:1917969]	protein_coding	ENSMUST00000043311,ENSMUST00000099501,ENSMUST00000105373,ENSMUST00000140974,ENSMUST00000150022	+	chr10	80016653	80031472	55.74
ENSMUSG00000011305	0.958246	234.853851280391,0.243049817086667,3.94258895071263	8.06067e-05	0.00563123	1	Plin5	perilipin 5 [Source:MGI Symbol;Acc:MGI:1914218]	protein_coding	ENSMUST00000019808,ENSMUST00000113072	-	chr17	56111601	56117596	55.1
ENSMUSG00000059498	-0.982498	128.5543140164,0.249233878978578,-3.94207174279705	8.07808e-05	0.00563123	-1	Fcgr3	Fc receptor, IgG, low affinity III [Source:MGI Symbol;Acc:MGI:95500]	protein_coding	ENSMUST00000164044,ENSMUST00000164179,ENSMUST00000168817,ENSMUST00000169017	-	chr1	171051174	171064935	46.41
ENSMUSG00000054640	0.551885	191.773400879294,0.140028998236106,3.94122072490327	8.1068e-05	0.00563123	0	Slc8a1	solute carrier family 8 (sodium/calcium exchanger), member 1 [Source:MGI Symbol;Acc:MGI:107956]	protein_coding	ENSMUST00000086538,ENSMUST00000163123,ENSMUST00000163680	-	chr17	81388691	81649607	40.08
ENSMUSG00000023460	0.327593	2337.62467316285,0.0833997116646854,3.92798785812666	8.56595e-05	0.00589214	0	Rab12	RAB12, member RAS oncogene family [Source:MGI Symbol;Acc:MGI:894284]	protein_coding	ENSMUST00000070538,ENSMUST00000135620,ENSMUST00000146279,ENSMUST00000155026,ENSMUST00000167962	-	chr17	66494512	66519717	46.7
ENSMUSG00000023994	-0.554297	154.406242973893,0.141114843572809,-3.92798703280302	8.56598e-05	0.00589214	0	Nfya	nuclear transcription factor-Y alpha [Source:MGI Symbol;Acc:MGI:97316]	protein_coding	ENSMUST00000046719,ENSMUST00000078800,ENSMUST00000159063,ENSMUST00000159237,ENSMUST00000159535,ENSMUST00000160319,ENSMUST00000160804,ENSMUST00000161117,ENSMUST00000161256,ENSMUST00000161603,ENSMUST00000161686,ENSMUST00000162460,ENSMUST00000163066	-	chr17	48386885	48409906	46.13
ENSMUSG00000024750	0.267518	6915.52599858058,0.0681480406718235,3.92554028311634	8.65353e-05	0.00592347	0	Zfand5	zinc finger, AN1-type domain 5 [Source:MGI Symbol;Acc:MGI:1278334]	protein_coding	ENSMUST00000025659,ENSMUST00000133175,ENSMUST00000141568,ENSMUST00000149144,ENSMUST00000152338	+	chr19	21272278	21282289	39.34
ENSMUSG00000036241	0.264806	2948.83856450135,0.0675024214309815,3.92290562462798	8.74874e-05	0.00594406	0	Ube2r2	ubiquitin-conjugating enzyme E2R 2 [Source:MGI Symbol;Acc:MGI:1914865]	protein_coding	ENSMUST00000040008,ENSMUST00000123642,ENSMUST00000129874	+	chr4	41135743	41193380	43.31
ENSMUSG00000024501	-0.467836	273.900937600802,0.119291430661453,-3.92178724119552	8.78946e-05	0.00594406	0	Dpysl3	dihydropyrimidinase-like 3 [Source:MGI Symbol;Acc:MGI:1349762]	protein_coding	ENSMUST00000025379,ENSMUST00000118043,ENSMUST00000118071,ENSMUST00000121805,ENSMUST00000124207,ENSMUST00000135547	-	chr18	43320979	43438286	41.81
ENSMUSG00000027712	-0.38099	655.862377810349,0.097161015306677,-3.92122297280092	8.81007e-05	0.00594406	0	Anxa5	annexin A5 [Source:MGI Symbol;Acc:MGI:106008]	protein_coding	ENSMUST00000029266,ENSMUST00000196097,ENSMUST00000199478	-	chr3	36448923	36475894	44.41
ENSMUSG00000027236	0.244482	1510.52871282852,0.0624942422470205,3.91207814946659	9.15053e-05	0.00614436	0	Eif3j1	eukaryotic translation initiation factor 3, subunit J1 [Source:MGI Symbol;Acc:MGI:1925905]	protein_coding	ENSMUST00000028668,ENSMUST00000142747	+	chr2	122028546	122056598	40.38
ENSMUSG00000033124	0.173041	2534.93517473576,0.0442512875637699,3.91041118327666	9.21391e-05	0.0061576	0	Atg9a	autophagy related 9A [Source:MGI Symbol;Acc:MGI:2138446]	protein_coding	ENSMUST00000040689,ENSMUST00000186744,ENSMUST00000187601,ENSMUST00000187785,ENSMUST00000188347,ENSMUST00000188430,ENSMUST00000189665,ENSMUST00000189702,ENSMUST00000189820	-	chr1	75180860	75192196	52.42
ENSMUSG00000000532	0.548902	814.149749081142,0.140412833012471,3.90919953975665	9.26025e-05	0.00615937	0	Acvr1b	activin A receptor, type 1B [Source:MGI Symbol;Acc:MGI:1338944]	protein_coding	ENSMUST00000000544	+	chr15	101174067	101213679	49.44
ENSMUSG00000007682	-0.891036	88.3077445572394,0.22825273666522,-3.90372397215401	9.47238e-05	0.00623731	-1	Dio2	deiodinase, iodothyronine, type II [Source:MGI Symbol;Acc:MGI:1338833]	protein_coding	ENSMUST00000082432	-	chr12	90724554	90738438	42.09
ENSMUSG00000036943	-0.604191	224.144202064612,0.154843285241227,-3.90195413992152	9.54192e-05	0.00623731	-1	Rab8b	RAB8B, member RAS oncogene family [Source:MGI Symbol;Acc:MGI:2442982]	protein_coding	ENSMUST00000041139	-	chr9	66843672	66919705	42.52
ENSMUSG00000028420	0.29717	1092.15509571494,0.0761608355461476,3.90187913125706	9.54488e-05	0.00623731	0	Tmem38b	transmembrane protein 38B [Source:MGI Symbol;Acc:MGI:1098718]	protein_coding	ENSMUST00000030127,ENSMUST00000144167,ENSMUST00000150803,ENSMUST00000151206	+	chr4	53826045	53862019	41.36
ENSMUSG00000022565	0.293088	9372.51497738644,0.0751192584659889,3.90163921187876	9.55435e-05	0.00623731	0	Plec	plectin [Source:MGI Symbol;Acc:MGI:1277961]	protein_coding	ENSMUST00000023226,ENSMUST00000054449,ENSMUST00000071869,ENSMUST00000072692,ENSMUST00000073418,ENSMUST00000074834,ENSMUST00000076442,ENSMUST00000080857,ENSMUST00000089610,ENSMUST00000165135,ENSMUST00000165210,ENSMUST00000165453,ENSMUST00000166428,ENSMUST00000167754,ENSMUST00000169108,ENSMUST00000169289,ENSMUST00000169438,ENSMUST00000169714,ENSMUST00000170728,ENSMUST00000170915,ENSMUST00000171562,…	-	chr15	76170974	76232574	55.43
ENSMUSG00000032243	-0.597405	168.592264684028,0.15317165997239,-3.90022982915259	9.61014e-05	0.00624482	-1	Itga11	integrin alpha 11 [Source:MGI Symbol;Acc:MGI:2442114]	protein_coding	ENSMUST00000034774,ENSMUST00000159012	+	chr9	62677826	62783982	49.98
ENSMUSG00000033788	0.27188	869.475724659823,0.0697629984649386,3.89719437315887	9.73135e-05	0.00629458	0	Dysf	dysferlin [Source:MGI Symbol;Acc:MGI:1349385]	protein_coding	ENSMUST00000081904,ENSMUST00000089595,ENSMUST00000113818,ENSMUST00000113821,ENSMUST00000113823,ENSMUST00000127459,ENSMUST00000128965,ENSMUST00000142711,ENSMUST00000152646,ENSMUST00000153860,ENSMUST00000168387,ENSMUST00000203695,ENSMUST00000203803,ENSMUST00000204354,ENSMUST00000204591,ENSMUST00000204987	+	chr6	84008590	84211060	48.88
ENSMUSG00000051367	0.21951	1860.97579322488,0.0564196448066595,3.89065770552599	9.99729e-05	0.00639765	0	Six1	sine oculis-related homeobox 1 [Source:MGI Symbol;Acc:MGI:102780]	protein_coding	ENSMUST00000050029,ENSMUST00000175677,ENSMUST00000176091,ENSMUST00000176310	-	chr12	73040015	73053887	50.04
ENSMUSG00000083327	0.459648	376.792690747291,0.118183216387077,3.88928403633455	0.00010054	0.00639765	0	Vcp-rs	valosin containing protein, related sequence [Source:MGI Symbol;Acc:MGI:894298]	processed_pseudogene	ENSMUST00000120233	-	chrX	104345829	104348234	48.46
ENSMUSG00000032116	-0.605506	552.657335515467,0.15569627570923,-3.88902358675231	0.000100648	0.00639765	-1	Stt3a	STT3, subunit of the oligosaccharyltransferase complex, homolog A (S. cerevisiae) [Source:MGI Symbol;Acc:MGI:105124]	protein_coding	ENSMUST00000120381,ENSMUST00000128270,ENSMUST00000133060,ENSMUST00000135934,ENSMUST00000137994,ENSMUST00000138358,ENSMUST00000143881	-	chr9	36729344	36767679	39.86
ENSMUSG00000019916	-0.244721	1200.23331484581,0.0629312441189157,-3.88870655564681	0.00010078	0.00639765	0	P4ha1	procollagen-proline, 2-oxoglutarate 4-dioxygenase (proline 4-hydroxylase), alpha 1 polypeptide [Source:MGI Symbol;Acc:MGI:97463]	protein_coding	ENSMUST00000009789,ENSMUST00000092512,ENSMUST00000105466	+	chr10	59323296	59373304	41.47
ENSMUSG00000036545	-0.551243	270.447933911588,0.141789430041494,-3.88775533668212	0.000101176	0.00639765	0	Adamts2	a disintegrin-like and metallopeptidase (reprolysin type) with thrombospondin type 1 motif, 2 [Source:MGI Symbol;Acc:MGI:1347356]	protein_coding	ENSMUST00000040523,ENSMUST00000125988,ENSMUST00000127534,ENSMUST00000142118	+	chr11	50602084	50807573	48.68
ENSMUSG00000091971	-0.849266	231.190087308381,0.218590120919778,-3.88520039905229	0.000102246	0.00643645	-1	Hspa1a	heat shock protein 1A [Source:MGI Symbol;Acc:MGI:96244]	protein_coding	ENSMUST00000087328	-	chr17	34969190	34972156	58.95
ENSMUSG00000020571	-0.537038	702.946324870505,0.138362462962073,-3.88138677297759	0.000103863	0.00649518	0	Pdia6	protein disulfide isomerase associated 6 [Source:MGI Symbol;Acc:MGI:1919103]	protein_coding	ENSMUST00000057288,ENSMUST00000159434,ENSMUST00000161853,ENSMUST00000162936,ENSMUST00000163000	+	chr12	17266545	17284770	45.33
ENSMUSG00000028841	0.389147	611.382900860146,0.100274209914474,3.88083199679782	0.0001041	0.00649518	0	Cnksr1	connector enhancer of kinase suppressor of Ras 1 [Source:MGI Symbol;Acc:MGI:2670958]	protein_coding	ENSMUST00000030645,ENSMUST00000124181,ENSMUST00000144504,ENSMUST00000145998,ENSMUST00000146283	-	chr4	134228041	134238399	52.85
ENSMUSG00000030104	-0.741243	210.484769006439,0.191185261396761,-3.87709432387574	0.000105711	0.00656668	-1	Edem1	ER degradation enhancer, mannosidase alpha-like 1 [Source:MGI Symbol;Acc:MGI:2180139]	protein_coding	ENSMUST00000089162,ENSMUST00000203302,ENSMUST00000203469,ENSMUST00000204524,ENSMUST00000204804	+	chr6	108828641	108859356	44.99
ENSMUSG00000001027	0.211299	7141.15892978309,0.0546969365862991,3.86308814108681	0.000111963	0.00690734	0	Scn4a	sodium channel, voltage-gated, type IV, alpha [Source:MGI Symbol;Acc:MGI:98250]	protein_coding	ENSMUST00000021056,ENSMUST00000174877	-	chr11	106318592	106353288	51.42
ENSMUSG00000021453	0.752433	517.169422105058,0.194798298918018,3.86262493633739	0.000112175	0.00690734	1	Gadd45g	growth arrest and DNA-damage-inducible 45 gamma [Source:MGI Symbol;Acc:MGI:1346325]	protein_coding	ENSMUST00000021903,ENSMUST00000132480	+	chr13	51846678	51848468	60.02
ENSMUSG00000026185	-0.387346	10748.3021252071,0.100367157978099,-3.85929433761206	0.000113715	0.00697171	0	Igfbp5	insulin-like growth factor binding protein 5 [Source:MGI Symbol;Acc:MGI:96440]	protein_coding	ENSMUST00000027377,ENSMUST00000137339	-	chr1	72857932	72874884	49.55
ENSMUSG00000068735	0.92023	55.588840774858,0.238771207672231,3.85402567693329	0.000116191	0.00709271	1	Trp53i11	transformation related protein 53 inducible protein 11 [Source:MGI Symbol;Acc:MGI:2670995]	protein_coding	ENSMUST00000090554,ENSMUST00000111266,ENSMUST00000127173,ENSMUST00000132182,ENSMUST00000140172,ENSMUST00000143164,ENSMUST00000147377,ENSMUST00000150462	+	chr2	93187548	93201759	56
ENSMUSG00000032554	-0.473051	913.444662290346,0.123074494076051,-3.8436186448559	0.000121233	0.00736858	0	Trf	transferrin [Source:MGI Symbol;Acc:MGI:98821]	protein_coding	ENSMUST00000035158,ENSMUST00000112503,ENSMUST00000112645,ENSMUST00000126359,ENSMUST00000164377,ENSMUST00000165296,ENSMUST00000168142,ENSMUST00000170904,ENSMUST00000190051	-	chr9	103204001	103230444	47.08
ENSMUSG00000073421	-0.610316	560.812309194746,0.15890652211426,-3.84072135704835	0.000122673	0.0074241	-1	H2-Ab1	histocompatibility 2, class II antigen A, beta 1 [Source:MGI Symbol;Acc:MGI:103070]	protein_coding	ENSMUST00000040828,ENSMUST00000173103,ENSMUST00000174875	+	chr17	34263209	34269418	52.25
ENSMUSG00000031310	0.514377	193.237790540045,0.134051977725182,3.83714546256959	0.000124473	0.00750081	0	Zmym3	zinc finger, MYM-type 3 [Source:MGI Symbol;Acc:MGI:1927231]	protein_coding	ENSMUST00000063577,ENSMUST00000117637,ENSMUST00000117901,ENSMUST00000118092,ENSMUST00000119699,ENSMUST00000120107,ENSMUST00000120201,ENSMUST00000121429,ENSMUST00000121520,ENSMUST00000129545,ENSMUST00000129561,ENSMUST00000129586,ENSMUST00000134005,ENSMUST00000137416,ENSMUST00000141895,ENSMUST00000143159,ENSMUST00000147017,ENSMUST00000155040	-	chrX	101404384	101420849	51.03
ENSMUSG00000038642	-0.581386	177.98248166164,0.151571534795819,-3.83571998091794	0.000125197	0.00751235	0	Ctss	cathepsin S [Source:MGI Symbol;Acc:MGI:107341]	protein_coding	ENSMUST00000015667,ENSMUST00000116304	+	chr3	95526786	95556403	44.37
ENSMUSG00000048126	-0.364057	1125.25868564636,0.094944749565444,-3.83440386980083	0.000125869	0.00752068	0	Col6a3	collagen, type VI, alpha 3 [Source:MGI Symbol;Acc:MGI:88461]	protein_coding	ENSMUST00000056925,ENSMUST00000097653,ENSMUST00000130846,ENSMUST00000136916,ENSMUST00000145750,ENSMUST00000150769,ENSMUST00000187753,ENSMUST00000188587	-	chr1	90765923	90843971	47.34
ENSMUSG00000052293	4.22432	9.20590411038772,1.10642694078436,3.8179869654261	0.000134545	0.00796933	1	Taf9	TAF9 RNA polymerase II, TATA box binding protein (TBP)-associated factor [Source:MGI Symbol;Acc:MGI:1888697]	protein_coding	ENSMUST00000167256,ENSMUST00000185767,ENSMUST00000187792,ENSMUST00000190165,ENSMUST00000190594	+	chr13	100651579	100656060	42.32
ENSMUSG00000028820	-0.323198	965.812949674376,0.0846827200587357,-3.81657689525978	0.000135316	0.00796933	0	Sfpq	splicing factor proline/glutamine rich (polypyrimidine tract binding protein associated) [Source:MGI Symbol;Acc:MGI:1918764]	protein_coding	ENSMUST00000030623,ENSMUST00000125453,ENSMUST00000140682,ENSMUST00000143168,ENSMUST00000144630,ENSMUST00000146285	+	chr4	127021324	127037013	41.15
ENSMUSG00000020257	-0.320999	491.338809298808,0.0841157521479911,-3.81615495683115	0.000135547	0.00796933	0	Wdr82	WD repeat domain containing 82 [Source:MGI Symbol;Acc:MGI:1924555]	protein_coding	ENSMUST00000020490,ENSMUST00000190564,ENSMUST00000191147	+	chr9	106170928	106191136	43.66
ENSMUSG00000032440	-0.432495	834.778276942092,0.113349009156016,-3.81560464248393	0.00013585	0.00796933	0	Tgfbr2	transforming growth factor, beta receptor II [Source:MGI Symbol;Acc:MGI:98729]	protein_coding	ENSMUST00000035014,ENSMUST00000061101	-	chr9	116087698	116175363	46.76
ENSMUSG00000035863	-0.523555	216.69631856399,0.137237245585247,-3.81496234279764	0.000136204	0.00796933	0	Palm	paralemmin [Source:MGI Symbol;Acc:MGI:1261814]	protein_coding	ENSMUST00000046945,ENSMUST00000105379	+	chr10	79793572	79820896	53.04
ENSMUSG00000027742	0.213203	1561.95847264936,0.0559193773672856,3.8126843247389	0.000137466	0.00800993	0	Cog6	component of oligomeric golgi complex 6 [Source:MGI Symbol;Acc:MGI:1914792]	protein_coding	ENSMUST00000036665,ENSMUST00000192788,ENSMUST00000193043,ENSMUST00000193432,ENSMUST00000194779,ENSMUST00000195183	-	chr3	52981875	53017237	43.65
ENSMUSG00000029201	-0.683269	241.597194158259,0.179336530013624,-3.80998351782865	0.000138976	0.00804138	-1	Ugdh	UDP-glucose dehydrogenase [Source:MGI Symbol;Acc:MGI:1306785]	protein_coding	ENSMUST00000031103,ENSMUST00000125375,ENSMUST00000131263,ENSMUST00000139402	-	chr5	65413221	65435949	44.19
ENSMUSG00000001506	-0.59001	1605.70273270439,0.154871271528551,-3.80968152250512	0.000139146	0.00804138	-1	Col1a1	collagen, type I, alpha 1 [Source:MGI Symbol;Acc:MGI:88467]	protein_coding	ENSMUST00000001547,ENSMUST00000139974,ENSMUST00000148046,ENSMUST00000148593	+	chr11	94936224	94953042	53.92
ENSMUSG00000001333	0.380126	391.320443191869,0.0998763483265348,3.8059695515816	0.00014125	0.00811849	0	Sync	syncoilin [Source:MGI Symbol;Acc:MGI:1916078]	protein_coding	ENSMUST00000102599,ENSMUST00000146448	+	chr4	129287617	129308559	47.2
ENSMUSG00000034675	-0.785607	109.221788640152,0.206500864871922,-3.80437802842566	0.000142161	0.00811849	-1	Dbn1	drebrin 1 [Source:MGI Symbol;Acc:MGI:1931838]	protein_coding	ENSMUST00000021950,ENSMUST00000109921,ENSMUST00000109923,ENSMUST00000124480,ENSMUST00000127867,ENSMUST00000135705,ENSMUST00000139275,ENSMUST00000139516,ENSMUST00000175813	-	chr13	55473429	55488111	55.36
ENSMUSG00000017929	-0.495745	182.531526870296,0.130311914523003,-3.80429692413202	0.000142208	0.00811849	0	B4galt5	UDP-Gal:betaGlcNAc beta 1,4-galactosyltransferase, polypeptide 5 [Source:MGI Symbol;Acc:MGI:1927169]	protein_coding	ENSMUST00000109221,ENSMUST00000133557,ENSMUST00000149698,ENSMUST00000155623	-	chr2	167298444	167349183	48.79
ENSMUSG00000049625	-2.41188	28.2860681637888,0.6348010162842,-3.79943036751992	0.000145029	0.00824619	-1	Tifab	TRAF-interacting protein with forkhead-associated domain, family member B [Source:MGI Symbol;Acc:MGI:2385852]	protein_coding	ENSMUST00000169652	-	chr13	56173703	56178885	51.13
ENSMUSG00000035992	-0.313063	2384.78036367116,0.0824863098371921,-3.79532976290483	0.000147447	0.00835002	0	Fnip1	folliculin interacting protein 1 [Source:MGI Symbol;Acc:MGI:2444668]	protein_coding	ENSMUST00000046835,ENSMUST00000143650	+	chr11	54438199	54518235	37.39
ENSMUSG00000015711	0.279454	1305.15380122622,0.0737658422490421,3.78839517168939	0.000151624	0.00855217	0	Prune	prune homolog (Drosophila) [Source:MGI Symbol;Acc:MGI:1925152]	protein_coding	ENSMUST00000015855,ENSMUST00000148959	-	chr3	95253674	95282076	46.98
ENSMUSG00000033416	0.374481	729.817612087027,0.0988960818142141,3.78661418074843	0.000152714	0.00857936	0	Gucd1	guanylyl cyclase domain containing 1 [Source:MGI Symbol;Acc:MGI:1916028]	protein_coding	ENSMUST00000039796,ENSMUST00000118936,ENSMUST00000123505,ENSMUST00000128419,ENSMUST00000129307,ENSMUST00000136763,ENSMUST00000138122,ENSMUST00000145890,ENSMUST00000147269,ENSMUST00000153125	-	chr10	75351111	75517972	45.16
ENSMUSG00000042613	0.179393	4739.75966772404,0.0475119535246877,3.7757533214052	0.000159525	0.00892643	0	Pbxip1	pre B cell leukemia transcription factor interacting protein 1 [Source:MGI Symbol;Acc:MGI:2441670]	protein_coding	ENSMUST00000038942,ENSMUST00000130858,ENSMUST00000141340,ENSMUST00000145753,ENSMUST00000146630	+	chr3	89436706	89450952	52.95
ENSMUSG00000029659	-0.441664	408.272712207834,0.117087030466658,-3.77209669897324	0.000161881	0.00902249	0	Medag	mesenteric estrogen dependent adipogenesis [Source:MGI Symbol;Acc:MGI:1917967]	protein_coding	ENSMUST00000093110,ENSMUST00000201083,ENSMUST00000201588	+	chr5	149411749	149431723	46.57
ENSMUSG00000023259	0.532957	142.574810382067,0.141414869708081,3.76874779045952	0.000164069	0.00910839	0	Slc26a6	solute carrier family 26, member 6 [Source:MGI Symbol;Acc:MGI:2159728]	protein_coding	ENSMUST00000098376,ENSMUST00000188557,ENSMUST00000191404,ENSMUST00000192507,ENSMUST00000192559,ENSMUST00000193291,ENSMUST00000193463,ENSMUST00000193825,ENSMUST00000193874,ENSMUST00000195646	+	chr9	108853283	108913049	54.26
ENSMUSG00000031618	0.467267	222.857679512829,0.124140573368944,3.76401916361193	0.000167204	0.00924606	0	Nr3c2	nuclear receptor subfamily 3, group C, member 2 [Source:MGI Symbol;Acc:MGI:99459]	protein_coding	ENSMUST00000034031,ENSMUST00000109911,ENSMUST00000109912,ENSMUST00000109913,ENSMUST00000126697,ENSMUST00000128862,ENSMUST00000143284,ENSMUST00000148106	+	chr8	76899442	77245012	41.62
ENSMUSG00000034160	0.197152	3026.6576085021,0.0524375678930027,3.75975490812038	0.00017008	0.00936835	0	Ogt	O-linked N-acetylglucosamine (GlcNAc) transferase (UDP-N-acetylglucosamine:polypeptide-N-acetylglucosaminyl transferase) [Source:MGI Symbol;Acc:MGI:1339639]	protein_coding	ENSMUST00000044475,ENSMUST00000119299,ENSMUST00000147635,ENSMUST00000150161,ENSMUST00000153979,ENSMUST00000155713,ENSMUST00000155792	+	chrX	101640060	101684351	40.49
ENSMUSG00000031004	-2.20653	45.2346187269627,0.587156610186081,-3.75799232183541	0.000171282	0.00939786	-1	Mki67	antigen identified by monoclonal antibody Ki 67 [Source:MGI Symbol;Acc:MGI:106035]	protein_coding	ENSMUST00000033310	-	chr7	135689788	135716379	43.17
ENSMUSG00000074063	-0.458534	188.726072928236,0.122078118255721,-3.75606940410715	0.000172603	0.00943362	0	Osgin1	oxidative stress induced growth inhibitor 1 [Source:MGI Symbol;Acc:MGI:1919089]	protein_coding	ENSMUST00000098365,ENSMUST00000126414,ENSMUST00000131448,ENSMUST00000144381,ENSMUST00000145604,ENSMUST00000152420	+	chr8	119434124	119446256	54.5
ENSMUSG00000015852	-0.597051	119.939022744067,0.159009066685667,-3.75482292712496	0.000173464	0.00944408	-1	Fcrls	Fc receptor-like S, scavenger receptor [Source:MGI Symbol;Acc:MGI:1933397]	protein_coding	ENSMUST00000090986,ENSMUST00000146512	-	chr3	87250758	87263738	44.53
ENSMUSG00000034205	-0.504884	328.032932631015,0.135129528075594,-3.73629855222546	0.000186749	0.0101283	0	Loxl2	lysyl oxidase-like 2 [Source:MGI Symbol;Acc:MGI:2137913]	protein_coding	ENSMUST00000022660,ENSMUST00000100420	+	chr14	69609068	69695834	47.07
ENSMUSG00000028159	-0.603759	212.939144340737,0.161665748997992,-3.73461448792754	0.000188003	0.0101572	-1	Dapp1	dual adaptor for phosphotyrosine and 3-phosphoinositides 1 [Source:MGI Symbol;Acc:MGI:1347063]	protein_coding	ENSMUST00000029806,ENSMUST00000124827,ENSMUST00000136613,ENSMUST00000154716,ENSMUST00000184222,ENSMUST00000199541,ENSMUST00000200596	-	chr3	137931007	137981545	44.14
ENSMUSG00000029718	-0.331268	564.893783735523,0.0887459600582385,-3.73276351148649	0.00018939	0.0101677	0	Pcolce	procollagen C-endopeptidase enhancer protein [Source:MGI Symbol;Acc:MGI:105099]	protein_coding	ENSMUST00000031731,ENSMUST00000054564,ENSMUST00000124693,ENSMUST00000128755,ENSMUST00000131703,ENSMUST00000136649,ENSMUST00000137210,ENSMUST00000142675,ENSMUST00000146589,ENSMUST00000148662,ENSMUST00000155251,ENSMUST00000197912	-	chr5	137605103	137613784	55.15
ENSMUSG00000074743	-0.564185	519.587999776598,0.151157514488609,-3.73243336967421	0.000189639	0.0101677	0	Thbd	thrombomodulin [Source:MGI Symbol;Acc:MGI:98736]	protein_coding	ENSMUST00000099270	-	chr2	148404466	148408188	51.36
ENSMUSG00000021614	-0.663969	184.926779221698,0.177960801586362,-3.73098613526571	0.000190732	0.0101875	-1	Vcan	versican [Source:MGI Symbol;Acc:MGI:102889]	protein_coding	ENSMUST00000109543,ENSMUST00000109544,ENSMUST00000109546,ENSMUST00000159285,ENSMUST00000159337,ENSMUST00000159910,ENSMUST00000160029,ENSMUST00000160740,ENSMUST00000162715	-	chr13	89655312	89742509	38.53
ENSMUSG00000028977	0.428636	598.207084083313,0.11498763278246,3.72767228523574	0.000193256	0.0102834	0	Casz1	castor zinc finger 1 [Source:MGI Symbol;Acc:MGI:1196251]	protein_coding	ENSMUST00000094464,ENSMUST00000122222,ENSMUST00000128881,ENSMUST00000139806,ENSMUST00000140617,ENSMUST00000147270	+	chr4	148804429	148954889	52.99
ENSMUSG00000022995	-0.529401	918.068003391267,0.142179703785144,-3.72346301247433	0.000196509	0.0103698	0	Enah	enabled homolog (Drosophila) [Source:MGI Symbol;Acc:MGI:108360]	protein_coding	ENSMUST00000078719,ENSMUST00000111024,ENSMUST00000111025,ENSMUST00000111030,ENSMUST00000177811,ENSMUST00000191649,ENSMUST00000192497,ENSMUST00000192768,ENSMUST00000192967,ENSMUST00000193074,ENSMUST00000193703,ENSMUST00000195059,ENSMUST00000195461,ENSMUST00000195703,ENSMUST00000195788,ENSMUST00000195840	-	chr1	181896384	182019990	40.12
ENSMUSG00000038520	0.325942	461.623128053704,0.0875459298884329,3.72309652559829	0.000196794	0.0103698	0	Tbc1d17	TBC1 domain family, member 17 [Source:MGI Symbol;Acc:MGI:2449973]	protein_coding	ENSMUST00000047085,ENSMUST00000130081,ENSMUST00000133846,ENSMUST00000139947,ENSMUST00000142098,ENSMUST00000145959,ENSMUST00000149921,ENSMUST00000153161,ENSMUST00000207293,ENSMUST00000207532,ENSMUST00000208714,ENSMUST00000208890	-	chr7	44834623	44849079	55.13
ENSMUSG00000005103	-0.326829	883.784567659857,0.0877930953453313,-3.72272229349698	0.000197086	0.0103698	0	Wdr1	WD repeat domain 1 [Source:MGI Symbol;Acc:MGI:1337100]	protein_coding	ENSMUST00000005234,ENSMUST00000200909,ENSMUST00000201059,ENSMUST00000201150,ENSMUST00000201260,ENSMUST00000201330,ENSMUST00000201456,ENSMUST00000201538,ENSMUST00000202199,ENSMUST00000202496,ENSMUST00000202766	-	chr5	38526813	38563221	49.74
ENSMUSG00000026208	0.246335	29867.9719791444,0.066207096631223,3.72067461256658	0.000198691	0.0104154	0	Des	desmin [Source:MGI Symbol;Acc:MGI:94885]	protein_coding	ENSMUST00000027409,ENSMUST00000125948,ENSMUST00000144894	+	chr1	75360329	75368579	52.59
ENSMUSG00000034295	0.36003	1119.00556489931,0.0969049904716178,3.71529303747899	0.000202968	0.0105532	0	Fhod3	formin homology 2 domain containing 3 [Source:MGI Symbol;Acc:MGI:1925847]	protein_coding	ENSMUST00000037097	+	chr18	24709445	25133500	44.32
ENSMUSG00000029361	0.328439	1930.34440598962,0.0884133787565341,3.71480941379028	0.000203357	0.0105532	0	Nos1	nitric oxide synthase 1, neuronal [Source:MGI Symbol;Acc:MGI:97360]	protein_coding	ENSMUST00000086451,ENSMUST00000102557,ENSMUST00000124194,ENSMUST00000138554,ENSMUST00000138579,ENSMUST00000142742,ENSMUST00000171055	+	chr5	117781032	117958840	49.24
ENSMUSG00000049106	0.316832	772.469702293515,0.0852949219081031,3.71455173278758	0.000203564	0.0105532	0	Dcaf5	DDB1 and CUL4 associated factor 5 [Source:MGI Symbol;Acc:MGI:2444785]	protein_coding	ENSMUST00000054145	-	chr12	80335847	80436601	43.78
ENSMUSG00000023067	0.565831	309.220622586374,0.152412562867301,3.71249254915395	0.000205228	0.0106004	0	Cdkn1a	cyclin-dependent kinase inhibitor 1A (P21) [Source:MGI Symbol;Acc:MGI:104556]	protein_coding	ENSMUST00000023829,ENSMUST00000119901,ENSMUST00000122348	+	chr17	29090979	29100722	53.89
ENSMUSG00000020439	0.31566	786.638628909475,0.0850905800396693,3.70969735600096	0.000207507	0.010679	0	Smtn	smoothelin [Source:MGI Symbol;Acc:MGI:1354727]	protein_coding	ENSMUST00000020718,ENSMUST00000020721,ENSMUST00000075118,ENSMUST00000110011,ENSMUST00000136243,ENSMUST00000144635,ENSMUST00000151804,ENSMUST00000154861,ENSMUST00000156201,ENSMUST00000170588	-	chr11	3517523	3540612	54.34
ENSMUSG00000028339	-0.29716	689.094678634452,0.0802974373344092,-3.7007359736553	0.000214975	0.0110231	0	Col15a1	collagen, type XV, alpha 1 [Source:MGI Symbol;Acc:MGI:88449]	protein_coding	ENSMUST00000082303,ENSMUST00000102917,ENSMUST00000107730,ENSMUST00000107731,ENSMUST00000124105,ENSMUST00000140094,ENSMUST00000140413,ENSMUST00000146967,ENSMUST00000148103	+	chr4	47208161	47313167	48.55
ENSMUSG00000026207	0.254042	4071.47666855959,0.0686761516198229,3.69912828302368	0.000216341	0.011053	0	Speg	SPEG complex locus [Source:MGI Symbol;Acc:MGI:109282]	protein_coding	ENSMUST00000087122,ENSMUST00000113587,ENSMUST00000113588,ENSMUST00000113589,ENSMUST00000113590,ENSMUST00000122266,ENSMUST00000125118,ENSMUST00000125306,ENSMUST00000132222,ENSMUST00000132228,ENSMUST00000137868,ENSMUST00000143679,ENSMUST00000146705,ENSMUST00000148515,ENSMUST00000187214	+	chr1	75375297	75432320	53.54
ENSMUSG00000023277	0.315818	1716.74672462212,0.0854086434359859,3.69772953249319	0.000217536	0.0110739	0	Twf2	twinfilin, actin-binding protein, homolog 2 (Drosophila) [Source:MGI Symbol;Acc:MGI:1346078]	protein_coding	ENSMUST00000024047,ENSMUST00000187647,ENSMUST00000187944,ENSMUST00000188650,ENSMUST00000189708	+	chr9	106203108	106215389	52.18
ENSMUSG00000025986	-0.603826	211.545653466743,0.163414747596775,-3.69505117164023	0.000219843	0.0111511	-1	Slc39a10	solute carrier family 39 (zinc transporter), member 10 [Source:MGI Symbol;Acc:MGI:1914515]	protein_coding	ENSMUST00000027131,ENSMUST00000141226,ENSMUST00000185520,ENSMUST00000186852	-	chr1	46807544	46892852	39.19
ENSMUSG00000046768	-0.49258	308.208283407789,0.133472794697612,-3.69049117534815	0.000223821	0.0113122	0	Rhoj	ras homolog gene family, member J [Source:MGI Symbol;Acc:MGI:1931551]	protein_coding	ENSMUST00000055390,ENSMUST00000118602,ENSMUST00000118966,ENSMUST00000146096,ENSMUST00000172981	+	chr12	75308322	75401456	43.55
ENSMUSG00000040653	0.334465	1671.80334198518,0.0908567027035964,3.68123290085141	0.000232109	0.0116892	0	Ppp1r14c	protein phosphatase 1, regulatory (inhibitor) subunit 14c [Source:MGI Symbol;Acc:MGI:1923392]	protein_coding	ENSMUST00000043374	+	chr10	3366150	3464975	43.02
ENSMUSG00000027303	-0.462259	318.587463851269,0.125638724390711,-3.67927467362512	0.000233898	0.0117374	0	Ptpra	protein tyrosine phosphatase, receptor type, A [Source:MGI Symbol;Acc:MGI:97808]	protein_coding	ENSMUST00000028769,ENSMUST00000077303	+	chr2	130450278	130554026	43.51
ENSMUSG00000032359	-0.54483	173.946026606455,0.1481225178263,-3.67823814510013	0.000234851	0.0117424	0	Ctsh	cathepsin H [Source:MGI Symbol;Acc:MGI:107285]	protein_coding	ENSMUST00000034915,ENSMUST00000123320,ENSMUST00000127842,ENSMUST00000132718,ENSMUST00000142750,ENSMUST00000143172,ENSMUST00000151219,ENSMUST00000185459,ENSMUST00000186126,ENSMUST00000187437,ENSMUST00000190338	+	chr9	90054152	90076089	47.74
ENSMUSG00000032578	-2.2661	280.30771910228,0.616278118073928,-3.67707385710315	0.000235925	0.0117424	-1	Cish	cytokine inducible SH2-containing protein [Source:MGI Symbol;Acc:MGI:103159]	protein_coding	ENSMUST00000085102,ENSMUST00000165664,ENSMUST00000167072,ENSMUST00000168260,ENSMUST00000171568	+	chr9	107296026	107302784	52.61
ENSMUSG00000075307	0.248405	8645.53658935992,0.0675664992914664,3.67645503881836	0.000236498	0.0117424	0	Klhl41	kelch-like 41 [Source:MGI Symbol;Acc:MGI:2683854]	protein_coding	ENSMUST00000100050	+	chr2	69670120	69684230	42.46
ENSMUSG00000021373	0.221703	4112.54448254063,0.0603198360301061,3.67546235940554	0.000237419	0.0117468	0	Cap2	CAP, adenylate cyclase-associated protein, 2 (yeast) [Source:MGI Symbol;Acc:MGI:1914502]	protein_coding	ENSMUST00000021802,ENSMUST00000119341,ENSMUST00000126687	+	chr13	46501848	46649642	44.87
ENSMUSG00000032332	-0.698824	190.366857124527,0.190201644699345,-3.67412287665835	0.000238668	0.0117673	-1	Col12a1	collagen, type XII, alpha 1 [Source:MGI Symbol;Acc:MGI:88448]	protein_coding	ENSMUST00000071750,ENSMUST00000121227,ENSMUST00000122827,ENSMUST00000135009,ENSMUST00000141667,ENSMUST00000150289	-	chr9	79598991	79718831	39.5
ENSMUSG00000038670	0.27786	60704.0912515306,0.0759297275283143,3.65943151275997	0.000252775	0.0124195	0	Mybpc2	myosin binding protein C, fast-type [Source:MGI Symbol;Acc:MGI:1336170]	protein_coding	ENSMUST00000165208,ENSMUST00000207516	-	chr7	44501699	44524656	51.91
ENSMUSG00000027195	-0.685821	190.012165392555,0.187687448279737,-3.65405886372484	0.000258127	0.0126384	-1	Hsd17b12	hydroxysteroid (17-beta) dehydrogenase 12 [Source:MGI Symbol;Acc:MGI:1926967]	protein_coding	ENSMUST00000028619,ENSMUST00000127084,ENSMUST00000141955,ENSMUST00000145967,ENSMUST00000146580	-	chr2	94032689	94157964	40.67
ENSMUSG00000029817	-0.369621	504.924226297035,0.101387376876004,-3.64563194895913	0.000266736	0.0130147	0	Tra2a	transformer 2 alpha homolog (Drosophila) [Source:MGI Symbol;Acc:MGI:1933972]	protein_coding	ENSMUST00000031841,ENSMUST00000203820,ENSMUST00000204013,ENSMUST00000204189,ENSMUST00000204818	-	chr6	49243924	49264033	40.43
ENSMUSG00000038388	0.250609	1074.71602509914,0.068877711885942,3.63846211677492	0.000274271	0.0133326	0	Mpp6	membrane protein, palmitoylated 6 (MAGUK p55 subfamily member 6) [Source:MGI Symbol;Acc:MGI:1927340]	protein_coding	ENSMUST00000036225,ENSMUST00000036236,ENSMUST00000166318,ENSMUST00000167063,ENSMUST00000167319,ENSMUST00000167628,ENSMUST00000171601,ENSMUST00000203415,ENSMUST00000204545	+	chr6	50110241	50198939	39.59
ENSMUSG00000021929	0.138083	4179.5649860148,0.0379595755429464,3.63764399320898	0.000275143	0.0133326	0	Kpna3	karyopherin (importin) alpha 3 [Source:MGI Symbol;Acc:MGI:1100863]	protein_coding	ENSMUST00000022496	-	chr14	61365186	61439947	38.93
ENSMUSG00000039041	0.246047	828.582941818966,0.0676720439493224,3.63588000155888	0.000277033	0.0133782	0	Adrm1	adhesion regulating molecule 1 [Source:MGI Symbol;Acc:MGI:1929289]	protein_coding	ENSMUST00000061437,ENSMUST00000128029,ENSMUST00000145230,ENSMUST00000147341,ENSMUST00000147383,ENSMUST00000152540,ENSMUST00000152850,ENSMUST00000155357	+	chr2	180171485	180176286	57.89
ENSMUSG00000045534	0.627177	88.9882151643882,0.172882119291848,3.6277721992892	0.000285877	0.0137582	1	Kcna5	potassium voltage-gated channel, shaker-related subfamily, member 5 [Source:MGI Symbol;Acc:MGI:96662]	protein_coding	ENSMUST00000060972	-	chr6	126532551	126535412	54.33
ENSMUSG00000024236	0.239976	4361.48580431087,0.0661714570926027,3.62657157378794	0.000287209	0.0137753	0	Svil	supervillin [Source:MGI Symbol;Acc:MGI:2147319]	protein_coding	ENSMUST00000025079,ENSMUST00000125512,ENSMUST00000126977,ENSMUST00000127297,ENSMUST00000129543,ENSMUST00000131210,ENSMUST00000131609,ENSMUST00000138258,ENSMUST00000139761,ENSMUST00000140448,ENSMUST00000143254,ENSMUST00000146723,ENSMUST00000148564,ENSMUST00000153016	+	chr18	4920540	5119299	45.35
ENSMUSG00000006360	-0.459213	354.376535077402,0.126686445557208,-3.62480369934745	0.000289181	0.0138229	0	Crip1	cysteine-rich protein 1 (intestinal) [Source:MGI Symbol;Acc:MGI:88501]	protein_coding	ENSMUST00000006523,ENSMUST00000196932,ENSMUST00000198597,ENSMUST00000198909,ENSMUST00000199089,ENSMUST00000200553	+	chr12	113146316	113153879	55
ENSMUSG00000028278	0.245986	4471.81203368568,0.0679308213920055,3.62112351893534	0.000293326	0.0139736	0	Rragd	Ras-related GTP binding D [Source:MGI Symbol;Acc:MGI:1098604]	protein_coding	ENSMUST00000029946,ENSMUST00000084747,ENSMUST00000098190,ENSMUST00000136792	+	chr4	32983037	33022180	44.76
ENSMUSG00000040479	0.291724	807.271830964919,0.0805976089452385,3.61951007445081	0.000295161	0.0140137	0	Dgkz	diacylglycerol kinase zeta [Source:MGI Symbol;Acc:MGI:1278339]	protein_coding	ENSMUST00000028667,ENSMUST00000099709,ENSMUST00000111303,ENSMUST00000124427,ENSMUST00000126473,ENSMUST00000128152,ENSMUST00000128902,ENSMUST00000130023,ENSMUST00000134103,ENSMUST00000138894,ENSMUST00000142090,ENSMUST00000142231,ENSMUST00000148297	-	chr2	91932824	91975864	53.22
ENSMUSG00000059791	-1.57765	19.1135664516079,0.436111525642937,-3.61754799446632	0.000297407	0.0140729	-1	Nrm	nurim (nuclear envelope membrane protein) [Source:MGI Symbol;Acc:MGI:2146855]	protein_coding	ENSMUST00000074259,ENSMUST00000172931,ENSMUST00000174873	+	chr17	35861318	35865402	51.24
ENSMUSG00000006398	-2.9886	14.8829907605096,0.826686782232331,-3.615155409275	0.000300167	0.0141561	-1	Cdc20	cell division cycle 20 [Source:MGI Symbol;Acc:MGI:1859866]	protein_coding	ENSMUST00000006565,ENSMUST00000151302,ENSMUST00000183942	-	chr4	118432901	118437352	50.97
ENSMUSG00000024965	-2.0199	54.6669386923635,0.559725866308961,-3.60873486180283	0.000307694	0.0144626	-1	Fermt3	fermitin family member 3 [Source:MGI Symbol;Acc:MGI:2147790]	protein_coding	ENSMUST00000040772	-	chr19	6998958	7019469	49.77
ENSMUSG00000031438	0.267589	794.953793382358,0.0742248224600036,3.6051117860642	0.000312019	0.0146172	0	Rnf128	ring finger protein 128 [Source:MGI Symbol;Acc:MGI:1914139]	protein_coding	ENSMUST00000113026,ENSMUST00000113027,ENSMUST00000113029	+	chrX	139563316	139673145	38.91
ENSMUSG00000063870	0.235429	1396.27016891015,0.0653270801012998,3.60385350403724	0.000313534	0.0146395	0	Chd4	chromodomain helicase DNA binding protein 4 [Source:MGI Symbol;Acc:MGI:1344380]	protein_coding	ENSMUST00000056889,ENSMUST00000112390,ENSMUST00000112392,ENSMUST00000124317,ENSMUST00000132794,ENSMUST00000138968,ENSMUST00000155261,ENSMUST00000155932	+	chr6	125095981	125130591	48.58
ENSMUSG00000095115	-0.459979	302.286483061187,0.127804958825521,-3.59906892729078	0.000319359	0.0148623	0	Itpripl2	inositol 1,4,5-triphosphate receptor interacting protein-like 2 [Source:MGI Symbol;Acc:MGI:2442416]	protein_coding	ENSMUST00000178344	-	chr7	118485111	118491975	50.6
ENSMUSG00000045776	-0.316032	967.233766712258,0.087882382040253,-3.59608063683548	0.000323048	0.0149454	0	Lrtm1	leucine-rich repeats and transmembrane domains 1 [Source:MGI Symbol;Acc:MGI:2442106]	protein_coding	ENSMUST00000055662	+	chr14	29018208	29033642	44.39
ENSMUSG00000030284	0.306433	450.540158482431,0.0852171607305392,3.59590646974281	0.000323264	0.0149454	0	Creld1	cysteine-rich with EGF-like domains 1 [Source:MGI Symbol;Acc:MGI:2152539]	protein_coding	ENSMUST00000032422,ENSMUST00000129125,ENSMUST00000135852,ENSMUST00000147932,ENSMUST00000156764,ENSMUST00000204920	+	chr6	113483297	113493343	51.37
ENSMUSG00000028033	0.389472	473.769497468862,0.108361593500115,3.59418684839122	0.000325406	0.0149953	0	Kcnq5	potassium voltage-gated channel, subfamily Q, member 5 [Source:MGI Symbol;Acc:MGI:1924937]	protein_coding	ENSMUST00000029667,ENSMUST00000115299,ENSMUST00000115300,ENSMUST00000134505,ENSMUST00000173058,ENSMUST00000173404,ENSMUST00000174183	-	chr1	21398403	21961942	38.64
ENSMUSG00000026979	-2.44742	21.8964512947195,0.681881392496658,-3.58921090395899	0.00033168	0.0152263	-1	Psd4	pleckstrin and Sec7 domain containing 4 [Source:MGI Symbol;Acc:MGI:2674093]	protein_coding	ENSMUST00000056641,ENSMUST00000102942,ENSMUST00000127242,ENSMUST00000131930,ENSMUST00000132924,ENSMUST00000133730,ENSMUST00000140303,ENSMUST00000140547,ENSMUST00000142522,ENSMUST00000166388	+	chr2	24367580	24414954	46.84
ENSMUSG00000043415	-0.79086	484.197631192886,0.220386950166823,-3.58850494088686	0.00033258	0.0152263	-1	Otud1	OTU domain containing 1 [Source:MGI Symbol;Acc:MGI:1918448]	protein_coding	ENSMUST00000052168	+	chr2	19657752	19660583	55.16
ENSMUSG00000032802	-0.376196	506.091021971159,0.105076715736956,-3.58020261296964	0.000343328	0.0156675	0	Srxn1	sulfiredoxin 1 homolog (S. cerevisiae) [Source:MGI Symbol;Acc:MGI:104971]	protein_coding	ENSMUST00000041500,ENSMUST00000128882,ENSMUST00000137751	+	chr2	152105516	152111376	51.77
ENSMUSG00000033544	-0.517883	290.205491160242,0.144745093526076,-3.57789851972625	0.000346368	0.0157108	0	Angptl1	angiopoietin-like 1 [Source:MGI Symbol;Acc:MGI:1919963]	protein_coding	ENSMUST00000027885,ENSMUST00000111720	+	chr1	156838562	156861078	40.58
ENSMUSG00000012428	-0.389148	550.433217651351,0.108767418032618,-3.57779511477469	0.000346505	0.0157108	0	Steap4	STEAP family member 4 [Source:MGI Symbol;Acc:MGI:1923560]	protein_coding	ENSMUST00000115421	+	chr5	7960457	7982213	40.35
ENSMUSG00000028413	-0.254143	794.745699379254,0.0710557957970389,-3.57666933467426	0.000348	0.01572	0	B4galt1	UDP-Gal:betaGlcNAc beta 1,4- galactosyltransferase, polypeptide 1 [Source:MGI Symbol;Acc:MGI:95705]	protein_coding	ENSMUST00000030121,ENSMUST00000108096	-	chr4	40804602	40854005	46.61
ENSMUSG00000025823	-0.764054	326.727951471919,0.213663580467786,-3.57596647699012	0.000348936	0.01572	-1	Pdia4	protein disulfide isomerase associated 4 [Source:MGI Symbol;Acc:MGI:104864]	protein_coding	ENSMUST00000077290,ENSMUST00000204029	-	chr6	47796141	47813430	45.63
ENSMUSG00000066036	0.284006	2115.93848377711,0.0796492402168775,3.56570851370061	0.000362875	0.0162958	0	Ubr4	ubiquitin protein ligase E3 component n-recognin 4 [Source:MGI Symbol;Acc:MGI:1916366]	protein_coding	ENSMUST00000097822,ENSMUST00000129779,ENSMUST00000129949,ENSMUST00000133220,ENSMUST00000135534,ENSMUST00000136230,ENSMUST00000141327,ENSMUST00000145273,ENSMUST00000145659,ENSMUST00000147999,ENSMUST00000149995,ENSMUST00000165860	+	chr4	139352609	139489588	49.26
ENSMUSG00000033083	0.482749	1425.5031454239,0.135437098562516,3.56437738311949	0.000364721	0.0163036	0	Tbc1d4	TBC1 domain family, member 4 [Source:MGI Symbol;Acc:MGI:2429660]	protein_coding	ENSMUST00000100340,ENSMUST00000159484,ENSMUST00000159664,ENSMUST00000159668,ENSMUST00000159951,ENSMUST00000160297,ENSMUST00000160473,ENSMUST00000161304,ENSMUST00000161991,ENSMUST00000162617	-	chr14	101442360	101609191	42.69
ENSMUSG00000014778	0.262615	598.905621223671,0.0736872610763053,3.56391797175127	0.00036536	0.0163036	0	Fhod1	formin homology 2 domain containing 1 [Source:MGI Symbol;Acc:MGI:2679008]	protein_coding	ENSMUST00000014922,ENSMUST00000132777,ENSMUST00000134837,ENSMUST00000136439	-	chr8	105329163	105347953	52.73
ENSMUSG00000029270	0.302516	501.485151443001,0.085060071238023,3.55649250508712	0.000375839	0.0167088	0	Fam69a	family with sequence similarity 69, member A [Source:MGI Symbol;Acc:MGI:1914516]	protein_coding	ENSMUST00000031198,ENSMUST00000145239,ENSMUST00000153172	-	chr5	107908053	107987085	42.04
ENSMUSG00000032177	0.312422	807.152748808099,0.0878767701861198,3.55522881613628	0.00037765	0.0167088	0	Pde4a	phosphodiesterase 4A, cAMP specific [Source:MGI Symbol;Acc:MGI:99558]	protein_coding	ENSMUST00000003395,ENSMUST00000039413,ENSMUST00000115458,ENSMUST00000127821,ENSMUST00000131769,ENSMUST00000140440	+	chr9	21165714	21213248	50.8
ENSMUSG00000016831	0.222182	1143.39071655322,0.0624986383088886,3.55498939379986	0.000377994	0.0167088	0	Tox4	TOX high mobility group box family member 4 [Source:MGI Symbol;Acc:MGI:1915389]	protein_coding	ENSMUST00000022766,ENSMUST00000137753,ENSMUST00000152493,ENSMUST00000172655,ENSMUST00000173361	+	chr14	52279146	52296391	43.37
ENSMUSG00000079020	0.32667	370.428380573136,0.0919178481517366,3.55392905348066	0.000379522	0.0167239	0	Slc45a4	solute carrier family 45, member 4 [Source:MGI Symbol;Acc:MGI:2146236]	protein_coding	ENSMUST00000054266,ENSMUST00000076224,ENSMUST00000130765,ENSMUST00000132607,ENSMUST00000144936,ENSMUST00000150409,ENSMUST00000151288,ENSMUST00000152558	-	chr15	73577424	73645762	49.81
ENSMUSG00000069515	-0.927881	103.093411658084,0.261606594239189,-3.54685743383958	0.000389855	0.0171257	-1	Lyz1	lysozyme 1 [Source:MGI Symbol;Acc:MGI:96902]	protein_coding	ENSMUST00000092162	-	chr10	117287796	117292868	46.09
ENSMUSG00000027177	0.178242	6740.59942110321,0.0503007416200635,3.54352149804748	0.000394821	0.0171796	0	Hipk3	homeodomain interacting protein kinase 3 [Source:MGI Symbol;Acc:MGI:1314882]	protein_coding	ENSMUST00000028600,ENSMUST00000111124,ENSMUST00000111125,ENSMUST00000132622	-	chr2	104426481	104494446	40.52
ENSMUSG00000040212	-0.718765	124.634770171489,0.202891247132491,-3.54261027702356	0.000396188	0.0171796	-1	Emp3	epithelial membrane protein 3 [Source:MGI Symbol;Acc:MGI:1098729]	protein_coding	ENSMUST00000038876,ENSMUST00000164119	-	chr7	45918023	45921426	54.55
ENSMUSG00000029373	-0.570719	113.529398950575,0.161129589371077,-3.54198511623668	0.000397128	0.0171796	0	Pf4	platelet factor 4 [Source:MGI Symbol;Acc:MGI:1888711]	protein_coding	ENSMUST00000031320,ENSMUST00000201990,ENSMUST00000202625	+	chr5	90772435	90773383	51.95
ENSMUSG00000027864	-0.511558	384.143648411851,0.14443067615406,-3.54189141762508	0.000397269	0.0171796	0	Ptgfrn	prostaglandin F2 receptor negative regulator [Source:MGI Symbol;Acc:MGI:1277114]	protein_coding	ENSMUST00000102694,ENSMUST00000198037,ENSMUST00000200065	-	chr3	101040232	101110278	47.61
ENSMUSG00000018167	0.456818	173.298208484959,0.128986387772876,3.54159696361794	0.000397713	0.0171796	0	Stard3	START domain containing 3 [Source:MGI Symbol;Acc:MGI:1929618]	protein_coding	ENSMUST00000018311,ENSMUST00000130323,ENSMUST00000143243,ENSMUST00000148738,ENSMUST00000152559,ENSMUST00000154960,ENSMUST00000155063	+	chr11	98358368	98381112	52.84
ENSMUSG00000029484	-0.674836	365.701358304197,0.190570061430751,-3.54114593528039	0.000398393	0.0171796	-1	Anxa3	annexin A3 [Source:MGI Symbol;Acc:MGI:1201378]	protein_coding	ENSMUST00000031447,ENSMUST00000196126,ENSMUST00000197196,ENSMUST00000197339,ENSMUST00000198631,ENSMUST00000199330,ENSMUST00000199390,ENSMUST00000199656,ENSMUST00000200379	+	chr5	96793339	96845966	43.4
ENSMUSG00000032479	0.239907	8489.6658073161,0.0679026625821956,3.53309480185772	0.000410725	0.0176574	0	Map4	microtubule-associated protein 4 [Source:MGI Symbol;Acc:MGI:97178]	protein_coding	ENSMUST00000035055,ENSMUST00000163190,ENSMUST00000163979,ENSMUST00000164930,ENSMUST00000165876,ENSMUST00000169851,ENSMUST00000196729,ENSMUST00000196763,ENSMUST00000197289,ENSMUST00000198185,ENSMUST00000198511,ENSMUST00000199161,ENSMUST00000199461,ENSMUST00000199498,ENSMUST00000199548,ENSMUST00000199985,ENSMUST00000200480	+	chr9	109931460	110083955	41.82
ENSMUSG00000024735	0.205924	2737.26019404716,0.0583723365335405,3.5277615877327	0.000419089	0.0179622	0	Prpf19	PRP19/PSO4 pre-mRNA processing factor 19 homolog (S. cerevisiae) [Source:MGI Symbol;Acc:MGI:106247]	protein_coding	ENSMUST00000025642,ENSMUST00000178868,ENSMUST00000179297,ENSMUST00000186416,ENSMUST00000187751,ENSMUST00000190275,ENSMUST00000191092,ENSMUST00000191552	+	chr19	10895231	10909559	49.02
ENSMUSG00000040715	0.738625	193.794277443322,0.209432259655866,3.52679487112836	0.000420623	0.0179733	1	Rsc1a1	regulatory solute carrier protein, family 1, member 1 [Source:MGI Symbol;Acc:MGI:3526447]	protein_coding	ENSMUST00000105782	-	chr4	141683851	141685599	51.34
ENSMUSG00000039005	-0.67022	161.874466587753,0.190136902732681,-3.52493260570682	0.000423591	0.0180164	-1	Tlr4	toll-like receptor 4 [Source:MGI Symbol;Acc:MGI:96824]	protein_coding	ENSMUST00000048096,ENSMUST00000107365,ENSMUST00000143580,ENSMUST00000147008	+	chr4	66827584	66930284	39.76
ENSMUSG00000063576	0.289228	845.361377223216,0.0820606840312528,3.52456070044026	0.000424186	0.0180164	0	Klhdc3	kelch domain containing 3 [Source:MGI Symbol;Acc:MGI:2651568]	protein_coding	ENSMUST00000071841,ENSMUST00000165007	-	chr17	46674550	46680930	53.41
ENSMUSG00000020836	0.265868	2242.09595060948,0.0755358405629387,3.51976471198266	0.00043193	0.0182902	0	Coro6	coronin 6 [Source:MGI Symbol;Acc:MGI:2183448]	protein_coding	ENSMUST00000021190,ENSMUST00000052515,ENSMUST00000079770,ENSMUST00000102493,ENSMUST00000108391,ENSMUST00000130255	+	chr11	77462411	77470484	55.9
ENSMUSG00000021222	0.40166	252.463178390026,0.11416905469021,3.51811969294726	0.000434616	0.0183489	0	Dcaf4	DDB1 and CUL4 associated factor 4 [Source:MGI Symbol;Acc:MGI:1921078]	protein_coding	ENSMUST00000021645	+	chr12	83520466	83541988	49.27
ENSMUSG00000028995	-0.441451	222.260776054501,0.125619307889905,-3.51419765960773	0.000441084	0.0185233	0	Fam126a	family with sequence similarity 126, member A [Source:MGI Symbol;Acc:MGI:2149839]	protein_coding	ENSMUST00000030849,ENSMUST00000101513,ENSMUST00000115109,ENSMUST00000126828,ENSMUST00000147179,ENSMUST00000197617,ENSMUST00000198867	-	chr5	23915276	24030690	41.42
ENSMUSG00000023800	-0.732413	111.824924129542,0.208427674520858,-3.5139895132791	0.00044143	0.0185233	-1	Tiam2	T cell lymphoma invasion and metastasis 2 [Source:MGI Symbol;Acc:MGI:1344338]	protein_coding	ENSMUST00000072156,ENSMUST00000169838	+	chr17	3326573	3519397	44.7
ENSMUSG00000026012	-0.647602	91.821866929527,0.184332290504594,-3.51323341161201	0.000442688	0.0185233	-1	Cd28	CD28 antigen [Source:MGI Symbol;Acc:MGI:88327]	protein_coding	ENSMUST00000027165,ENSMUST00000132833,ENSMUST00000153207	+	chr1	60716800	60773359	41.16
ENSMUSG00000024134	0.85602	69.4773370677213,0.243800895784887,3.5111434310617	0.000446184	0.0185664	1	Six2	sine oculis-related homeobox 2 [Source:MGI Symbol;Acc:MGI:102778]	protein_coding	ENSMUST00000024947,ENSMUST00000163568	-	chr17	85684277	85688274	57.38
ENSMUSG00000027339	-0.485902	175.671184343915,0.138392456000813,-3.51104277982015	0.000446353	0.0185664	0	Rassf2	Ras association (RalGDS/AF-6) domain family member 2 [Source:MGI Symbol;Acc:MGI:2442060]	protein_coding	ENSMUST00000028814,ENSMUST00000103182,ENSMUST00000139047,ENSMUST00000140791,ENSMUST00000155829	-	chr2	131989415	132030258	47.98
ENSMUSG00000098557	-0.41334	420.783651312334,0.117761724365059,-3.50996710391844	0.000448162	0.0185869	0	Kctd12	potassium channel tetramerisation domain containing 12 [Source:MGI Symbol;Acc:MGI:2145823]	protein_coding	ENSMUST00000183756,ENSMUST00000184744	-	chr14	102976581	102982637	45.19
ENSMUSG00000030410	0.353578	440.476297908551,0.101040353457561,3.49937045386746	0.000466358	0.0192848	0	Dmwd	dystrophia myotonica-containing WD repeat motif [Source:MGI Symbol;Acc:MGI:94907]	protein_coding	ENSMUST00000032570,ENSMUST00000108479,ENSMUST00000138997,ENSMUST00000146429	+	chr7	19076227	19082776	57.73
ENSMUSG00000030342	-0.400399	396.070502524055,0.114477872772499,-3.49761403253982	0.00046944	0.0193555	0	Cd9	CD9 antigen [Source:MGI Symbol;Acc:MGI:88348]	protein_coding	ENSMUST00000032492,ENSMUST00000130132,ENSMUST00000140024	-	chr6	125460266	125494791	50.16
ENSMUSG00000035314	0.614739	89.608258647632,0.176150179785004,3.48985872167902	0.000483276	0.0198679	1	Gdpd5	glycerophosphodiester phosphodiesterase domain containing 5 [Source:MGI Symbol;Acc:MGI:2686926]	protein_coding	ENSMUST00000037528,ENSMUST00000207238,ENSMUST00000207530,ENSMUST00000207617,ENSMUST00000208061,ENSMUST00000208800,ENSMUST00000208947	+	chr7	99381414	99461877	52.58
ENSMUSG00000023004	-1.0114	872.653232827029,0.289932740399572,-3.48837816400456	0.00048596	0.019903	-1	Tuba1b	tubulin, alpha 1B [Source:MGI Symbol;Acc:MGI:107804]	protein_coding	ENSMUST00000077577,ENSMUST00000140969	-	chr15	98931425	98934565	53.49
ENSMUSG00000021458	-0.368206	305.079767659525,0.105577150018554,-3.48755505403636	0.000487459	0.019903	0	2010111I01Rik	RIKEN cDNA 2010111I01 gene [Source:MGI Symbol;Acc:MGI:1919311]	protein_coding	ENSMUST00000021911,ENSMUST00000091560,ENSMUST00000159152	+	chr13	63014934	63326096	45.08
ENSMUSG00000021069	-1.09826	131.108156980167,0.314953843566878,-3.48705850369652	0.000488365	0.019903	-1	Pygl	liver glycogen phosphorylase [Source:MGI Symbol;Acc:MGI:97829]	protein_coding	ENSMUST00000071250,ENSMUST00000161083,ENSMUST00000161840,ENSMUST00000162613,ENSMUST00000166609	-	chr12	70190811	70231488	46.05
ENSMUSG00000002346	0.453038	438.631669722152,0.129984458926652,3.48532754386286	0.000491535	0.0199745	0	Slc25a42	solute carrier family 25, member 42 [Source:MGI Symbol;Acc:MGI:1920345]	protein_coding	ENSMUST00000063788,ENSMUST00000110127,ENSMUST00000134596,ENSMUST00000139333,ENSMUST00000150706	-	chr8	70184340	70212305	50.79
ENSMUSG00000043795	0.194664	1878.08011369952,0.0558761969248125,3.48383639075806	0.000494282	0.0200283	0	Prr33	proline rich 33 [Source:MGI Symbol;Acc:MGI:3642289]	protein_coding	ENSMUST00000054910,ENSMUST00000151580	-	chr7	142491074	142506771	52.16
ENSMUSG00000029840	-0.41331	890.37628155577,0.118676037912801,-3.48267153844319	0.000496437	0.020058	0	Mtpn	myotrophin [Source:MGI Symbol;Acc:MGI:99445]	protein_coding	ENSMUST00000031866,ENSMUST00000201026	-	chr6	35508906	35539888	37.01
ENSMUSG00000041559	-0.59649	2012.4821065562,0.171363505369099,-3.48084766342014	0.00049983	0.0201374	-1	Fmod	fibromodulin [Source:MGI Symbol;Acc:MGI:1328364]	protein_coding	ENSMUST00000048183,ENSMUST00000162779	+	chr1	134037254	134048277	51.31
ENSMUSG00000060791	-1.67536	35.2363098387164,0.481790833727537,-3.47736409731377	0.00050637	0.0203428	-1	Gmfg	glia maturation factor, gamma [Source:MGI Symbol;Acc:MGI:1927135]	protein_coding	ENSMUST00000078845,ENSMUST00000108289,ENSMUST00000108292,ENSMUST00000135686,ENSMUST00000138741	+	chr7	28437447	28448233	46.64
ENSMUSG00000037818	-0.471106	625.59700474185,0.135563455077174,-3.47516750462739	0.000510534	0.0204365	0	Abhd18	abhydrolase domain containing 18 [Source:MGI Symbol;Acc:MGI:1915468]	protein_coding	ENSMUST00000108077,ENSMUST00000108078,ENSMUST00000159774,ENSMUST00000203214,ENSMUST00000203472,ENSMUST00000203650,ENSMUST00000203892,ENSMUST00000204464,ENSMUST00000204496,ENSMUST00000204797,ENSMUST00000205065	+	chr3	40846970	40938138	40.81
ENSMUSG00000026502	0.222497	1013.21626758261,0.0640351151859064,3.47460747263717	0.000511601	0.0204365	0	Desi2	desumoylating isopeptidase 2 [Source:MGI Symbol;Acc:MGI:1926075]	protein_coding	ENSMUST00000027783,ENSMUST00000069568,ENSMUST00000159284,ENSMUST00000161075	+	chr1	178187417	178257301	41.35
ENSMUSG00000052160	-0.739633	84.7456000218829,0.212941250513332,-3.47341541434835	0.000513879	0.0204408	-1	Pld4	phospholipase D family, member 4 [Source:MGI Symbol;Acc:MGI:2144765]	protein_coding	ENSMUST00000063888	+	chr12	112760655	112768986	53.68
ENSMUSG00000024659	-0.670769	669.820690326267,0.193136282134445,-3.4730346233009	0.000514609	0.0204408	-1	Anxa1	annexin A1 [Source:MGI Symbol;Acc:MGI:96819]	protein_coding	ENSMUST00000025561,ENSMUST00000163902,ENSMUST00000164587,ENSMUST00000165518,ENSMUST00000167668,ENSMUST00000168020,ENSMUST00000171423	-	chr19	20373428	20390944	37.27
ENSMUSG00000022464	0.261945	1232.82814525403,0.0755049759449571,3.46923958744757	0.000521934	0.0206736	0	Slc38a4	solute carrier family 38, member 4 [Source:MGI Symbol;Acc:MGI:1916604]	protein_coding	ENSMUST00000023101,ENSMUST00000166223	-	chr15	96994823	97055956	44.24
ENSMUSG00000027602	0.279575	1052.52057701207,0.0806221366276513,3.46772363874229	0.000524887	0.0207323	0	Map1lc3a	microtubule-associated protein 1 light chain 3 alpha [Source:MGI Symbol;Acc:MGI:1915661]	protein_coding	ENSMUST00000029128,ENSMUST00000145086,ENSMUST00000154596	+	chr2	155276297	155278073	65.62
ENSMUSG00000016239	-1.24471	25.3145103580452,0.359082289430043,-3.46637244166981	0.000527532	0.0207786	-1	Lonrf3	LON peptidase N-terminal domain and ring finger 3 [Source:MGI Symbol;Acc:MGI:1921615]	protein_coding	ENSMUST00000016383,ENSMUST00000126147,ENSMUST00000135758	+	chrX	36328353	36362341	43.18
ENSMUSG00000013698	-0.31483	521.523144729995,0.0908971791107232,-3.46358174891426	0.000533035	0.0209137	0	Pea15a	phosphoprotein enriched in astrocytes 15A [Source:MGI Symbol;Acc:MGI:104799]	protein_coding	ENSMUST00000013842,ENSMUST00000111247,ENSMUST00000125361,ENSMUST00000152432,ENSMUST00000155109	-	chr1	172196728	172206804	51.34
ENSMUSG00000019122	-1.01722	239.118158873468,0.293728674748052,-3.46313048227438	0.000533929	0.0209137	-1	Ccl9	chemokine (C-C motif) ligand 9 [Source:MGI Symbol;Acc:MGI:104533]	protein_coding	ENSMUST00000019266,ENSMUST00000136131	-	chr11	83572919	83578636	42.69
ENSMUSG00000042834	-0.509675	991.736150797834,0.147242680481173,-3.46145967637736	0.000537255	0.0209857	0	Nrep	neuronal regeneration related protein [Source:MGI Symbol;Acc:MGI:99444]	protein_coding	ENSMUST00000051087,ENSMUST00000168890,ENSMUST00000171533	-	chr18	33437019	33464029	43.05
ENSMUSG00000028496	0.262965	2168.83176558901,0.0760254998600005,3.45890431694138	0.000542378	0.0211273	0	Mllt3	myeloid/lymphoid or mixed-lineage leukemia (trithorax homolog, Drosophila); translocated to, 3 [Source:MGI Symbol;Acc:MGI:1917372]	protein_coding	ENSMUST00000078090,ENSMUST00000126353,ENSMUST00000128930,ENSMUST00000134555,ENSMUST00000141526,ENSMUST00000142454,ENSMUST00000148059,ENSMUST00000149357	-	chr4	87769925	88033364	40.72
ENSMUSG00000060586	-0.555058	549.254669483002,0.160519474640039,-3.45788575554772	0.000544432	0.0211489	0	H2-Eb1	histocompatibility 2, class II antigen E beta [Source:MGI Symbol;Acc:MGI:95901]	protein_coding	ENSMUST00000074557	+	chr17	34305877	34316199	48.46
ENSMUSG00000021892	0.335678	383.065895565697,0.0971595274349926,3.45491493801463	0.000550466	0.0213245	0	Sh3bp5	SH3-domain binding protein 5 (BTK-associated) [Source:MGI Symbol;Acc:MGI:1344391]	protein_coding	ENSMUST00000091903,ENSMUST00000100730,ENSMUST00000140002,ENSMUST00000147586	-	chr14	31359880	31436078	47.26
ENSMUSG00000089872	0.395727	341.644861889603,0.114714959878571,3.4496553354139	0.000561303	0.0216847	0	Rps6kc1	ribosomal protein S6 kinase polypeptide 1 [Source:MGI Symbol;Acc:MGI:2443419]	protein_coding	ENSMUST00000061611,ENSMUST00000159066,ENSMUST00000159367,ENSMUST00000159624,ENSMUST00000159823,ENSMUST00000160889,ENSMUST00000160891,ENSMUST00000162500,ENSMUST00000162692	-	chr1	190700202	190911770	46.57
ENSMUSG00000020108	0.766874	177.64314217016,0.222391466728135,3.44830453359069	0.000564118	0.0217339	1	Ddit4	DNA-damage-inducible transcript 4 [Source:MGI Symbol;Acc:MGI:1921997]	protein_coding	ENSMUST00000020308	-	chr10	59949675	59951770	57.78
ENSMUSG00000066324	0.178172	2669.58929377451,0.051749897494737,3.44295102199363	0.000575404	0.0221084	0	Impad1	inositol monophosphatase domain containing 1 [Source:MGI Symbol;Acc:MGI:1915720]	protein_coding	ENSMUST00000084949	-	chr4	4762484	4793355	39.65
ENSMUSG00000039497	-0.516321	195.350525699814,0.150029791293524,-3.44145867236456	0.000578587	0.0221666	0	Dse	dermatan sulfate epimerase [Source:MGI Symbol;Acc:MGI:2443455]	protein_coding	ENSMUST00000048010	-	chr10	34151394	34207551	40.51
ENSMUSG00000035765	0.24357	1195.71230443241,0.0707964773354443,3.44042633770193	0.000580799	0.0221666	0	Dym	dymeclin [Source:MGI Symbol;Acc:MGI:1918480]	protein_coding	ENSMUST00000039608	+	chr18	75018772	75286966	45.51
ENSMUSG00000042650	0.167598	2780.67458495203,0.0487198763988904,3.44003682510629	0.000581635	0.0221666	0	Alkbh5	alkB homolog 5, RNA demethylase [Source:MGI Symbol;Acc:MGI:2144489]	protein_coding	ENSMUST00000044250,ENSMUST00000134770	+	chr11	60536381	60558512	45.23
ENSMUSG00000021798	0.202833	24803.4242262885,0.05898171047254,3.43891287948235	0.000584055	0.0221988	0	Ldb3	LIM domain binding 3 [Source:MGI Symbol;Acc:MGI:1344412]	protein_coding	ENSMUST00000022327,ENSMUST00000022328,ENSMUST00000022330,ENSMUST00000064098,ENSMUST00000090040	-	chr14	34526699	34588681	49.13
ENSMUSG00000034377	0.213512	2286.76821249077,0.0621109886391769,3.43759141409254	0.000586913	0.0222475	0	Tulp4	tubby like protein 4 [Source:MGI Symbol;Acc:MGI:1916092]	protein_coding	ENSMUST00000039655,ENSMUST00000126982,ENSMUST00000137063,ENSMUST00000141059,ENSMUST00000142030,ENSMUST00000144124,ENSMUST00000145340,ENSMUST00000146758,ENSMUST00000149756,ENSMUST00000149838,ENSMUST00000151732,ENSMUST00000152672	+	chr17	6106437	6251128	44.35
ENSMUSG00000024835	-0.516472	220.583835485697,0.150419076696059,-3.43355259234703	0.000595727	0.0225108	0	Coro1b	coronin, actin binding protein 1B [Source:MGI Symbol;Acc:MGI:1345963]	protein_coding	ENSMUST00000008893,ENSMUST00000123874,ENSMUST00000134194,ENSMUST00000135498,ENSMUST00000140419,ENSMUST00000142878,ENSMUST00000143613,ENSMUST00000148189,ENSMUST00000148733	+	chr19	4148619	4154035	56.23
ENSMUSG00000052957	-0.420429	407.106224594194,0.122468598016063,-3.43295013279268	0.000597052	0.0225108	0	Gas1	growth arrest specific 1 [Source:MGI Symbol;Acc:MGI:95655]	protein_coding	ENSMUST00000065086	-	chr13	60174405	60177365	58.36
ENSMUSG00000039891	0.260263	8684.61614001961,0.07585330159087,3.43113091966315	0.00060107	0.0225758	0	Txlnb	taxilin beta [Source:MGI Symbol;Acc:MGI:2671945]	protein_coding	ENSMUST00000037964,ENSMUST00000175676	+	chr10	17796226	17845665	40.97
ENSMUSG00000003865	0.233573	5753.32657976534,0.0680827577919559,3.43072158266949	0.000601978	0.0225758	0	Gys1	glycogen synthase 1, muscle [Source:MGI Symbol;Acc:MGI:101805]	protein_coding	ENSMUST00000003964	+	chr7	45434839	45456617	49.64
ENSMUSG00000036144	-0.428513	202.640497465341,0.124974779488784,-3.42879279418776	0.000606272	0.0226765	0	Meox2	mesenchyme homeobox 2 [Source:MGI Symbol;Acc:MGI:103219]	protein_coding	ENSMUST00000041183	+	chr12	37108540	37179534	36.93
ENSMUSG00000026971	0.394107	642.688146955038,0.11496550190163,3.42804717030941	0.00060794	0.0226787	0	Itgb6	integrin beta 6 [Source:MGI Symbol;Acc:MGI:96615]	protein_coding	ENSMUST00000028348,ENSMUST00000059888,ENSMUST00000112517,ENSMUST00000133887,ENSMUST00000142696,ENSMUST00000145009,ENSMUST00000147906,ENSMUST00000151035,ENSMUST00000154764	-	chr2	60598292	60722643	43.1
ENSMUSG00000069874	-0.365145	688.434708188703,0.106624203838631,-3.42459742614869	0.000615711	0.022908	0	Irgm2	immunity-related GTPase family M member 2 [Source:MGI Symbol;Acc:MGI:1926262]	protein_coding	ENSMUST00000058704,ENSMUST00000108836,ENSMUST00000209079	+	chr11	58199618	58222782	47.03
ENSMUSG00000055489	0.248432	4260.80776386252,0.0726817623593796,3.41807983941149	0.000630646	0.0232483	0	Ano5	anoctamin 5 [Source:MGI Symbol;Acc:MGI:3576659]	protein_coding	ENSMUST00000043944,ENSMUST00000207044,ENSMUST00000207717	+	chr7	51511029	51598709	39.51
ENSMUSG00000036712	0.255586	706.938647364098,0.0747776312270518,3.41794590876011	0.000630956	0.0232483	0	Cyld	cylindromatosis (turban tumor syndrome) [Source:MGI Symbol;Acc:MGI:1921506]	protein_coding	ENSMUST00000043526,ENSMUST00000098519,ENSMUST00000109626	+	chr8	88697028	88751945	38.47
ENSMUSG00000013539	0.353481	363.948426096374,0.103427592722486,3.4176683253968	0.0006316	0.0232483	0	Tango2	transport and golgi organization 2 [Source:MGI Symbol;Acc:MGI:101825]	protein_coding	ENSMUST00000115628,ENSMUST00000125287,ENSMUST00000128580,ENSMUST00000130752,ENSMUST00000134385,ENSMUST00000142677,ENSMUST00000145203,ENSMUST00000145758,ENSMUST00000150152,ENSMUST00000152684	-	chr16	18300825	18348103	47.51
ENSMUSG00000041920	-0.535964	155.223178356747,0.156843539080935,-3.41718631916765	0.00063272	0.0232483	0	Slc16a6	solute carrier family 16 (monocarboxylic acid transporters), member 6 [Source:MGI Symbol;Acc:MGI:2144585]	protein_coding	ENSMUST00000032206,ENSMUST00000070152,ENSMUST00000070872,ENSMUST00000129901,ENSMUST00000168740	-	chr11	109450855	109473598	47.01
ENSMUSG00000038437	0.280304	886.625151205748,0.082031772921727,3.41702249612705	0.0006331	0.0232483	0	Mllt6	myeloid/lymphoid or mixed-lineage leukemia (trithorax homolog, Drosophila); translocated to, 6 [Source:MGI Symbol;Acc:MGI:1935145]	protein_coding	ENSMUST00000044730,ENSMUST00000107586,ENSMUST00000134158,ENSMUST00000143220,ENSMUST00000151729,ENSMUST00000155835	+	chr11	97663414	97685463	55.19
ENSMUSG00000027022	0.275547	50509.7077786872,0.0806830535866092,3.41517294795395	0.000637415	0.023346	0	Xirp2	xin actin-binding repeat containing 2 [Source:MGI Symbol;Acc:MGI:2685198]	protein_coding	ENSMUST00000028410,ENSMUST00000112347	+	chr2	67446002	67526614	38.72
ENSMUSG00000063760	0.287337	527.934576746787,0.0841561453679299,3.41433570238521	0.000639377	0.0233572	0	Rnf217	ring finger protein 217 [Source:MGI Symbol;Acc:MGI:3610311]	protein_coding	ENSMUST00000081989	-	chr10	31493193	31609184	39.58
ENSMUSG00000027201	-0.740311	65.2517329865871,0.21697600593006,-3.41194705904269	0.000645006	0.0235019	-1	Myef2	myelin basic protein expression factor 2, repressor [Source:MGI Symbol;Acc:MGI:104592]	protein_coding	ENSMUST00000067780,ENSMUST00000089825,ENSMUST00000110501,ENSMUST00000129945,ENSMUST00000137091,ENSMUST00000142718,ENSMUST00000147105,ENSMUST00000149911,ENSMUST00000152367	-	chr2	125084628	125123661	37.85
ENSMUSG00000029622	-0.7222	432.386483205265,0.211741015173115,-3.41077108801549	0.000647795	0.023504	-1	Arpc1b	actin related protein 2/3 complex, subunit 1B [Source:MGI Symbol;Acc:MGI:1343142]	protein_coding	ENSMUST00000085679,ENSMUST00000126343,ENSMUST00000128229,ENSMUST00000129033,ENSMUST00000136074,ENSMUST00000138235,ENSMUST00000138900,ENSMUST00000138922,ENSMUST00000141602,ENSMUST00000144375,ENSMUST00000196111	+	chr5	145114215	145130705	52.77
ENSMUSG00000028034	-0.318523	650.287456341148,0.0933943820749964,-3.41051719854669	0.000648398	0.023504	0	Fubp1	far upstream element (FUSE) binding protein 1 [Source:MGI Symbol;Acc:MGI:1196294]	protein_coding	ENSMUST00000106121,ENSMUST00000166984,ENSMUST00000196062,ENSMUST00000196429,ENSMUST00000196695,ENSMUST00000196739,ENSMUST00000197141,ENSMUST00000198046,ENSMUST00000198227,ENSMUST00000198405,ENSMUST00000198539,ENSMUST00000199127,ENSMUST00000199199,ENSMUST00000199202,ENSMUST00000199876,ENSMUST00000199918,ENSMUST00000200056,ENSMUST00000200207,ENSMUST00000200452,ENSMUST00000200524	+	chr3	152210422	152236826	38.56
ENSMUSG00000031246	-0.510644	508.608915894391,0.149951616413471,-3.40539344490147	0.000660688	0.0238419	0	Sh3bgrl	SH3-binding domain glutamic acid-rich protein like [Source:MGI Symbol;Acc:MGI:1930849]	protein_coding	ENSMUST00000033598,ENSMUST00000126097,ENSMUST00000133614	+	chrX	109095365	109197873	37.5
ENSMUSG00000035189	1.50881	16.6107796741867,0.443087569144348,3.40522251309066	0.000661102	0.0238419	1	Ano4	anoctamin 4 [Source:MGI Symbol;Acc:MGI:2443344]	protein_coding	ENSMUST00000180843,ENSMUST00000181976,ENSMUST00000182041,ENSMUST00000182341,ENSMUST00000182419,ENSMUST00000182462,ENSMUST00000182598,ENSMUST00000182613,ENSMUST00000182624,ENSMUST00000182790,ENSMUST00000182888,ENSMUST00000183268	-	chr10	88948994	89344762	40.52
ENSMUSG00000007041	-0.813669	188.966844005617,0.239180182640384,-3.40190868246802	0.00066917	0.0240713	-1	Clic1	chloride intracellular channel 1 [Source:MGI Symbol;Acc:MGI:2148924]	protein_coding	ENSMUST00000007257,ENSMUST00000172599	+	chr17	35049966	35058749	49.54
ENSMUSG00000037458	-0.325628	963.575532642402,0.0957934946632653,-3.39927388436549	0.00067565	0.0242309	0	Azin1	antizyme inhibitor 1 [Source:MGI Symbol;Acc:MGI:1859169]	protein_coding	ENSMUST00000065308,ENSMUST00000110328,ENSMUST00000110329,ENSMUST00000127848,ENSMUST00000129589,ENSMUST00000149293,ENSMUST00000151319,ENSMUST00000152833	-	chr15	38487430	38519266	38.91
ENSMUSG00000032902	-0.340472	1043.52932226049,0.100176817377409,-3.39871049866346	0.000677043	0.0242309	0	Slc16a1	solute carrier family 16 (monocarboxylic acid transporters), member 1 [Source:MGI Symbol;Acc:MGI:106013]	protein_coding	ENSMUST00000046212	+	chr3	104638668	104658462	42.42
ENSMUSG00000014303	-0.603679	102.084801989974,0.177748470210533,-3.39625482738807	0.000683147	0.0243875	-1	Glis2	GLIS family zinc finger 2 [Source:MGI Symbol;Acc:MGI:1932535]	protein_coding	ENSMUST00000014447,ENSMUST00000122896,ENSMUST00000127120,ENSMUST00000135577,ENSMUST00000141682	+	chr16	4594713	4624924	53.04
ENSMUSG00000004360	0.280607	706.7523334535,0.082645300963031,3.39531556063564	0.000685495	0.0244095	0	9330159F19Rik	RIKEN cDNA 9330159F19 gene [Source:MGI Symbol;Acc:MGI:3036239]	protein_coding	ENSMUST00000092627	+	chr10	29211643	29230779	37.14
ENSMUSG00000004730	-0.747026	127.744251103215,0.22008048988307,-3.39433113849514	0.000687965	0.0244357	-1	Adgre1	adhesion G protein-coupled receptor E1 [Source:MGI Symbol;Acc:MGI:106912]	protein_coding	ENSMUST00000004850,ENSMUST00000086763	+	chr17	57358686	57483529	41.16
ENSMUSG00000029096	-0.451051	862.656070332868,0.133028032389603,-3.39064605760735	0.000697281	0.0247044	0	Htra3	HtrA serine peptidase 3 [Source:MGI Symbol;Acc:MGI:1925808]	protein_coding	ENSMUST00000087629,ENSMUST00000114233,ENSMUST00000129459,ENSMUST00000137935,ENSMUST00000200810,ENSMUST00000201028	-	chr5	35652023	35679782	52.94
ENSMUSG00000030730	0.244285	320645.232966788,0.0720974874395476,3.38826359844073	0.000703366	0.0248149	0	Atp2a1	ATPase, Ca++ transporting, cardiac muscle, fast twitch 1 [Source:MGI Symbol;Acc:MGI:105058]	protein_coding	ENSMUST00000032974,ENSMUST00000146973	-	chr7	126445858	126463108	51.83
ENSMUSG00000037720	-0.305363	501.952963527073,0.0901295782972605,-3.38804782766386	0.00070392	0.0248149	0	Tmem33	transmembrane protein 33 [Source:MGI Symbol;Acc:MGI:1915128]	protein_coding	ENSMUST00000037918,ENSMUST00000160352,ENSMUST00000161233,ENSMUST00000161369,ENSMUST00000162074,ENSMUST00000162543,ENSMUST00000163028,ENSMUST00000201979,ENSMUST00000202324	+	chr5	67260565	67291461	41.26
ENSMUSG00000029787	-0.581215	135.896451121146,0.171640023065176,-3.38624557849309	0.000708559	0.0249162	0	Avl9	AVL9 homolog (S. cerevisiase) [Source:MGI Symbol;Acc:MGI:1926187]	protein_coding	ENSMUST00000031805,ENSMUST00000176560,ENSMUST00000177249,ENSMUST00000204193,ENSMUST00000205188	+	chr6	56714899	56761912	38.42
ENSMUSG00000031808	0.428768	897.714689106487,0.126679455021544,3.384667824831	0.000712644	0.0249975	0	Slc27a1	solute carrier family 27 (fatty acid transporter), member 1 [Source:MGI Symbol;Acc:MGI:1347098]	protein_coding	ENSMUST00000034267	+	chr8	71568927	71586708	52.77
ENSMUSG00000056481	-0.515335	330.059192574246,0.15229436362476,-3.38380675855439	0.000714883	0.0250138	0	Cd248	CD248 antigen, endosialin [Source:MGI Symbol;Acc:MGI:1917695]	protein_coding	ENSMUST00000070630	+	chr19	5068078	5070637	61.37
ENSMUSG00000022971	-0.621459	89.4731344433481,0.183707472612261,-3.38287288494897	0.000717318	0.0250369	-1	Ifnar2	interferon (alpha and beta) receptor 2 [Source:MGI Symbol;Acc:MGI:1098243]	protein_coding	ENSMUST00000023693,ENSMUST00000089042,ENSMUST00000117836,ENSMUST00000134491,ENSMUST00000139503	+	chr16	91372783	91405589	45.54
ENSMUSG00000001281	-0.858994	48.0890208778111,0.254048784622012,-3.38121545663531	0.000721659	0.0251262	-1	Itgb7	integrin beta 7 [Source:MGI Symbol;Acc:MGI:96616]	protein_coding	ENSMUST00000001327,ENSMUST00000127014	-	chr15	102215995	102231935	49.53
ENSMUSG00000002265	0.544047	618.560298181432,0.161031938076801,3.37850443293672	0.000728813	0.0253128	0	Peg3	paternally expressed 3 [Source:MGI Symbol;Acc:MGI:104748]	protein_coding	ENSMUST00000051209,ENSMUST00000143703,ENSMUST00000150182,ENSMUST00000155910	-	chr7	6703892	6730431	44.95
ENSMUSG00000029185	-0.504127	179.171351931032,0.149305252297521,-3.37648364276747	0.000734187	0.0253902	0	Fam114a1	family with sequence similarity 114, member A1 [Source:MGI Symbol;Acc:MGI:1915553]	protein_coding	ENSMUST00000031080,ENSMUST00000139366	+	chr5	64970071	65041886	44.54
ENSMUSG00000016262	-0.668973	64.3927255142629,0.198137029939272,-3.37631274820696	0.000734644	0.0253902	-1	Sertad4	SERTA domain containing 4 [Source:MGI Symbol;Acc:MGI:2443496]	protein_coding	ENSMUST00000016406,ENSMUST00000125391,ENSMUST00000155503,ENSMUST00000155579	-	chr1	192844488	192855756	49.37
ENSMUSG00000031799	-0.299798	774.91576029251,0.0888200703375071,-3.37533650183385	0.000737255	0.0254182	0	Tpm4	tropomyosin 4 [Source:MGI Symbol;Acc:MGI:2449202]	protein_coding	ENSMUST00000003575,ENSMUST00000123177	+	chr8	72134975	72153142	46.79
ENSMUSG00000030319	0.217898	1715.5553558362,0.0645834647680842,3.37389608350309	0.000741123	0.0254223	0	Cand2	cullin-associated and neddylation-dissociated 2 (putative) [Source:MGI Symbol;Acc:MGI:1914338]	protein_coding	ENSMUST00000075995	+	chr6	115774538	115805557	50.26
ENSMUSG00000037362	-0.552102	214.216581669009,0.163687473633455,-3.37290477836382	0.000743797	0.0254223	0	Nov	nephroblastoma overexpressed gene [Source:MGI Symbol;Acc:MGI:109185]	protein_coding	ENSMUST00000050027	+	chr15	54745702	54754039	41.83
ENSMUSG00000057777	-1.87406	22.9128818328986,0.555796826152885,-3.37184395154443	0.000746667	0.0254223	-1	Mab21l2	mab-21-like 2 (C. elegans) [Source:MGI Symbol;Acc:MGI:1346022]	protein_coding	ENSMUST00000077524,ENSMUST00000191695	-	chr3	86545581	86548629	47.75
ENSMUSG00000017009	-0.435965	384.998153043132,0.129298926946329,-3.37176061615874	0.000746893	0.0254223	0	Sdc4	syndecan 4 [Source:MGI Symbol;Acc:MGI:1349164]	protein_coding	ENSMUST00000017153,ENSMUST00000142909	-	chr2	164424247	164443887	51.13
ENSMUSG00000037824	-0.467443	235.654454318072,0.138662532170814,-3.37108714211193	0.000748722	0.0254223	0	Tspan14	tetraspanin 14 [Source:MGI Symbol;Acc:MGI:1196325]	protein_coding	ENSMUST00000047652	-	chr14	40906445	40966807	47.99
ENSMUSG00000015357	0.277926	1290.61068241314,0.0824498408480073,3.3708493712484	0.000749368	0.0254223	0	Clpx	caseinolytic mitochondrial matrix peptidase chaperone subunit [Source:MGI Symbol;Acc:MGI:1346017]	protein_coding	ENSMUST00000015501,ENSMUST00000113824,ENSMUST00000147279,ENSMUST00000148632	+	chr9	65294260	65330658	40.74
ENSMUSG00000030592	0.277483	41665.6972851242,0.0823240509930633,3.37061949503742	0.000749994	0.0254223	0	Ryr1	ryanodine receptor 1, skeletal muscle [Source:MGI Symbol;Acc:MGI:99659]	protein_coding	ENSMUST00000032813,ENSMUST00000179893,ENSMUST00000207764,ENSMUST00000207783,ENSMUST00000208010,ENSMUST00000208318,ENSMUST00000208922	-	chr7	29003344	29125179	50.71
ENSMUSG00000005506	0.215681	1413.83668479389,0.0640638754652544,3.36665161166459	0.000760867	0.025729	0	Celf1	CUGBP, Elav-like family member 1 [Source:MGI Symbol;Acc:MGI:1342295]	protein_coding	ENSMUST00000005643,ENSMUST00000068726,ENSMUST00000068747,ENSMUST00000111448,ENSMUST00000111449,ENSMUST00000111451,ENSMUST00000111452,ENSMUST00000111455,ENSMUST00000127385,ENSMUST00000127580,ENSMUST00000133657,ENSMUST00000150546,ENSMUST00000154442,ENSMUST00000177642	+	chr2	90940382	91019497	40.91
ENSMUSG00000025784	-0.476502	790.986895822849,0.1415801766158,-3.36559694962596	0.000763782	0.0257579	0	Clec3b	C-type lectin domain family 3, member b [Source:MGI Symbol;Acc:MGI:104540]	protein_coding	ENSMUST00000026890	+	chr9	123150946	123157430	50.02
ENSMUSG00000071984	-0.427176	955.292949534996,0.12694611053615,-3.36502181752451	0.000765376	0.0257579	0	Fndc1	fibronectin type III domain containing 1 [Source:MGI Symbol;Acc:MGI:1915905]	protein_coding	ENSMUST00000097424,ENSMUST00000097425,ENSMUST00000114579,ENSMUST00000167580,ENSMUST00000169126	-	chr17	7738569	7827302	44.97
ENSMUSG00000057193	0.164992	2968.0162338376,0.0490481879984157,3.36387082415745	0.000768575	0.025804	0	Slc44a2	solute carrier family 44, member 2 [Source:MGI Symbol;Acc:MGI:1915932]	protein_coding	ENSMUST00000034697	+	chr9	21337828	21355025	49.44
ENSMUSG00000035890	0.417897	342.719068964388,0.124266360129975,3.36291562382708	0.000771239	0.0258319	0	Rnf126	ring finger protein 126 [Source:MGI Symbol;Acc:MGI:1917544]	protein_coding	ENSMUST00000047203	-	chr10	79758515	79766952	56.38
ENSMUSG00000074064	0.491912	1015.97569889775,0.146493405794082,3.35791316223947	0.000785333	0.0262054	0	Mlycd	malonyl-CoA decarboxylase [Source:MGI Symbol;Acc:MGI:1928485]	protein_coding	ENSMUST00000098367,ENSMUST00000145121	+	chr8	119394878	119411102	52.2
ENSMUSG00000003746	-0.450299	586.185382749864,0.134128779710292,-3.35721225924199	0.000787326	0.0262054	0	Man1a	mannosidase 1, alpha [Source:MGI Symbol;Acc:MGI:104677]	protein_coding	ENSMUST00000003843,ENSMUST00000105469,ENSMUST00000105470,ENSMUST00000133330,ENSMUST00000146483	-	chr10	53904788	54075796	39.87
ENSMUSG00000066406	0.296521	1212.70910776155,0.0883294754017136,3.35698825777273	0.000787965	0.0262054	0	Akap13	A kinase (PRKA) anchor protein 13 [Source:MGI Symbol;Acc:MGI:2676556]	protein_coding	ENSMUST00000166315,ENSMUST00000207079,ENSMUST00000207239,ENSMUST00000207511,ENSMUST00000207750,ENSMUST00000207751,ENSMUST00000207923,ENSMUST00000207998,ENSMUST00000208009,ENSMUST00000208053,ENSMUST00000208182,ENSMUST00000208187,ENSMUST00000208248,ENSMUST00000208456,ENSMUST00000208708,ENSMUST00000209040	+	chr7	75455534	75754609	40.73
ENSMUSG00000021134	0.226585	1725.36833133829,0.0675461785529643,3.35451583253085	0.00079504	0.0263785	0	Srsf5	serine/arginine-rich splicing factor 5 [Source:MGI Symbol;Acc:MGI:98287]	protein_coding	ENSMUST00000094693,ENSMUST00000110351,ENSMUST00000110352,ENSMUST00000110354,ENSMUST00000110356,ENSMUST00000125814,ENSMUST00000133783,ENSMUST00000138434,ENSMUST00000151036,ENSMUST00000151968,ENSMUST00000152662,ENSMUST00000153056	+	chr12	80945504	80950507	44.7
ENSMUSG00000018796	0.439086	5348.10168876476,0.13093295145589,3.35351936507712	0.000797908	0.0264115	0	Acsl1	acyl-CoA synthetase long-chain family member 1 [Source:MGI Symbol;Acc:MGI:102797]	protein_coding	ENSMUST00000034046,ENSMUST00000110371,ENSMUST00000110372,ENSMUST00000128746,ENSMUST00000130563,ENSMUST00000133161,ENSMUST00000135955,ENSMUST00000152423	+	chr8	46471041	46536051	46.56
ENSMUSG00000048388	-0.766908	56.7448105630548,0.228992693942365,-3.3490518632533	0.000810886	0.0267782	-1	Fam171b	family with sequence similarity 171, member B [Source:MGI Symbol;Acc:MGI:2444579]	protein_coding	ENSMUST00000051454,ENSMUST00000148184	+	chr2	83812636	83883486	41.13
ENSMUSG00000020573	-1.20895	40.5253768086158,0.361759048894966,-3.34187059968419	0.000832158	0.0273748	-1	Pik3cg	phosphoinositide-3-kinase, catalytic, gamma polypeptide [Source:MGI Symbol;Acc:MGI:1353576]	protein_coding	ENSMUST00000053215,ENSMUST00000085469,ENSMUST00000126814,ENSMUST00000156904	-	chr12	32173473	32208659	42.37
ENSMUSG00000087090	0.319747	1371.99029231972,0.0956856002393719,3.34164564479773	0.000832833	0.0273748	0	Nctc1	non-coding transcript 1 [Source:MGI Symbol;Acc:MGI:1306816]	processed_transcript	ENSMUST00000123668,ENSMUST00000132167	-	chr7	142544609	142558596	52.07
ENSMUSG00000017493	-0.514416	941.825848644683,0.154008300516709,-3.34018160699946	0.000837236	0.0274555	0	Igfbp4	insulin-like growth factor binding protein 4 [Source:MGI Symbol;Acc:MGI:96439]	protein_coding	ENSMUST00000017637,ENSMUST00000123946,ENSMUST00000130530,ENSMUST00000140772,ENSMUST00000177092,ENSMUST00000177105	+	chr11	99041244	99054392	51.97
ENSMUSG00000033610	0.536337	250.695809264937,0.160694652547454,3.337615883128	0.000845005	0.027646	0	Pank1	pantothenate kinase 1 [Source:MGI Symbol;Acc:MGI:1922985]	protein_coding	ENSMUST00000036584,ENSMUST00000112460	-	chr19	34810894	34879455	43.73
ENSMUSG00000030557	0.157499	2821.97473566629,0.0471992045933607,3.33690687201974	0.000847163	0.0276524	0	Mef2a	myocyte enhancer factor 2A [Source:MGI Symbol;Acc:MGI:99532]	protein_coding	ENSMUST00000032776,ENSMUST00000072460,ENSMUST00000076325,ENSMUST00000107476,ENSMUST00000133074,ENSMUST00000135493,ENSMUST00000144057,ENSMUST00000156690,ENSMUST00000207486,ENSMUST00000207715,ENSMUST00000207794,ENSMUST00000208823	-	chr7	67231163	67372858	37.85
ENSMUSG00000022800	0.219911	1781.78271215846,0.0659594818599633,3.33402628400004	0.000855986	0.0278759	0	Fyttd1	forty-two-three domain containing 1 [Source:MGI Symbol;Acc:MGI:1917955]	protein_coding	ENSMUST00000023489,ENSMUST00000120345,ENSMUST00000125843,ENSMUST00000127493,ENSMUST00000135854,ENSMUST00000137863,ENSMUST00000141590,ENSMUST00000143151,ENSMUST00000145146,ENSMUST00000149183,ENSMUST00000171325	+	chr16	32877500	32908963	39.33
ENSMUSG00000045838	0.408835	261.168152191043,0.122789380150285,3.32956260120845	0.000869825	0.0282613	0	A430105I19Rik	RIKEN cDNA A430105I19 gene [Source:MGI Symbol;Acc:MGI:2685199]	protein_coding	ENSMUST00000059997,ENSMUST00000151270	-	chr2	118754158	118762661	54.13
ENSMUSG00000069792	-1.11302	25.5964512183158,0.334385691990617,-3.32854390854728	0.000873012	0.0282997	-1	Wfdc17	WAP four-disulfide core domain 17 [Source:MGI Symbol;Acc:MGI:3649773]	protein_coding	ENSMUST00000092836	+	chr11	83703991	83706268	44.51
ENSMUSG00000037601	-0.456054	266.749952532391,0.137116422263627,-3.32603707267154	0.000880902	0.0284899	0	Nme1	NME/NM23 nucleoside diphosphate kinase 1 [Source:MGI Symbol;Acc:MGI:97355]	protein_coding	ENSMUST00000021220,ENSMUST00000107844,ENSMUST00000135884	-	chr11	93956979	93968521	46.47
ENSMUSG00000022053	-0.607444	167.344828194716,0.182678798913443,-3.3252011107628	0.000883548	0.0284969	-1	Ebf2	early B cell factor 2 [Source:MGI Symbol;Acc:MGI:894332]	protein_coding	ENSMUST00000022637,ENSMUST00000176029,ENSMUST00000176161,ENSMUST00000177231	+	chr14	67233292	67430918	44.65
ENSMUSG00000036737	0.264414	1470.61198121242,0.079530344234486,3.32469240762896	0.000885161	0.0284969	0	Oxsr1	oxidative-stress responsive 1 [Source:MGI Symbol;Acc:MGI:1917378]	protein_coding	ENSMUST00000040853,ENSMUST00000128880,ENSMUST00000136902,ENSMUST00000143728	-	chr9	119238432	119322427	43.09
ENSMUSG00000021061	0.199592	4003.31479639636,0.0600878946404022,3.32167136915517	0.0008948	0.0287045	0	Sptb	spectrin beta, erythrocytic [Source:MGI Symbol;Acc:MGI:98387]	protein_coding	ENSMUST00000021458,ENSMUST00000166101,ENSMUST00000170532	-	chr12	76580488	76710547	48.73
ENSMUSG00000029482	-0.748965	95.8418096698089,0.225520063827686,-3.32105653114995	0.000896774	0.0287045	-1	Aacs	acetoacetyl-CoA synthetase [Source:MGI Symbol;Acc:MGI:1926144]	protein_coding	ENSMUST00000031445,ENSMUST00000131355,ENSMUST00000144361,ENSMUST00000196556,ENSMUST00000199978,ENSMUST00000200286	+	chr5	125475814	125517410	53.01
ENSMUSG00000026571	0.238772	2949.47569197474,0.0719097329858877,3.3204389392802	0.00089876	0.0287045	0	Dcaf6	DDB1 and CUL4 associated factor 6 [Source:MGI Symbol;Acc:MGI:1921356]	protein_coding	ENSMUST00000027856,ENSMUST00000193353,ENSMUST00000194869,ENSMUST00000195220,ENSMUST00000195686	-	chr1	165328698	165460475	39.07
ENSMUSG00000046691	-0.401136	340.810828531601,0.120819377330824,-3.32013106185849	0.000899752	0.0287045	0	Chtf8	CTF8, chromosome transmission fidelity factor 8 [Source:MGI Symbol;Acc:MGI:2443370]	protein_coding	ENSMUST00000169312,ENSMUST00000175940,ENSMUST00000176090,ENSMUST00000176437,ENSMUST00000176515,ENSMUST00000177068	-	chr8	106883863	106893601	47.33
ENSMUSG00000018927	-0.650817	262.349150448667,0.196136687318934,-3.31818093098754	0.000906058	0.0288405	-1	Ccl6	chemokine (C-C motif) ligand 6 [Source:MGI Symbol;Acc:MGI:98263]	protein_coding	ENSMUST00000019071,ENSMUST00000138145,ENSMUST00000150243	-	chr11	83587882	83593087	43.68
ENSMUSG00000079547	-0.953756	51.9905503343586,0.287565677334277,-3.31665588935534	0.000911017	0.028933	-1	H2-DMb1	histocompatibility 2, class II, locus Mb1 [Source:MGI Symbol;Acc:MGI:95922]	protein_coding	ENSMUST00000114232,ENSMUST00000174765	+	chr17	34153072	34160230	48.83
ENSMUSG00000029512	0.270333	1273.28838295142,0.0815295331870232,3.31576935634257	0.000913912	0.0289375	0	Ulk1	unc-51 like kinase 1 [Source:MGI Symbol;Acc:MGI:1270126]	protein_coding	ENSMUST00000031490,ENSMUST00000196094,ENSMUST00000196440,ENSMUST00000196883,ENSMUST00000197768,ENSMUST00000198470,ENSMUST00000198561,ENSMUST00000199568,ENSMUST00000199717,ENSMUST00000200099,ENSMUST00000200299	-	chr5	110784488	110810097	52.31
ENSMUSG00000057897	0.319452	1932.01239310948,0.0963957430590819,3.31396172080596	0.000919841	0.0289375	0	Camk2b	calcium/calmodulin-dependent protein kinase II, beta [Source:MGI Symbol;Acc:MGI:88257]	protein_coding	ENSMUST00000002817,ENSMUST00000019133,ENSMUST00000066431,ENSMUST00000090443,ENSMUST00000093355,ENSMUST00000101585,ENSMUST00000101586,ENSMUST00000109812,ENSMUST00000109813,ENSMUST00000109815,ENSMUST00000123391,ENSMUST00000129098,ENSMUST00000130427,ENSMUST00000154197,ENSMUST00000155755	-	chr11	5969644	6066362	52.29
ENSMUSG00000044350	-0.877172	34.54038595712,0.264711901819265,-3.31368410576311	0.000920755	0.0289375	-1	Lacc1	laccase (multicopper oxidoreductase) domain containing 1 [Source:MGI Symbol;Acc:MGI:2445077]	protein_coding	ENSMUST00000062789,ENSMUST00000139809,ENSMUST00000142300	-	chr14	77024200	77036904	41.37
ENSMUSG00000015846	0.177628	2201.78052389189,0.0536045209990755,3.31367368387945	0.000920789	0.0289375	0	Rxra	retinoid X receptor alpha [Source:MGI Symbol;Acc:MGI:98214]	protein_coding	ENSMUST00000077257,ENSMUST00000100251,ENSMUST00000113934,ENSMUST00000129514,ENSMUST00000148756,ENSMUST00000166775	+	chr2	27676440	27762957	54.37
ENSMUSG00000019932	-0.706379	148.877897247678,0.213183442588253,-3.31348197954233	0.00092142	0.0289375	-1	Kera	keratocan [Source:MGI Symbol;Acc:MGI:1202398]	protein_coding	ENSMUST00000105286	+	chr10	97607205	97613688	39.11
ENSMUSG00000010461	0.318144	626.003253214377,0.0960867382949657,3.31100846796184	0.000929604	0.0291297	0	Eya4	EYA transcriptional coactivator and phosphatase 4 [Source:MGI Symbol;Acc:MGI:1337104]	protein_coding	ENSMUST00000074366,ENSMUST00000092665	-	chr10	23104168	23349895	39.17
ENSMUSG00000027808	-0.730511	538.397457512354,0.220797152636207,-3.30851552468405	0.00093792	0.0293251	-1	Serp1	stress-associated endoplasmic reticulum protein 1 [Source:MGI Symbol;Acc:MGI:92638]	protein_coding	ENSMUST00000029385	-	chr3	58519817	58525892	42.31
ENSMUSG00000027544	0.709234	174.300337793046,0.2145035050134,3.30639839081076	0.000945036	0.0294357	1	Nfatc2	nuclear factor of activated T cells, cytoplasmic, calcineurin dependent 2 [Source:MGI Symbol;Acc:MGI:102463]	protein_coding	ENSMUST00000029057,ENSMUST00000074618,ENSMUST00000099067,ENSMUST00000109184,ENSMUST00000137451,ENSMUST00000138546,ENSMUST00000140137,ENSMUST00000151292,ENSMUST00000171689	-	chr2	168476410	168601657	51.52
ENSMUSG00000040694	0.198232	3693.60422989147,0.0599572855559345,3.30622184234697	0.000945632	0.0294357	0	Apobec2	apolipoprotein B mRNA editing enzyme, catalytic polypeptide 2 [Source:MGI Symbol;Acc:MGI:1343178]	protein_coding	ENSMUST00000046549	-	chr17	48419231	48432728	48.02
ENSMUSG00000022253	0.296822	769.705124004783,0.0898153396385292,3.30480403606828	0.000950428	0.0295198	0	Nadk2	NAD kinase 2, mitochondrial [Source:MGI Symbol;Acc:MGI:1915896]	protein_coding	ENSMUST00000067760,ENSMUST00000100789,ENSMUST00000100790,ENSMUST00000186069,ENSMUST00000188194,ENSMUST00000189211,ENSMUST00000189437,ENSMUST00000190591,ENSMUST00000190874	+	chr15	9071260	9110487	43.24
ENSMUSG00000044499	0.441849	179.657434053867,0.133804597431335,3.30219368252749	0.000959318	0.0297304	0	Hs3st5	heparan sulfate (glucosamine) 3-O-sulfotransferase 5 [Source:MGI Symbol;Acc:MGI:2441996]	protein_coding	ENSMUST00000058738,ENSMUST00000167191,ENSMUST00000168572,ENSMUST00000171521,ENSMUST00000172357	+	chr10	36506814	36834397	39.28
ENSMUSG00000021596	-1.07725	30.6178587462297,0.326327613967157,-3.30112978328589	0.000962963	0.0297779	-1	Mctp1	multiple C2 domains, transmembrane 1 [Source:MGI Symbol;Acc:MGI:1926021]	protein_coding	ENSMUST00000109583,ENSMUST00000109589,ENSMUST00000122843,ENSMUST00000125209,ENSMUST00000126960,ENSMUST00000137052,ENSMUST00000149028,ENSMUST00000155275	+	chr13	76384535	77031810	38.88
ENSMUSG00000032271	-0.740455	64.4097744321857,0.224937968846849,-3.2918205359797	0.000995411	0.030714	-1	Nnmt	nicotinamide N-methyltransferase [Source:MGI Symbol;Acc:MGI:1099443]	protein_coding	ENSMUST00000034808,ENSMUST00000119426,ENSMUST00000126109,ENSMUST00000128076,ENSMUST00000136813	-	chr9	48591877	48605153	45.01
ENSMUSG00000028108	-0.538465	322.193309544327,0.163646410143597,-3.29041744516404	0.00100039	0.0308002	0	Ecm1	extracellular matrix protein 1 [Source:MGI Symbol;Acc:MGI:103060]	protein_coding	ENSMUST00000029753,ENSMUST00000117507,ENSMUST00000123143,ENSMUST00000128885,ENSMUST00000131376,ENSMUST00000137912,ENSMUST00000144958,ENSMUST00000147217,ENSMUST00000153026,ENSMUST00000155815	-	chr3	95734147	95739569	54.97
ENSMUSG00000024053	-0.654016	275.835475911474,0.198804773771102,-3.28974089710055	0.0010028	0.0308071	-1	Emilin2	elastin microfibril interfacer 2 [Source:MGI Symbol;Acc:MGI:2389136]	protein_coding	ENSMUST00000024849	-	chr17	71252176	71310965	47.47
ENSMUSG00000042364	-0.330608	298.310175675543,0.100573463907653,-3.2872258360063	0.0010118	0.0310063	0	Snx18	sorting nexin 18 [Source:MGI Symbol;Acc:MGI:2137642]	protein_coding	ENSMUST00000109241	-	chr13	113592180	113618564	49.19
ENSMUSG00000020330	-3.14857	14.7726827268689,0.958112314078638,-3.28622435249189	0.0010154	0.0310063	-1	Hmmr	hyaluronan mediated motility receptor (RHAMM) [Source:MGI Symbol;Acc:MGI:104667]	protein_coding	ENSMUST00000020579,ENSMUST00000127705,ENSMUST00000152749,ENSMUST00000156399	-	chr11	40701395	40733422	40.73
ENSMUSG00000030451	0.224631	1583.38595056745,0.0683581690037466,3.28609174205493	0.00101588	0.0310063	0	Herc2	HECT and RLD domain containing E3 ubiquitin protein ligase 2 [Source:MGI Symbol;Acc:MGI:103234]	protein_coding	ENSMUST00000076226,ENSMUST00000164095,ENSMUST00000205303,ENSMUST00000205653,ENSMUST00000205678,ENSMUST00000206101,ENSMUST00000206537,ENSMUST00000206990	+	chr7	56050196	56231800	40.49
ENSMUSG00000035783	-0.446084	306.357463682091,0.13584005711254,-3.28388804287812	0.00102386	0.0311823	0	Acta2	actin, alpha 2, smooth muscle, aorta [Source:MGI Symbol;Acc:MGI:87909]	protein_coding	ENSMUST00000039631	-	chr19	34241090	34255336	44.43
ENSMUSG00000021365	-0.58784	116.195895719251,0.179156159535466,-3.28115860983924	0.00103382	0.0314178	-1	Nedd9	neural precursor cell expressed, developmentally down-regulated gene 9 [Source:MGI Symbol;Acc:MGI:97302]	protein_coding	ENSMUST00000021794,ENSMUST00000163623	-	chr13	41309916	41487320	44.19
ENSMUSG00000048546	0.368549	2335.92335671126,0.112504361253045,3.2758647765216	0.00105339	0.0319438	0	Tob2	transducer of ERBB2, 2 [Source:MGI Symbol;Acc:MGI:1888525]	protein_coding	ENSMUST00000050467	-	chr15	81848270	81858326	50.5
ENSMUSG00000026950	0.284296	72185.2923785331,0.0869844782014838,3.26834881760884	0.00108177	0.032734	0	Neb	nebulin [Source:MGI Symbol;Acc:MGI:97292]	protein_coding	ENSMUST00000028320,ENSMUST00000036934,ENSMUST00000075301,ENSMUST00000127339,ENSMUST00000131236,ENSMUST00000135200,ENSMUST00000136769,ENSMUST00000137410,ENSMUST00000139672,ENSMUST00000148356,ENSMUST00000152851	-	chr2	52136647	52338798	41.49
ENSMUSG00000021796	0.186387	1782.48296739163,0.0570761096269657,3.26558470740032	0.00109238	0.0329844	0	Bmpr1a	bone morphogenetic protein receptor, type 1A [Source:MGI Symbol;Acc:MGI:1338938]	protein_coding	ENSMUST00000049005,ENSMUST00000165280,ENSMUST00000171343,ENSMUST00000171551	-	chr14	34410734	34503341	39.93
ENSMUSG00000063388	-0.438246	866.060977404263,0.134284549909783,-3.26356205836829	0.00110021	0.0331497	0	BC023105	cDNA sequence BC023105 [Source:MGI Symbol;Acc:MGI:2384767]	pseudogene	ENSMUST00000073997	+	chr18	60441753	60442983	39.89
ENSMUSG00000066687	-0.365476	989.499374085264,0.112148220757027,-3.2588691394278	0.00111857	0.0336311	0	Zbtb16	zinc finger and BTB domain containing 16 [Source:MGI Symbol;Acc:MGI:103222]	protein_coding	ENSMUST00000093852	-	chr9	48654311	48835945	48.33
ENSMUSG00000039286	-0.414219	394.907983226634,0.127361981386217,-3.25229407786069	0.00114478	0.0343457	0	Fndc3b	fibronectin type III domain containing 3B [Source:MGI Symbol;Acc:MGI:1919257]	protein_coding	ENSMUST00000046157,ENSMUST00000191684,ENSMUST00000193779,ENSMUST00000195008	-	chr3	27416162	27711307	45.51
ENSMUSG00000036242	0.780707	58.9900290130029,0.240270422599826,3.24928655675224	0.00115695	0.0345161	1	3632451O06Rik	RIKEN cDNA 3632451O06 gene [Source:MGI Symbol;Acc:MGI:1914669]	protein_coding	ENSMUST00000036972,ENSMUST00000118129,ENSMUST00000177321	-	chr14	49681560	49783383	40.23
ENSMUSG00000037242	-0.242043	1113.21065707098,0.0744996974987382,-3.24890624760265	0.0011585	0.0345161	0	Clic4	chloride intracellular channel 4 (mitochondrial) [Source:MGI Symbol;Acc:MGI:1352754]	protein_coding	ENSMUST00000037099,ENSMUST00000143370	-	chr4	135213969	135272814	45.48
ENSMUSG00000033590	0.46266	219.499643656149,0.142409619278036,3.24879885464236	0.00115893	0.0345161	0	Myo5c	myosin VC [Source:MGI Symbol;Acc:MGI:2442485]	protein_coding	ENSMUST00000036555	+	chr9	75232014	75305451	47.75
ENSMUSG00000041120	-0.429204	534.464375035721,0.132124553920361,-3.24847718898861	0.00116025	0.0345161	0	Nbl1	neuroblastoma, suppression of tumorigenicity 1 [Source:MGI Symbol;Acc:MGI:104591]	protein_coding	ENSMUST00000042844,ENSMUST00000132900,ENSMUST00000132940	-	chr4	139082284	139092993	55.26
ENSMUSG00000026480	-1.59319	64.2325973525329,0.490965431682784,-3.24502177103628	0.00117442	0.0348641	-1	Ncf2	neutrophil cytosolic factor 2 [Source:MGI Symbol;Acc:MGI:97284]	protein_coding	ENSMUST00000027754,ENSMUST00000186568,ENSMUST00000187235,ENSMUST00000187641,ENSMUST00000189135,ENSMUST00000190323	+	chr1	152800194	152836991	46.98
ENSMUSG00000022191	0.255762	756.083818445403,0.0788486945646438,3.24370086727017	0.00117988	0.0349526	0	Drosha	drosha, ribonuclease type III [Source:MGI Symbol;Acc:MGI:1261425]	protein_coding	ENSMUST00000090292,ENSMUST00000129031,ENSMUST00000141010,ENSMUST00000141706,ENSMUST00000147647,ENSMUST00000150211,ENSMUST00000156594,ENSMUST00000169061	+	chr15	12824815	12935290	44.63
ENSMUSG00000056201	-0.652916	556.670508655218,0.201348417785919,-3.2427155547289	0.00118396	0.0350001	-1	Cfl1	cofilin 1, non-muscle [Source:MGI Symbol;Acc:MGI:101757]	protein_coding	ENSMUST00000116560	+	chr19	5490485	5494029	53.88
ENSMUSG00000030830	-1.97796	19.42919883531,0.610491848323847,-3.23994076487711	0.00119555	0.0352686	-1	Itgal	integrin alpha L [Source:MGI Symbol;Acc:MGI:96606]	protein_coding	ENSMUST00000106306,ENSMUST00000117762,ENSMUST00000118405,ENSMUST00000120857,ENSMUST00000170971,ENSMUST00000205695	+	chr7	127296260	127335138	49.53
ENSMUSG00000029392	0.261709	2524.84052405253,0.0808155346007503,3.23835547745031	0.00120221	0.0353646	0	Rilpl1	Rab interacting lysosomal protein-like 1 [Source:MGI Symbol;Acc:MGI:1922945]	protein_coding	ENSMUST00000062153,ENSMUST00000199125,ENSMUST00000199766,ENSMUST00000200202	-	chr5	124493080	124531391	50.4
ENSMUSG00000031494	-0.907166	63.1355416191505,0.280164805855623,-3.23797409235627	0.00120382	0.0353646	-1	Cd209a	CD209a antigen [Source:MGI Symbol;Acc:MGI:2157942]	protein_coding	ENSMUST00000012847,ENSMUST00000207906,ENSMUST00000207979,ENSMUST00000208960	-	chr8	3743397	3748984	44.51
ENSMUSG00000062081	0.790173	123.491259551312,0.244193040879886,3.23585451493613	0.00121279	0.0355542	1	Gm6055	predicted gene 6055 [Source:MGI Symbol;Acc:MGI:3648620]	processed_pseudogene	ENSMUST00000180532	-	chr14	48079375	48079752	53.97
ENSMUSG00000040964	0.276184	827.847557102052,0.0853945955942871,3.23420366530036	0.00121982	0.035626	0	Arhgef10l	Rho guanine nucleotide exchange factor (GEF) 10-like [Source:MGI Symbol;Acc:MGI:1920004]	protein_coding	ENSMUST00000039204,ENSMUST00000069623,ENSMUST00000097820,ENSMUST00000105797,ENSMUST00000105798,ENSMUST00000105799,ENSMUST00000125045,ENSMUST00000138493,ENSMUST00000140403,ENSMUST00000143614,ENSMUST00000147426,ENSMUST00000154979	-	chr4	140514485	140666012	52.95
ENSMUSG00000002409	0.315665	524.835501608524,0.0976395285202843,3.23296063521967	0.00122514	0.035626	0	Dyrk1b	dual-specificity tyrosine-(Y)-phosphorylation regulated kinase 1b [Source:MGI Symbol;Acc:MGI:1330302]	protein_coding	ENSMUST00000085901,ENSMUST00000172467,ENSMUST00000172761	+	chr7	28179469	28187294	58.19
ENSMUSG00000028581	-0.79656	213.40680056621,0.246389946983622,-3.23292244737034	0.00122531	0.035626	-1	Laptm5	lysosomal-associated protein transmembrane 5 [Source:MGI Symbol;Acc:MGI:108046]	protein_coding	ENSMUST00000030316,ENSMUST00000123550,ENSMUST00000125332,ENSMUST00000136082,ENSMUST00000139023,ENSMUST00000143450,ENSMUST00000151698,ENSMUST00000156170,ENSMUST00000156225,ENSMUST00000156742	+	chr4	130913125	130936141	53.09
ENSMUSG00000017057	-0.661931	128.337247362155,0.20474747648809,-3.23291336675285	0.00122535	0.035626	-1	Il13ra1	interleukin 13 receptor, alpha 1 [Source:MGI Symbol;Acc:MGI:105052]	protein_coding	ENSMUST00000033418	+	chrX	36112110	36171259	39.87
ENSMUSG00000041697	-0.4513	206.212442603344,0.139646580323882,-3.23172724610888	0.00123044	0.0357006	0	Cox6a1	cytochrome c oxidase subunit VIa polypeptide 1 [Source:MGI Symbol;Acc:MGI:103099]	protein_coding	ENSMUST00000040154,ENSMUST00000137766	-	chr5	115345642	115348981	50
ENSMUSG00000050071	0.417618	224.440854969178,0.129291563309851,3.23004858402509	0.00123769	0.0358372	0	Bex1	brain expressed gene 1 [Source:MGI Symbol;Acc:MGI:1328321]	protein_coding	ENSMUST00000058125,ENSMUST00000113118,ENSMUST00000113120,ENSMUST00000142172	-	chrX	136213972	136215513	58.17
ENSMUSG00000024810	-0.73293	233.629002337273,0.227377561851639,-3.22340364821673	0.00126677	0.0366039	-1	Il33	interleukin 33 [Source:MGI Symbol;Acc:MGI:1924375]	protein_coding	ENSMUST00000025724,ENSMUST00000120388,ENSMUST00000136850,ENSMUST00000144528,ENSMUST00000177518	+	chr19	29925114	29960718	42.14
ENSMUSG00000038949	0.240431	784.470830604159,0.074671128568807,3.21986546729179	0.00128251	0.0369829	0	Cnst	consortin, connexin sorting protein [Source:MGI Symbol;Acc:MGI:2445141]	protein_coding	ENSMUST00000040706,ENSMUST00000143270,ENSMUST00000144370,ENSMUST00000153962	+	chr1	179546370	179627478	45.16
ENSMUSG00000032434	-0.388121	246.719390733022,0.120665177836451,-3.2165113353636	0.00129759	0.0373416	0	Cmtm6	CKLF-like MARVEL transmembrane domain containing 6 [Source:MGI Symbol;Acc:MGI:2447165]	protein_coding	ENSMUST00000035007	+	chr9	114731203	114749343	47.17
ENSMUSG00000039168	-0.536147	133.929481980466,0.166914299148994,-3.21210790544864	0.00131765	0.0378376	0	Dap	death-associated protein [Source:MGI Symbol;Acc:MGI:1918190]	protein_coding	ENSMUST00000044524,ENSMUST00000185618,ENSMUST00000186109,ENSMUST00000186425,ENSMUST00000186547	+	chr15	31224314	31274341	49.6
ENSMUSG00000025216	0.293997	646.003590643915,0.0915434642519601,3.2115527953216	0.0013202	0.0378376	0	Lbx1	ladybird homeobox homolog 1 (Drosophila) [Source:MGI Symbol;Acc:MGI:104867]	protein_coding	ENSMUST00000099401	-	chr19	45232684	45235812	60.37
ENSMUSG00000039105	0.261128	2310.83668805846,0.0813502859971899,3.20991659651634	0.00132773	0.0379765	0	Atp6v1g1	ATPase, H+ transporting, lysosomal V1 subunit G1 [Source:MGI Symbol;Acc:MGI:1913540]	protein_coding	ENSMUST00000035301	+	chr4	63544772	63550750	46.55
ENSMUSG00000033420	-0.505451	403.518472501399,0.157669422956847,-3.20576191722523	0.00134705	0.038451	0	Antxr1	anthrax toxin receptor 1 [Source:MGI Symbol;Acc:MGI:1916788]	protein_coding	ENSMUST00000042025,ENSMUST00000203131,ENSMUST00000203563,ENSMUST00000204805,ENSMUST00000205033,ENSMUST00000205089	-	chr6	87133853	87335821	46.88
ENSMUSG00000023809	0.189928	2615.45781440361,0.0592742434807957,3.20422795030047	0.00135425	0.0385784	0	Rps6ka2	ribosomal protein S6 kinase, polypeptide 2 [Source:MGI Symbol;Acc:MGI:1342290]	protein_coding	ENSMUST00000024575	+	chr17	7170115	7303313	48.88
ENSMUSG00000060843	0.388315	229.253693283508,0.12139693308671,3.1987181554671	0.0013804	0.039244	0	Ctnna3	catenin (cadherin associated protein), alpha 3 [Source:MGI Symbol;Acc:MGI:2661445]	protein_coding	ENSMUST00000075099,ENSMUST00000105440,ENSMUST00000105441,ENSMUST00000133190,ENSMUST00000135474	+	chr10	63430098	65003667	39.39
ENSMUSG00000022358	0.440499	5927.18155611789,0.137757856901904,3.19763410093471	0.0013856	0.0393126	0	Fbxo32	F-box protein 32 [Source:MGI Symbol;Acc:MGI:1914981]	protein_coding	ENSMUST00000022986	-	chr15	58175879	58214892	45.35
ENSMUSG00000062526	-1.34381	30.4586491788464,0.420494419935001,-3.19577477224335	0.00139456	0.0394873	-1	Mppe1	metallophosphoesterase 1 [Source:MGI Symbol;Acc:MGI:2661311]	protein_coding	ENSMUST00000073054	-	chr18	67225530	67245830	45.95
ENSMUSG00000048373	0.394633	199.958222895035,0.123669124459281,3.1910375765267	0.00141763	0.0400246	0	Fgfbp1	fibroblast growth factor binding protein 1 [Source:MGI Symbol;Acc:MGI:1096350]	protein_coding	ENSMUST00000061299,ENSMUST00000199481,ENSMUST00000199894	-	chr5	43978858	43981779	46.51
ENSMUSG00000030798	-1.56555	25.4360557920292,0.490677692281757,-3.19058103104683	0.00141987	0.0400246	-1	Cd37	CD37 antigen [Source:MGI Symbol;Acc:MGI:88330]	protein_coding	ENSMUST00000098461	-	chr7	45233632	45238839	54.34
ENSMUSG00000035357	0.200884	1854.33984668942,0.0629702304372666,3.19013758272384	0.00142205	0.0400246	0	Pdzrn3	PDZ domain containing RING finger 3 [Source:MGI Symbol;Acc:MGI:1933157]	protein_coding	ENSMUST00000075994,ENSMUST00000124884,ENSMUST00000144505,ENSMUST00000151175	-	chr6	101149609	101377897	44.79
ENSMUSG00000024610	-0.420123	1528.65352930527,0.13182191034137,-3.18704647224174	0.00143734	0.0403203	0	Cd74	CD74 antigen (invariant polypeptide of major histocompatibility complex, class II antigen-associated) [Source:MGI Symbol;Acc:MGI:96534]	protein_coding	ENSMUST00000050487,ENSMUST00000097563,ENSMUST00000167610	+	chr18	60803848	60812646	50.8
ENSMUSG00000021768	0.246005	1241.60199855283,0.0772166590316913,3.18590477361314	0.00144302	0.0403203	0	Dusp13	dual specificity phosphatase 13 [Source:MGI Symbol;Acc:MGI:1351599]	protein_coding	ENSMUST00000075040,ENSMUST00000119866,ENSMUST00000120956,ENSMUST00000120984,ENSMUST00000127051,ENSMUST00000127851,ENSMUST00000153071,ENSMUST00000183698,ENSMUST00000183824,ENSMUST00000183893,ENSMUST00000183943,ENSMUST00000184571,ENSMUST00000184703,ENSMUST00000185042	-	chr14	21733394	21751181	49.29
ENSMUSG00000029528	0.208114	1018.65535018235,0.0653273292754715,3.1857155432733	0.00144396	0.0403203	0	Pxn	paxillin [Source:MGI Symbol;Acc:MGI:108295]	protein_coding	ENSMUST00000067268,ENSMUST00000086523,ENSMUST00000125007,ENSMUST00000125054,ENSMUST00000129897,ENSMUST00000134198,ENSMUST00000137716,ENSMUST00000138139,ENSMUST00000139834,ENSMUST00000152156,ENSMUST00000153682,ENSMUST00000157050,ENSMUST00000202564	+	chr5	115506676	115555987	54.06
ENSMUSG00000031962	0.377259	259.927182427837,0.118422217622655,3.18570980813421	0.00144399	0.0403203	0	Cdh15	cadherin 15 [Source:MGI Symbol;Acc:MGI:106672]	protein_coding	ENSMUST00000034443	+	chr8	122848374	122867397	54.22
ENSMUSG00000004612	-6.33216	12.7828754357294,1.98825903816068,-3.18477676873199	0.00144866	0.0403706	-1	Nkg7	natural killer cell group 7 sequence [Source:MGI Symbol;Acc:MGI:1931250]	protein_coding	ENSMUST00000070518,ENSMUST00000206251,ENSMUST00000206741	+	chr7	43437073	43438249	54.46
ENSMUSG00000027487	0.560818	142.860525537817,0.176159839099596,3.18357707990524	0.00145467	0.0404583	0	Cdk5rap1	CDK5 regulatory subunit associated protein 1 [Source:MGI Symbol;Acc:MGI:1914221]	protein_coding	ENSMUST00000028990,ENSMUST00000109730,ENSMUST00000109731,ENSMUST00000137918,ENSMUST00000148289,ENSMUST00000150308,ENSMUST00000152180	-	chr2	154335380	154373010	42.78
ENSMUSG00000071748	0.341098	1855.21652748245,0.107210977813627,3.18155561385485	0.00146486	0.0406615	0	Gm14698	predicted gene 14698 [Source:MGI Symbol;Acc:MGI:3709613]	protein_coding	ENSMUST00000096420	+	chrX	68821093	68825318	37.27
ENSMUSG00000018920	-0.829509	37.6730066877645,0.261003291814918,-3.17815493668975	0.00148216	0.0410191	-1	Cxcl16	chemokine (C-X-C motif) ligand 16 [Source:MGI Symbol;Acc:MGI:1932682]	protein_coding	ENSMUST00000019064,ENSMUST00000126391,ENSMUST00000154475	-	chr11	70453983	70459984	47.42
ENSMUSG00000039007	-0.389595	283.492590242742,0.122595818749006,-3.17787966137693	0.00148356	0.0410191	0	Cpq	carboxypeptidase Q [Source:MGI Symbol;Acc:MGI:1889205]	protein_coding	ENSMUST00000042167	+	chr15	33083129	33594552	38.92
ENSMUSG00000033066	-0.564657	355.142584881273,0.177816904976011,-3.17549422607451	0.00149581	0.0412769	0	Gas7	growth arrest specific 7 [Source:MGI Symbol;Acc:MGI:1202388]	protein_coding	ENSMUST00000041611,ENSMUST00000108680,ENSMUST00000108681,ENSMUST00000108682,ENSMUST00000129801,ENSMUST00000133367,ENSMUST00000136796,ENSMUST00000140863,ENSMUST00000145496,ENSMUST00000147276,ENSMUST00000151784	+	chr11	67455437	67688990	47.37
ENSMUSG00000039976	0.210025	849.767270309004,0.0661663069019415,3.17419181463971	0.00150254	0.0413816	0	Tbc1d16	TBC1 domain family, member 16 [Source:MGI Symbol;Acc:MGI:2652878]	protein_coding	ENSMUST00000036113,ENSMUST00000125856,ENSMUST00000207655	-	chr11	119143045	119228499	52.03
ENSMUSG00000025579	0.210751	3621.93320742827,0.066445620836836,3.17177758394992	0.00151509	0.0416333	0	Gaa	glucosidase, alpha, acid [Source:MGI Symbol;Acc:MGI:95609]	protein_coding	ENSMUST00000026666,ENSMUST00000106258,ENSMUST00000106259,ENSMUST00000128753,ENSMUST00000132706,ENSMUST00000138510,ENSMUST00000143288,ENSMUST00000150562	+	chr11	119267887	119285454	55.42
ENSMUSG00000009291	-0.355236	476.50637604084,0.112022361983022,-3.17111975463006	0.00151853	0.0416333	0	Pttg1ip	pituitary tumor-transforming 1 interacting protein [Source:MGI Symbol;Acc:MGI:2652132]	protein_coding	ENSMUST00000009435,ENSMUST00000159116,ENSMUST00000161165,ENSMUST00000161789,ENSMUST00000162429,ENSMUST00000162598,ENSMUST00000162895,ENSMUST00000162943,ENSMUST00000167006	+	chr10	77581720	77598732	50.02
ENSMUSG00000021025	0.305206	432.68302933297,0.0962687826519964,3.17035247031805	0.00152254	0.0416333	0	Nfkbia	nuclear factor of kappa light polypeptide gene enhancer in B cells inhibitor, alpha [Source:MGI Symbol;Acc:MGI:104741]	protein_coding	ENSMUST00000021413	-	chr12	55489411	55492647	54.37
ENSMUSG00000027777	0.26467	948.861977316433,0.0834874737243457,3.17017069566468	0.00152349	0.0416333	0	Schip1	schwannomin interacting protein 1 [Source:MGI Symbol;Acc:MGI:1353557]	protein_coding	ENSMUST00000029346,ENSMUST00000169909,ENSMUST00000170788,ENSMUST00000182360,ENSMUST00000182532,ENSMUST00000182719,ENSMUST00000182997,ENSMUST00000192555	+	chr3	68064802	68626481	41.69
ENSMUSG00000032232	-0.563865	195.960184130771,0.178072942473492,-3.16648354923031	0.00154294	0.0420832	0	Cgnl1	cingulin-like 1 [Source:MGI Symbol;Acc:MGI:1915428]	protein_coding	ENSMUST00000072899,ENSMUST00000121322,ENSMUST00000122065,ENSMUST00000136044,ENSMUST00000146567,ENSMUST00000152224	-	chr9	71626509	71771602	46.89
ENSMUSG00000031885	0.238181	2890.30099851396,0.0752789210672582,3.16398021167731	0.00155627	0.0423649	0	Cbfb	core binding factor beta [Source:MGI Symbol;Acc:MGI:99851]	protein_coding	ENSMUST00000052209,ENSMUST00000109392,ENSMUST00000109394,ENSMUST00000109395,ENSMUST00000186070,ENSMUST00000187323,ENSMUST00000190915	+	chr8	105170674	105217989	40.23
ENSMUSG00000008658	0.183432	4115.21691680584,0.0580145254092701,3.16182321641657	0.00156785	0.0425977	0	Rbfox1	RNA binding protein, fox-1 homolog (C. elegans) 1 [Source:MGI Symbol;Acc:MGI:1926224]	protein_coding	ENSMUST00000056416,ENSMUST00000115841	+	chr16	6809222	7412479	41.92
ENSMUSG00000040740	0.906714	191.545582820849,0.286945858195176,3.15987982181897	0.00157834	0.0428004	1	Slc25a34	solute carrier family 25, member 34 [Source:MGI Symbol;Acc:MGI:2686215]	protein_coding	ENSMUST00000038661	-	chr4	141618824	141623821	55.16
ENSMUSG00000037206	-0.413114	556.238524124904,0.130853125313246,-3.15708035189488	0.00159357	0.0431305	0	Islr	immunoglobulin superfamily containing leucine-rich repeat [Source:MGI Symbol;Acc:MGI:1349645]	protein_coding	ENSMUST00000041477,ENSMUST00000168864	-	chr9	58156265	58159221	56.07
ENSMUSG00000026153	0.367891	413.357588739216,0.116573223959275,3.15587639225184	0.00160017	0.043226	0	Fam135a	family with sequence similarity 135, member A [Source:MGI Symbol;Acc:MGI:1915437]	protein_coding	ENSMUST00000027337,ENSMUST00000185525,ENSMUST00000185807,ENSMUST00000186331,ENSMUST00000186999,ENSMUST00000187369,ENSMUST00000187619,ENSMUST00000187752,ENSMUST00000188712	-	chr1	24011093	24100341	38.35
ENSMUSG00000048163	-1.39359	50.3012667279501,0.442079128400066,-3.15234739707479	0.00161963	0.0436682	-1	Selplg	selectin, platelet (p-selectin) ligand [Source:MGI Symbol;Acc:MGI:106689]	protein_coding	ENSMUST00000100874,ENSMUST00000198891,ENSMUST00000199109,ENSMUST00000201194,ENSMUST00000201931,ENSMUST00000202555	-	chr5	113818536	113832644	50.32
ENSMUSG00000062077	0.183099	3331.38980208366,0.0581053198876063,3.15115658692163	0.00162625	0.043763	0	Trim54	tripartite motif-containing 54 [Source:MGI Symbol;Acc:MGI:1889623]	protein_coding	ENSMUST00000013771,ENSMUST00000202769	+	chr5	31116712	31137630	47.48
ENSMUSG00000028497	-0.61836	98.150580890034,0.196268445062946,-3.15058162997299	0.00162946	0.0437657	-1	Hacd4	3-hydroxyacyl-CoA dehydratase 4 [Source:MGI Symbol;Acc:MGI:1914025]	protein_coding	ENSMUST00000030221,ENSMUST00000132493,ENSMUST00000151280	-	chr4	88396144	88438928	40.13
ENSMUSG00000036896	-0.564357	281.414639573692,0.17921678422868,-3.14901669809698	0.00163821	0.0439171	0	C1qc	complement component 1, q subcomponent, C chain [Source:MGI Symbol;Acc:MGI:88225]	protein_coding	ENSMUST00000046332,ENSMUST00000153104	-	chr4	136889804	136893065	55.12
ENSMUSG00000040287	0.144062	3334.91018817854,0.0457707261878867,3.14747939161125	0.00164685	0.0440388	0	Stac3	SH3 and cysteine rich domain 3 [Source:MGI Symbol;Acc:MGI:3606571]	protein_coding	ENSMUST00000035839,ENSMUST00000160019,ENSMUST00000160610,ENSMUST00000160760,ENSMUST00000162302	+	chr10	127501686	127508823	51.63
ENSMUSG00000036528	0.489588	154.214175675585,0.155567958356161,3.14709843492384	0.00164899	0.0440388	0	Ppfibp2	PTPRF interacting protein, binding protein 2 (liprin beta 2) [Source:MGI Symbol;Acc:MGI:894649]	protein_coding	ENSMUST00000040056,ENSMUST00000098134,ENSMUST00000207852,ENSMUST00000208159,ENSMUST00000208504,ENSMUST00000208956	+	chr7	107595207	107748583	45
ENSMUSG00000032290	-0.456872	129.962781322839,0.145201490854824,-3.14646637098369	0.00165256	0.0440506	0	Ptpn9	protein tyrosine phosphatase, non-receptor type 9 [Source:MGI Symbol;Acc:MGI:1928376]	protein_coding	ENSMUST00000034832	+	chr9	56994968	57062805	41.69
ENSMUSG00000073902	-1.63337	28.8944854814167,0.51958567030402,-3.14359904609984	0.00166884	0.0443272	-1	Gm1966	predicted gene 1966 [Source:MGI Symbol;Acc:MGI:3584360]	unprocessed_pseudogene	ENSMUST00000184540	-	chr7	106596743	106604035	41.48
ENSMUSG00000029064	-0.317662	853.90950671221,0.101052628116004,-3.14353165904303	0.00166922	0.0443272	0	Gnb1	guanine nucleotide binding protein (G protein), beta 1 [Source:MGI Symbol;Acc:MGI:95781]	protein_coding	ENSMUST00000030940,ENSMUST00000105616,ENSMUST00000165335,ENSMUST00000175688,ENSMUST00000175705,ENSMUST00000176308,ENSMUST00000176411,ENSMUST00000176637,ENSMUST00000177094	+	chr4	155491361	155559269	42.48
ENSMUSG00000020142	-1.1237	20.0429300824592,0.357549250782954,-3.14279494674666	0.00167343	0.0443553	-1	Slc1a4	solute carrier family 1 (glutamate/neutral amino acid transporter), member 4 [Source:MGI Symbol;Acc:MGI:2135601]	protein_coding	ENSMUST00000004634,ENSMUST00000109594	-	chr11	20302180	20332713	46.5
ENSMUSG00000021770	0.252531	1527.35513825403,0.0804066856910972,3.1406717619099	0.00168561	0.0445943	0	Samd8	sterile alpha motif domain containing 8 [Source:MGI Symbol;Acc:MGI:1914880]	protein_coding	ENSMUST00000022292,ENSMUST00000119430,ENSMUST00000142023,ENSMUST00000144061	+	chr14	21750531	21798725	42.12
ENSMUSG00000036352	0.176497	2276.65552711922,0.0562346662211082,3.13857960317571	0.00169769	0.0447856	0	Ubac1	ubiquitin associated domain containing 1 [Source:MGI Symbol;Acc:MGI:1920995]	protein_coding	ENSMUST00000036509,ENSMUST00000123275,ENSMUST00000134990,ENSMUST00000136750,ENSMUST00000146363,ENSMUST00000146898,ENSMUST00000148725,ENSMUST00000150608,ENSMUST00000154336	-	chr2	25998543	26021747	47.15
ENSMUSG00000032265	-0.628568	192.507065795436,0.200287922986559,-3.13832013272587	0.00169919	0.0447856	-1	Fam46a	family with sequence similarity 46, member A [Source:MGI Symbol;Acc:MGI:2670964]	protein_coding	ENSMUST00000034802,ENSMUST00000187711	-	chr9	85320439	85327348	44.36
ENSMUSG00000022992	0.237882	811.206713451235,0.0758512180236146,3.1361640037593	0.00171173	0.045032	0	Kansl2	KAT8 regulatory NSL complex subunit 2 [Source:MGI Symbol;Acc:MGI:1916862]	protein_coding	ENSMUST00000023727,ENSMUST00000116400	-	chr15	98518821	98534244	44.79
ENSMUSG00000022346	-1.07561	118.037470420232,0.343077482277845,-3.13517110696176	0.00171754	0.0450933	-1	Myc	myelocytomatosis oncogene [Source:MGI Symbol;Acc:MGI:97250]	protein_coding	ENSMUST00000022971,ENSMUST00000159327,ENSMUST00000159338,ENSMUST00000160009,ENSMUST00000161976,ENSMUST00000167731,ENSMUST00000188482,ENSMUST00000191178	+	chr15	61985341	61990374	53.18
ENSMUSG00000026683	-3.88315	10.8830954893591,1.2388192306698,-3.13455932265106	0.00172112	0.0450933	-1	Nuf2	NUF2, NDC80 kinetochore complex component, homolog (S. cerevisiae) [Source:MGI Symbol;Acc:MGI:1914227]	protein_coding	ENSMUST00000028000,ENSMUST00000111368,ENSMUST00000192248,ENSMUST00000194831,ENSMUST00000195342	-	chr1	169497934	169531464	42.47
ENSMUSG00000020614	-1.06474	29.7776656908922,0.339748732844251,-3.13390399420404	0.00172497	0.0450933	-1	Fam20a	family with sequence similarity 20, member A [Source:MGI Symbol;Acc:MGI:2388266]	protein_coding	ENSMUST00000020938,ENSMUST00000144972,ENSMUST00000146408,ENSMUST00000155559	-	chr11	109669749	109722279	46.51
ENSMUSG00000016319	-0.60412	661.445133016259,0.192788684693316,-3.13358416511405	0.00172685	0.0450933	-1	Slc25a5	solute carrier family 25 (mitochondrial carrier, adenine nucleotide translocator), member 5 [Source:MGI Symbol;Acc:MGI:1353496]	protein_coding	ENSMUST00000016463,ENSMUST00000126608,ENSMUST00000156672	+	chrX	36795651	36798807	50.3
ENSMUSG00000030091	0.42316	491.719436976102,0.135346641303801,3.12649306201326	0.00176905	0.0461097	0	Nup210	nucleoporin 210 [Source:MGI Symbol;Acc:MGI:1859555]	protein_coding	ENSMUST00000032179,ENSMUST00000113509,ENSMUST00000123340,ENSMUST00000139051,ENSMUST00000141952,ENSMUST00000142951,ENSMUST00000148397,ENSMUST00000151437,ENSMUST00000153350,ENSMUST00000203434,ENSMUST00000204740	-	chr6	91013068	91116829	48.69
ENSMUSG00000028656	-0.435937	443.305674852286,0.139477012589991,-3.12551408519913	0.00177495	0.0461781	0	Cap1	CAP, adenylate cyclase-associated protein 1 (yeast) [Source:MGI Symbol;Acc:MGI:88262]	protein_coding	ENSMUST00000069533,ENSMUST00000106255,ENSMUST00000106257,ENSMUST00000128485,ENSMUST00000140783,ENSMUST00000150919,ENSMUST00000151041	-	chr4	122859047	122886056	43.52
ENSMUSG00000001864	-0.661927	97.202746116194,0.211826134319426,-3.12486120514686	0.00177889	0.0461954	-1	Aif1l	allograft inflammatory factor 1-like [Source:MGI Symbol;Acc:MGI:1919598]	protein_coding	ENSMUST00000001920,ENSMUST00000125457,ENSMUST00000128271,ENSMUST00000138833,ENSMUST00000140649,ENSMUST00000145137,ENSMUST00000148056,ENSMUST00000151276,ENSMUST00000156564,ENSMUST00000156743	+	chr2	31950139	31973442	52.11
ENSMUSG00000038127	-0.19434	3266.81577100082,0.0622943002724715,-3.11970824388269	0.0018103	0.0469248	0	Ccdc50	coiled-coil domain containing 50 [Source:MGI Symbol;Acc:MGI:1914751]	protein_coding	ENSMUST00000039443,ENSMUST00000096127,ENSMUST00000100026,ENSMUST00000143823,ENSMUST00000149077	+	chr16	27388869	27452218	39.92
ENSMUSG00000025780	-0.39362	1127.32779611576,0.126211591320151,-3.11873452553892	0.0018163	0.0469756	0	Itih5	inter-alpha (globulin) inhibitor H5 [Source:MGI Symbol;Acc:MGI:1925751]	protein_coding	ENSMUST00000026886	+	chr2	10153571	10256529	44.01
ENSMUSG00000020143	-1.09771	70.9576975854425,0.352096159452588,-3.11763276766036	0.0018231	0.0469756	-1	Dock2	dedicator of cyto-kinesis 2 [Source:MGI Symbol;Acc:MGI:2149010]	protein_coding	ENSMUST00000093193,ENSMUST00000101364,ENSMUST00000101365,ENSMUST00000127846,ENSMUST00000143540,ENSMUST00000154178,ENSMUST00000157036	-	chr11	34226815	34783892	44.49
ENSMUSG00000053205	0.691339	104.394592426629,0.221769543879609,3.11737379773953	0.0018247	0.0469756	1	Styx	serine/threonine/tyrosine interaction protein [Source:MGI Symbol;Acc:MGI:1891150]	protein_coding	ENSMUST00000111835	+	chr14	45351473	45373585	40.3
ENSMUSG00000030826	0.325888	582.011594802226,0.104544194491778,3.11723000775576	0.00182559	0.0469756	0	Bcat2	branched chain aminotransferase 2, mitochondrial [Source:MGI Symbol;Acc:MGI:1276534]	protein_coding	ENSMUST00000033098	+	chr7	45570153	45589699	48.49
ENSMUSG00000034621	0.281249	551.642968940662,0.0902598779427646,3.11599553687431	0.00183325	0.0470255	0	Gpatch8	G patch domain containing 8 [Source:MGI Symbol;Acc:MGI:1918667]	protein_coding	ENSMUST00000069673,ENSMUST00000125754,ENSMUST00000126804,ENSMUST00000127018,ENSMUST00000131573,ENSMUST00000143842	-	chr11	102475915	102556392	41.47
ENSMUSG00000021417	0.255758	687.554934954022,0.0820831564304059,3.11584327904255	0.0018342	0.0470255	0	Eci2	enoyl-Coenzyme A delta isomerase 2 [Source:MGI Symbol;Acc:MGI:1346064]	protein_coding	ENSMUST00000021854,ENSMUST00000084345,ENSMUST00000110251,ENSMUST00000163280,ENSMUST00000164421,ENSMUST00000166109,ENSMUST00000167036,ENSMUST00000169759,ENSMUST00000170538,ENSMUST00000170989,ENSMUST00000171229,ENSMUST00000171258,ENSMUST00000178421	-	chr13	34977748	35027094	43.81
ENSMUSG00000041870	-0.508833	282.183010053168,0.163452313737402,-3.11303830538879	0.00185172	0.0473886	0	Ankrd13a	ankyrin repeat domain 13a [Source:MGI Symbol;Acc:MGI:1915670]	protein_coding	ENSMUST00000102578,ENSMUST00000129001,ENSMUST00000131803,ENSMUST00000137519,ENSMUST00000140604,ENSMUST00000200704	+	chr5	114774677	114806200	50.69
ENSMUSG00000029763	0.181826	1232.21794909855,0.0584318542069951,3.11175966233232	0.00185976	0.0475081	0	Exoc4	exocyst complex component 4 [Source:MGI Symbol;Acc:MGI:1096376]	protein_coding	ENSMUST00000052266,ENSMUST00000090381,ENSMUST00000115080,ENSMUST00000132842,ENSMUST00000134653,ENSMUST00000137043,ENSMUST00000139132,ENSMUST00000143190,ENSMUST00000152835,ENSMUST00000156207	+	chr6	33249085	33973979	39.71
ENSMUSG00000026712	-0.451743	472.956512689031,0.145262439347593,-3.10983918015098	0.00187189	0.0477316	0	Mrc1	mannose receptor, C type 1 [Source:MGI Symbol;Acc:MGI:97142]	protein_coding	ENSMUST00000028045,ENSMUST00000146168	+	chr2	14229392	14332057	40.1
ENSMUSG00000019189	-0.460745	191.795446602988,0.148232982120293,-3.10824733959355	0.001882	0.0479028	0	Rnf145	ring finger protein 145 [Source:MGI Symbol;Acc:MGI:1921565]	protein_coding	ENSMUST00000019333,ENSMUST00000101327,ENSMUST00000124959,ENSMUST00000127907,ENSMUST00000129676,ENSMUST00000150257	+	chr11	44518964	44565520	45.24
ENSMUSG00000071637	0.520186	304.121137694467,0.16752009871099,3.10521265030187	0.00190142	0.0483098	0	Cebpd	CCAAT/enhancer binding protein (C/EBP), delta [Source:MGI Symbol;Acc:MGI:103573]	pseudogene	ENSMUST00000096232	+	chr16	15887286	15888466	62.91
ENSMUSG00000039081	0.346927	388.103910926839,0.111767115750469,3.10401479373103	0.00190914	0.0483972	0	Zfp503	zinc finger protein 503 [Source:MGI Symbol;Acc:MGI:1353644]	protein_coding	ENSMUST00000043409	-	chr14	21983962	21989601	57.41
ENSMUSG00000028378	-1.90715	45.2410738462078,0.614592743523243,-3.10310653405604	0.00191501	0.0483972	-1	Ptgr1	prostaglandin reductase 1 [Source:MGI Symbol;Acc:MGI:1914353]	protein_coding	ENSMUST00000030069	-	chr4	58965439	58987119	44.16
ENSMUSG00000022876	-2.25717	14.2313754729085,0.7273967556467,-3.10308333952956	0.00191516	0.0483972	-1	Samsn1	SAM domain, SH3 domain and nuclear localization signals, 1 [Source:MGI Symbol;Acc:MGI:1914992]	protein_coding	ENSMUST00000114239,ENSMUST00000114240,ENSMUST00000139691,ENSMUST00000147447,ENSMUST00000150248	-	chr16	75858793	76022270	38.37
ENSMUSG00000017210	0.22797	671.074753672154,0.0735174152353495,3.1009004472601	0.00192933	0.0486682	0	Med24	mediator complex subunit 24 [Source:MGI Symbol;Acc:MGI:1344385]	protein_coding	ENSMUST00000017354,ENSMUST00000100500,ENSMUST00000124371,ENSMUST00000125064,ENSMUST00000126565,ENSMUST00000137328,ENSMUST00000138750,ENSMUST00000139849,ENSMUST00000141566,ENSMUST00000144048,ENSMUST00000144720,ENSMUST00000156378	-	chr11	98704591	98729435	51.32
ENSMUSG00000082062	-1.98416	22.8697746935893,0.640115495996047,-3.09968712407628	0.00193725	0.0487515	-1	Ftl2-ps	ferritin light polypeptide 2, pseudogene [Source:MGI Symbol;Acc:MGI:95590]	processed_pseudogene	ENSMUST00000118517	+	chr4	125504288	125504839	58.7
ENSMUSG00000031495	-0.774596	54.140571168922,0.249946491261579,-3.09904601010904	0.00194145	0.0487515	-1	Cd209d	CD209d antigen [Source:MGI Symbol;Acc:MGI:2157947]	protein_coding	ENSMUST00000011445,ENSMUST00000209176	-	chr8	3871824	3878555	44.96
ENSMUSG00000027782	0.154668	3863.21205912632,0.0499122523845261,3.09880799863529	0.00194301	0.0487515	0	Kpna4	karyopherin (importin) alpha 4 [Source:MGI Symbol;Acc:MGI:1100848]	protein_coding	ENSMUST00000029353,ENSMUST00000127497,ENSMUST00000194558	-	chr3	69067149	69127113	37.04
ENSMUSG00000028518	0.131924	6767.31421604795,0.042610820214097,3.0960145707022	0.00196141	0.0491258	0	Prkaa2	protein kinase, AMP-activated, alpha 2 catalytic subunit [Source:MGI Symbol;Acc:MGI:1336173]	protein_coding	ENSMUST00000030243	-	chr4	105029874	105109890	40.58
ENSMUSG00000026773	0.495494	4326.87482472388,0.160096487006275,3.09496922515203	0.00196833	0.0492118	0	Pfkfb3	6-phosphofructo-2-kinase/fructose-2,6-biphosphatase 3 [Source:MGI Symbol;Acc:MGI:2181202]	protein_coding	ENSMUST00000028114,ENSMUST00000049849,ENSMUST00000100411,ENSMUST00000114844,ENSMUST00000114845,ENSMUST00000114846,ENSMUST00000140580,ENSMUST00000144921,ENSMUST00000145970,ENSMUST00000150086,ENSMUST00000155167,ENSMUST00000170196,ENSMUST00000171188,ENSMUST00000179584,ENSMUST00000183869,ENSMUST00000191668,ENSMUST00000191726,ENSMUST00000192827,ENSMUST00000192844,ENSMUST00000192949,ENSMUST00000195779	-	chr2	11471433	11554077	47.33
ENSMUSG00000019082	0.688658	141.963021231851,0.22265726174023,3.09290691093487	0.00198206	0.0494674	1	Slc25a22	solute carrier family 25 (mitochondrial carrier, glutamate), member 22 [Source:MGI Symbol;Acc:MGI:1915517]	protein_coding	ENSMUST00000019226,ENSMUST00000106006,ENSMUST00000106007,ENSMUST00000124266,ENSMUST00000132635,ENSMUST00000133021,ENSMUST00000133206,ENSMUST00000136354,ENSMUST00000138865,ENSMUST00000140602,ENSMUST00000144174,ENSMUST00000148100,ENSMUST00000150026,ENSMUST00000153190,ENSMUST00000156002,ENSMUST00000172654,ENSMUST00000174095,ENSMUST00000184518,ENSMUST00000201072,ENSMUST00000201127,ENSMUST00000201558,…	-	chr7	141429744	141437892	57.01
ENSMUSG00000002319	0.25595	686.722268799796,0.082838799571268,3.08973934230323	0.00200332	0.0496748	0	Ipo4	importin 4 [Source:MGI Symbol;Acc:MGI:1923001]	protein_coding	ENSMUST00000047131,ENSMUST00000125133,ENSMUST00000126064,ENSMUST00000127773,ENSMUST00000135221,ENSMUST00000141499,ENSMUST00000141848,ENSMUST00000146528,ENSMUST00000148351,ENSMUST00000148942,ENSMUST00000150951,ENSMUST00000155464,ENSMUST00000156420	-	chr14	55625400	55637895	52.77
ENSMUSG00000030255	0.186679	1308.66616809572,0.0604259099400805,3.08939084997802	0.00200567	0.0496748	0	Sspn	sarcospan [Source:MGI Symbol;Acc:MGI:1353511]	protein_coding	ENSMUST00000032383,ENSMUST00000111701,ENSMUST00000111702	+	chr6	145931641	145965223	45.55
ENSMUSG00000042010	0.277643	4639.8710765661,0.089870368332827,3.08937202895889	0.0020058	0.0496748	0	Acacb	acetyl-Coenzyme A carboxylase beta [Source:MGI Symbol;Acc:MGI:2140940]	protein_coding	ENSMUST00000031583,ENSMUST00000102582,ENSMUST00000142489,ENSMUST00000143276,ENSMUST00000146841	+	chr5	114146535	114250761	50.07
ENSMUSG00000028328	0.177766	4859.18117347291,0.0575562117979264,3.08855852765194	0.0020113	0.0496748	0	Tmod1	tropomodulin 1 [Source:MGI Symbol;Acc:MGI:98775]	protein_coding	ENSMUST00000107773,ENSMUST00000128689,ENSMUST00000136553,ENSMUST00000155730,ENSMUST00000156200	+	chr4	46038935	46116032	49.2
ENSMUSG00000050921	-2.70224	12.9730268175125,0.87507902203137,-3.08799514373973	0.00201512	0.0496748	-1	P2ry10	purinergic receptor P2Y, G-protein coupled 10 [Source:MGI Symbol;Acc:MGI:1926076]	protein_coding	ENSMUST00000053375,ENSMUST00000118666,ENSMUST00000150494	+	chrX	107088492	107104974	35.19
ENSMUSG00000034317	-2.93566	13.247496837636,0.950723267843851,-3.08782044266071	0.0020163	0.0496748	-1	Trim59	tripartite motif-containing 59 [Source:MGI Symbol;Acc:MGI:1914199]	protein_coding	ENSMUST00000107802,ENSMUST00000136512,ENSMUST00000142560,ENSMUST00000153259	-	chr3	69035288	69044755	38.16
ENSMUSG00000056900	0.172703	5117.74525764345,0.0559310223978921,3.08778162002502	0.00201657	0.0496748	0	Usp13	ubiquitin specific peptidase 13 (isopeptidase T-3) [Source:MGI Symbol;Acc:MGI:1919857]	protein_coding	ENSMUST00000072312,ENSMUST00000108228,ENSMUST00000156769,ENSMUST00000172481	+	chr3	32817546	32938071	44.98
ENSMUSG00000029472	0.24132	7462.36904632647,0.0781606893064905,3.08748866079326	0.00201855	0.0496748	0	Anapc5	anaphase-promoting complex subunit 5 [Source:MGI Symbol;Acc:MGI:1929722]	protein_coding	ENSMUST00000086216,ENSMUST00000196423,ENSMUST00000196640,ENSMUST00000196753,ENSMUST00000197074,ENSMUST00000197331,ENSMUST00000197554,ENSMUST00000197719,ENSMUST00000199025,ENSMUST00000199130,ENSMUST00000199191,ENSMUST00000199406,ENSMUST00000199926,ENSMUST00000200058,ENSMUST00000200148,ENSMUST00000200219,ENSMUST00000200415,ENSMUST00000200645	-	chr5	122787459	122821339	45.26
ENSMUSG00000018593	-0.358252	3456.28761501837,0.116125527886262,-3.08504472992821	0.00203522	0.0499975	0	Sparc	secreted acidic cysteine rich glycoprotein [Source:MGI Symbol;Acc:MGI:98373]	protein_coding	ENSMUST00000018737,ENSMUST00000108858,ENSMUST00000123775,ENSMUST00000125787,ENSMUST00000130642,ENSMUST00000141530	-	chr11	55394500	55420080	49.4
